# Supplementary material for: Comprehensive analyses of the annexin gene family in wheat
Source: PubMed Central journal article supplement (PMC4884362; doi:10.1186/s12864-016-2750-y), 2016-05-28
Supplement: 12864_2016_2750_MOESM1_ESM.pdf [file 12864_2016_2750_MOESM1_ESM.pdf]

**Additional file 1: Table S1.** Information on annexin sequences identified in the *T.aestivum*, *T.urartu* *A.tauschii* and *H.vulgare*.

|                |                               | <i>T.aestivum</i> |          |            |                        | <i>T.urartu</i> |              | <i>A.tauschii</i> |            | <i>H.vulgare</i> |              |  |
|----------------|-------------------------------|-------------------|----------|------------|------------------------|-----------------|--------------|-------------------|------------|------------------|--------------|--|
| Gene           | IWGSC Chromosome Localization | Unigene           | GenBank  | IWGSC      | Gene                   | Gramene         | Gene         | Gramene           | Gene       | Gramene          | GenBank      |  |
| <i>TaAnn1</i>  | <i>TaAnn1-A</i>               | 1AS               | Ta.9484  | AY462115.1 | Traes_1AS_3264B32DD1.1 |                 |              |                   |            |                  |              |  |
|                | <i>TaAnn1-D</i>               | 1DS               |          |            | Traes_1DS_DD0F4640E.1  | <i>TuAnn1</i>   | TRIUR3_22191 | <i>AeAnn1</i>     | AEGTA07604 | <i>HvAnn1</i>    | MLOC_15770.2 |  |
| <i>TaAnn2</i>  | <i>TaAnn2-A</i>               | 1AL               | Ta.37581 |            | Traes_1AL_A5FB19E3C.1  |                 |              |                   |            |                  |              |  |
|                | <i>TaAnn2-B</i>               | 1BL               |          |            | Traes_1BL_E0E972134.1  | <i>TuAnn2</i>   | TRIUR3_11010 |                   |            | <i>HvAnn2</i>    | MLOC_54933.3 |  |
| <i>TaAnn3</i>  | <i>TaAnn3-A</i>               | 1?                | Ta.13303 |            |                        |                 |              |                   |            |                  |              |  |
|                | <i>TaAnn3-B</i>               | 1BL               |          |            | Traes_1BL_04EBF6A19.1  | <i>TuAnn3</i>   | TRIUR3_11009 | <i>AeAnn3</i>     | AEGTA29052 | <i>HvAnn3</i>    | MLOC_54932.1 |  |
| <i>TaAnn4</i>  | <i>TaAnn4-A</i>               | 2AL               |          |            | Traes_2AL_788CA6B69.1  |                 | -            | <i>AeAnn4</i>     | AEGTA21287 |                  | -            |  |
|                | <i>TaAnn4-D</i>               | 2DL               |          |            | Traes_2DL_227971FCE.1  |                 |              |                   |            |                  |              |  |
| <i>TaAnn5</i>  | <i>TaAnn5-B</i>               | 2BS               |          |            | Traes_2BS_879851C74.1  |                 |              | <i>AeAnn5</i>     | AEGTA42363 | <i>HvAnn5</i>    | MLOC_15543.3 |  |
| <i>TaAnn6</i>  | <i>TaAnn6-A</i>               | 3AL               |          | AAR25142.1 | Traes_3AL_A966AD43D.2  |                 |              |                   |            |                  |              |  |
|                | <i>TaAnn6-B</i>               | 3B?               |          |            | Traes_3B_93504D484.1   | <i>TuAnn6</i>   | TRIUR3_18622 | <i>AeAnn6</i>     | AEGTA16509 | <i>HvAnn6</i>    | MLOC_55134.1 |  |
| <i>TaAnn7</i>  | <i>TaAnn7-B</i>               | 4BL               |          |            | Traes_4BL_8BD1B62C8.2  |                 |              |                   |            |                  |              |  |
|                | <i>TaAnn7-D</i>               | 4DL               |          |            | Traes_4DL_D0B60B7B5.2  |                 |              | <i>AeAnn7</i>     | AEGTA11977 |                  |              |  |
| <i>TaAnn8</i>  | <i>TaAnn8-A</i>               | 4AS               | Ta.37581 |            | Traes_4AS_63C8858E9.1  |                 |              |                   |            |                  |              |  |
|                | <i>TaAnn8-D</i>               | 4DL               | Ta.37581 |            | Traes_4DL_87FDF914B.1  |                 |              |                   |            | <i>HvAnn8</i>    | AK370408     |  |
| <i>TaAnn9</i>  | <i>TaAnn9-B</i>               | 5BL               |          |            | Traes_5BL_56B9E776F.1  |                 |              |                   |            |                  |              |  |
|                | <i>TaAnn9-D</i>               | 5DL               | Ta.13966 | AK332757.1 | Traes_5DL_E1D06F29F.1  |                 |              | <i>AeAnn9</i>     | AEGTA10144 |                  |              |  |
| <i>TaAnn10</i> | <i>TaAnn10-A</i>              | 5?                |          | KT198661   |                        | <i>TuAnn10</i>  | TRIUR3_04012 | <i>AeAnn10</i>    | AEGTA28110 | <i>HvAnn10</i>   | MLOC_54650.4 |  |

|                |                  |     |          |            |  |                        |                |              |                |            |                |              |
|----------------|------------------|-----|----------|------------|--|------------------------|----------------|--------------|----------------|------------|----------------|--------------|
|                | <i>TaAnn10-B</i> | 5BL |          |            |  | Traes_5BL_23101F4FA.2  |                |              |                |            |                |              |
|                | <i>TaAnn10-D</i> | 5DL | Ta.63246 |            |  | Traes_5DL_7A3A1FDF9.2  |                |              |                |            |                |              |
|                | <i>TaAnn11-A</i> | 6AL |          |            |  | Traes_6AL_CFE60316E.1  |                |              |                |            |                |              |
| <i>TaAnn11</i> | <i>TaAnn11-B</i> | 6?  | Ta.1577  | AK331181   |  |                        | <i>TuAnn11</i> | TRIUR3_16577 | <i>AeAnn11</i> | AEGTA31729 | <i>HvAnn11</i> | MLOC_51591.2 |
|                | <i>TaAnn11-D</i> | 6DL |          |            |  | Traes_6DL_6F7AB41471.1 |                |              |                |            |                |              |
|                | <i>TaAnn12-A</i> | 7AL | Ta.40948 | AK331881.1 |  | Traes_7AS_FFB7CAFC3.1  |                |              |                |            |                |              |
| <i>TaAnn12</i> | <i>TaAnn12-D</i> | 7DL |          |            |  | Traes_7DS_3F6DCEAA8.1  | <i>TuAnn12</i> | TRIUR3_03306 | <i>AeAnn12</i> | AEGTA27331 | <i>HvAnn12</i> | AK248515     |

---

Spaces: not found
