# Supplementary material for: Comprehensive analyses of the annexin gene family in wheat
Source: PubMed Central journal article supplement (PMC4884362; doi:10.1186/s12864-016-2750-y), 2016-05-28
Supplement: 12864_2016_2750_MOESM2_ESM.pdf [file 12864_2016_2750_MOESM2_ESM.pdf]

**Additional file 2: Table S2.** Description of *T.aestivum*, *T.urartu*, *A.tauschii* and *H.vulgare annexin* genes.

| <b>Species</b>    | <b>Gene</b>     | <b>AA</b> | <b>pI/MW</b> | <b>Aliphatic index</b> | <b>Grand average of hydrophobicity</b> | <b>Subcellular localization</b> |
|-------------------|-----------------|-----------|--------------|------------------------|----------------------------------------|---------------------------------|
|                   | <i>TaAnn1-A</i> | 308       | 9.16/34828.8 | 86.88                  | -0.286                                 | Cytoplasmic                     |
|                   | <i>TaAnn1-D</i> | 316       | 9.01/35404.3 | 86.23                  | -0.343                                 | Cytoplasmic                     |
|                   | <i>TaAnn2-A</i> | 362       | 6.68/39734.3 | 89.01                  | -0.278                                 | Cytoplasmic                     |
|                   | <i>TaAnn2-B</i> | 361       | 6.64/39688.2 | 88.7                   | -0.283                                 | Cytoplasmic                     |
|                   | <i>TaAnn3-A</i> | 315       | 6.60/34774.7 | 84.98                  | -0.261                                 | Cytoplasmic                     |
|                   | <i>TaAnn3-B</i> | 315       | 6.47/34837.7 | 84.03                  | -0.283                                 | Cytoplasmic                     |
|                   | <i>TaAnn4-A</i> | 286       | 5.28/31565.7 | 92.83                  | -0.24                                  | Cytoplasmic                     |
| <i>T.aestivum</i> | <i>TaAnn4-D</i> | 315       | 5.75/34656.3 | 92.41                  | -0.236                                 | Cytoplasmic                     |
|                   | <i>TaAnn5-B</i> | 308       | 6.2/34549.4  | 91.46                  | -0.269                                 | Cytoplasmic                     |
|                   | <i>TaAnn6-A</i> | 316       | 9.31/35654.7 | 89.02                  | -0.307                                 | Cytoplasmic                     |
|                   | <i>TaAnn6-A</i> | 316       | 9.01/35438.3 | 83.77                  | -0.359                                 | Cytoplasmic                     |
|                   | <i>TaAnn6-B</i> | 316       | 9.4/35660.8  | 89.65                  | -0.304                                 | Cytoplasmic                     |
|                   | <i>TaAnn7-B</i> | 319       | 6.68/35671.6 | 90.6                   | -0.321                                 | Cytoplasmic                     |
|                   | <i>TaAnn7-D</i> | 319       | 7.06/35449.4 | 90.63                  | -0.288                                 | Cytoplasmic                     |
|                   | <i>TaAnn8-A</i> | 367       | 9.22/40442.0 | 77.06                  | -0.443                                 | Cytoplasmic                     |

|                 |                  |     |              |       |        |             |
|-----------------|------------------|-----|--------------|-------|--------|-------------|
|                 | <i>TaAnn8-D</i>  | 363 | 9.22/40169.6 | 75.21 | -0.5   | Cytoplasmic |
|                 | <i>TaAnn9-B</i>  | 315 | 8.95/35436.5 | 81.21 | -0.435 | Periplasmic |
|                 | <i>TaAnn9-D</i>  | 315 | 8.95434.4    | 82.13 | -0.437 | Periplasmic |
|                 | <i>TaAnn10-A</i> | 322 | 8.9/36719.9  | 81.96 | -0.47  | Cytoplasmic |
|                 | <i>TaAnn10-B</i> | 330 | 9.09/37585.9 | 80.55 | -0.501 | Cytoplasmic |
|                 | <i>TaAnn10-D</i> | 330 | 8.9/37509.8  | 82.33 | -0.465 | Cytoplasmic |
|                 | <i>TaAnn11-A</i> | 315 | 6.15/35388.1 | 88.38 | -0.395 | Cytoplasmic |
|                 | <i>TaAnn11-B</i> | 315 | 6.36/35372.1 | 88.73 | -0.39  | Cytoplasmic |
|                 | <i>TaAnn11-D</i> | 315 | 6.36/35332.1 | 87.46 | -0.398 | Cytoplasmic |
|                 | <i>TaAnn12-A</i> | 314 | 6.81/35327.1 | 90.16 | -0.428 | Cytoplasmic |
|                 | <i>TaAnn12-D</i> | 314 | 6.81/35239   | 90.19 | -0.425 | Cytoplasmic |
| <i>T.urartu</i> | <i>TuAnn1</i>    | 285 | 6.72/31261.5 | 82.21 | -0.249 | Cytoplasmic |
|                 | <i>TuAnn2</i>    | 328 | 7.67/35713.8 | 91.4  | -0.211 | Cytoplasmic |
|                 | <i>TuAnn3</i>    | 315 | 6.93/34894.8 | 85.3  | -0.267 | Cytoplasmic |
|                 | <i>TuAnn6</i>    | 291 | 9.82/32494.6 | 96.63 | -0.095 | Cytoplasmic |
|                 | <i>TuAnn9</i>    | 339 | 8.75/38234.7 | 84.37 | -0.411 | Cytoplasmic |
|                 | <i>TuAnn10</i>   | 323 | 9.09/36876.0 | 78.39 | -0.525 | Cytoplasmic |
|                 | <i>TuAnn11</i>   | 312 | 6.15/34999.7 | 89.23 | -0.397 | Cytoplasmic |
|                 | <i>TuAnn12</i>   | 314 | 6.81/35327.1 | 90.16 | -0.428 | Cytoplasmic |
|                 | <i>AeAnn1</i>    | 276 | 9.07/30764.1 | 84.2  | -0.322 | Cytoplasmic |

|                    |                   |               |               |              |        |             |             |
|--------------------|-------------------|---------------|---------------|--------------|--------|-------------|-------------|
| <i>A. tauschii</i> | <i>AeAnn2</i>     | 346           | 7.20/38236.7  | 90.55        | -0.234 | Cytoplasmic |             |
|                    | <i>AeAnn3</i>     | 315           | 6.58/34814.7  | 84.35        | -0.263 | Cytoplasmic |             |
|                    | <i>AeAnn4</i>     | 317           | 5.62/34874.5  | 91.51        | -0.246 | Cytoplasmic |             |
|                    | <i>AeAnn5</i>     | 338           | 9.21/38360.5  | 69.59        | -0.572 | Cytoplasmic |             |
|                    | <i>AeAnn6</i>     | 170           | 9.01/19146.9  | 94.18        | -0.231 | Cytoplasmic |             |
|                    | <i>AeAnn7</i>     | 320           | 6.48/35633.6  | 87.88        | -0.304 | Cytoplasmic |             |
|                    | <i>AeAnn9</i>     | 339           | 8.75/38206.7  | 84.37        | -0.412 | Cytoplasmic |             |
|                    | <i>AeAnn10</i>    | 330           | 8.9/37509.8   | 82.33        | -0.465 | Cytoplasmic |             |
|                    | <i>AeAnn11</i>    | 315           | 6.36/35332.1  | 87.46        | -0.398 | Cytoplasmic |             |
|                    | <i>AeAnn12</i>    | 344           | 6.43/38657.0  | 92.53        | -0.331 | Cytoplasmic |             |
|                    | <i>H. vulgare</i> | <i>HvAnn1</i> | 316           | 8.87/35582.7 | 91.11  | -0.292      | Cytoplasmic |
|                    |                   | <i>HvAnn2</i> | 362           | 6.47/39842.6 | 90.86  | -0.227      | Cytoplasmic |
| <i>HvAnn3</i>      |                   | 316           | 6.47/ 34985.8 | 82.53        | -0.31  | Cytoplasmic |             |
| <i>HvAnn5</i>      |                   | 327           | 7.60/ 36977.1 | 87.68        | -0.319 | Cytoplasmic |             |
| <i>HvAnn6</i>      |                   | 373           | 9.82/41824.8  | 86.14        | -0.353 | Cytoplasmic |             |
| <i>HvAnn7</i>      |                   | 359           | 7.66/39782.4  | 85.96        | -0.351 | Cytoplasmic |             |
| <i>HvAnn8</i>      |                   | 363           | 9.22/39935.3  | 74.96        | -0.455 | Cytoplasmic |             |
| <i>HvAnn9</i>      |                   | 315           | 8.95/35421.5  | 80.89        | -0.434 | Periplasmic |             |
| <i>HvAnn10</i>     |                   | 321           | 8.9/36641.7   | 79.13        | -0.504 | Cytoplasmic |             |
| <i>HvAnn11</i>     |                   | 315           | 6.57/35498.3  | 89.62        | -0.371 | Cytoplasmic |             |
| <i>HvAnn12</i>     |                   | 314           | 6.52/35246.0  | 92.36        | -0.395 | Cytoplasmic |             |

AA, protein length (number of amino acid); pI, theoretical isoelectric point; MW, molecular weight
