# Supplementary material for: Comprehensive analyses of the annexin gene family in wheat
Source: PubMed Central journal article supplement (PMC4884362; doi:10.1186/s12864-016-2750-y), 2016-05-28
Supplement: 12864_2016_2750_MOESM3_ESM.pdf [file 12864_2016_2750_MOESM3_ESM.pdf]

|           |                                                                                                                                                                                                                                                                                                                                                                               |     |          |   |   |           |            |           |
|-----------|-------------------------------------------------------------------------------------------------------------------------------------------------------------------------------------------------------------------------------------------------------------------------------------------------------------------------------------------------------------------------------|-----|----------|---|---|-----------|------------|-----------|
| TaAnn6-A  | .....MASLSVFPVLTSFRHDAIALHRAFKFGG...CDSTTVINILAR...DAVQRLIMQYRAYIYH...DLYHRLTSL                                                                                                                                                                                                                                                                                               | 70  |          |   |   |           |            |           |
| TaAnn6-B  | .....MASLSVFPVLTSFRHDAIALHRAFKFGG...CDSTTVINILAR...DAVQRALIMQYRAYIYH...DLYHRLTSL                                                                                                                                                                                                                                                                                              | 70  |          |   |   |           |            |           |
| TaAnn1-A  | .....MASLSVFPVLTPPRDVALHKAFAKFGG...CDSTTVINILAR...DSAQRALILHEYKAIYH...DLYHRLTSL                                                                                                                                                                                                                                                                                               | 70  |          |   |   |           |            |           |
| TaAnn1-D  | .....MASLSVFPVLTPPRDVALHKAFAKFGG...CDSTTVINILAR...DSAQRALILHEYKAIYH...DLYHRLTSL                                                                                                                                                                                                                                                                                               | 70  |          |   |   |           |            |           |
| TaAnn9-B  | .....MASLTPFAPFNQGDIDLHKAFAKFGG...CDSTTVINILAR...DSMQRTIQOQYPTMYS...ELSRITSL                                                                                                                                                                                                                                                                                                  | 70  |          |   |   |           |            |           |
| TaAnn9-D  | .....MASLTPFAPFNQGDIDLHKAFAKFGG...CDSTTVINILAR...DSMQRTIQOQYPTMYS...ELSRITSL                                                                                                                                                                                                                                                                                                  | 70  |          |   |   |           |            |           |
| TaAnn7-B  | .....MATIATVPTPLSPAADASLRNVAQVGG...TDEKALVILGR...TAQARAIIRRAYASLYK...SLLRITSL                                                                                                                                                                                                                                                                                                 | 70  |          |   |   |           |            |           |
| TaAnn7-D  | .....MATIATVPTPLSPAADASLRNVAQVGG...TDEKALVILGR...TAQARAIIRRAYASLYK...SLLRITSL                                                                                                                                                                                                                                                                                                 | 70  |          |   |   |           |            |           |
| TaAnn5-B  | .....MSAIVVSPVPSFSDAEGIRKALQVGR...ADKEALVIRLAG...PLMSFRQR...PLLRITSL                                                                                                                                                                                                                                                                                                          | 58  |          |   |   |           |            |           |
| TaAnn2-A  | MCGGCGCLDCHNIPPLMLPLHFS...SAARTGRGEGEGARTLSPMASISVDPASSPTEDEASIRKAVQVGG...TDENALIEILGR...TAQARAIIRRAYASLYK...PLLRITSL                                                                                                                                                                                                                                                         | 113 |          |   |   |           |            |           |
| TaAnn2-B  | MCGGCGCLDCHNIPPLMLPLHFS...LSSSAASAGGEGAAAAVPMASISVVPASSPTEDEASIRKAVQVGG...TDENALIEILGR...TAQARAIIRRAYASLYK...PLLRITSL                                                                                                                                                                                                                                                         | 112 |          |   |   |           |            |           |
| OsAnn2    | MCGGCGCLDCHNIPPLMLPLHFS...LSSSAASAGGEGAAAAVPMASISVVPASSPTEDEASIRKAVQVGG...TDENALIEILGR...TAQARAIIRRAYASLYK...PLLRITSL                                                                                                                                                                                                                                                         | 119 |          |   |   |           |            |           |
| TaAnn11-A | .....MATLSVPAAVPAVADCCQLRKAFAKFGG...TNERLIVSILAR...DAQRAIRRAYAYEAGE...ELLRAIGSEH                                                                                                                                                                                                                                                                                              | 70  |          |   |   |           |            |           |
| TaAnn11-D | .....MATLSVPAAVPAVADCCQLRKAFAKFGG...TNERLIVSILAR...DAQRAIRRAYAYEAGE...ELLRAIGSEH                                                                                                                                                                                                                                                                                              | 70  |          |   |   |           |            |           |
| TaAnn1-B  | .....MATLSVPAAVPAVADCCQLRKAFAKFGG...TNERLIVSILAR...DAQRAIRRAYAYEAGE...ELLRAIGSEH                                                                                                                                                                                                                                                                                              | 70  |          |   |   |           |            |           |
| TaAnn12-A | .....MATLKVPSNVPAADCCQLRKAFAKFGG...TNEALISILGR...DAQRAIRRAYAYEAGE...ELLRAIGSEH                                                                                                                                                                                                                                                                                                | 70  |          |   |   |           |            |           |
| TaAnn12-D | .....MATLKVPSNVPAADCCQLRKAFAKFGG...TNEALISILGR...DAQRAIRRAYAYEAGE...ELLRAIGSEH                                                                                                                                                                                                                                                                                                | 70  |          |   |   |           |            |           |
| TaAnn4-A  | .....MTTITVQVPSVPEDEALIMKFAQVGG...TDEQAVIYLAR...DAQRKLIRQAYEKEVNE...LLRITSL                                                                                                                                                                                                                                                                                                   | 70  |          |   |   |           |            |           |
| TaAnn4-D  | .....MTTITVQVPSVPEDEALIMKFAQVGG...TDEQAVIYLAR...DAQRKLIRQAYEKEVNE...LLRITSL                                                                                                                                                                                                                                                                                                   | 70  |          |   |   |           |            |           |
| TaAnn8-D  | .....MQQFLAAQPSNGST...AAAAPFSPSPSPLRSRPFRRDQOQS...IKEATMADEHQETKAFSGMGLVEETALVSAIGMWRKQPEKRAQFRRCQFPFAAAGAGAGAEIRSD...VYRHLTEFA                                                                                                                                                                                                                                               | 128 |          |   |   |           |            |           |
| TaAnn3-A  | .....MADEVALTKAFSGMGLGVDPTMVAALANWRKQPEKRSGRFRKFFGLFK...EHGV...IERCEDE...YMLHLAASF                                                                                                                                                                                                                                                                                            | 72  |          |   |   |           |            |           |
| TaAnn3-B  | .....MADEVALTKAFSGMGLGVDPTMVAALANWRKQPEKRSGRFRKFFGLFK...EHGV...IERCEDE...YMLHLAASF                                                                                                                                                                                                                                                                                            | 72  |          |   |   |           |            |           |
| TaAnn10-A | .....MAARS...PAAGFENCEIRHGACDEPR...RLSRLARR...SASERQIKATYRAMFGE...DLAQLRHLIT                                                                                                                                                                                                                                                                                                  | 64  |          |   |   |           |            |           |
| TaAnn10-D | .....MAARS...PAAGFENCEIRHGACDEPR...RLSRLARR...SASERQIKATYRAMFGE...DLAQLRHLIT                                                                                                                                                                                                                                                                                                  | 64  |          |   |   |           |            |           |
| TaAnn10-B | .....MAARS...PAAGFENCEIRHGACDEPR...RLSRLARR...SASERQIKATYRAMFGE...DLAQLRHLIT                                                                                                                                                                                                                                                                                                  | 64  |          |   |   |           |            |           |
| Consensus | .....MAARS...PAAGFENCEIRHGACDEPR...RLSRLARR...SASERQIKATYRAMFGE...DLAQLRHLIT                                                                                                                                                                                                                                                                                                  | 64  |          |   |   |           |            |           |
|           | a                                                                                                                                                                                                                                                                                                                                                                             | 1   | Repeat 1 |   |   |           |            |           |
| TaAnn6-A  | GMHK.....KAMLWLDVPGRTATLNQSLNGDI...TDLRAATV...SFPDQIQIMKQYARFQCYLEDITER...TYGDHKLILLAYLIGFRYGEPEVDPAARADARELYRAGE...KRLGTDER                                                                                                                                                                                                                                                  | 188 |          |   |   |           |            |           |
| TaAnn6-B  | GMHK.....KAMLWLDVPGRTATLNQSLNGDI...TDLRAATV...SFPDQIQIMKQYARFQCYLEDITER...TYGDHKLILLAYLIGFRYGEPEVDPAARADARELYRAGE...KRLGTDER                                                                                                                                                                                                                                                  | 188 |          |   |   |           |            |           |
| TaAnn1-A  | GMHKSRENPAWMLQNALWLDVPGRTATLNQSLNGDI...TDLRAATV...SFPDQIQIMKQYARFQCYLEDITER...TYGDHKLILLAYLIG...LYQAGE...KRVGTDER                                                                                                                                                                                                                                                             | 180 |          |   |   |           |            |           |
| TaAnn1-D  | GMHK.....KAMLWLDVPGRTATLNQSLNGDI...TDLRAATV...SFPDQIQIMKQYARFQCYLEDITER...TYGDHKLILLAYLIGFRYGEPEVDPAARADARELYRAGE...KRLGTDER                                                                                                                                                                                                                                                  | 188 |          |   |   |           |            |           |
| TaAnn9-B  | GMHK.....KAMSLWLDVPGRTATLNQSLNGDI...LDLKAATDI...SFPDQIQIMKQYARFQCYLEDITER...ASGDQRKILLAYLIGFRYGEPEVDPTVTHDKADLYRAGE...KRLGTDER                                                                                                                                                                                                                                                | 188 |          |   |   |           |            |           |
| TaAnn9-D  | GMHK.....KAMSLWLDVPGRTATLNQSLNGDI...LDLKAATDI...SFPDQIQIMKQYARFQCYLEDITER...ASGDQRKILLAYLIGFRYGEPEVDPTVTHDKADLYRAGE...KRLGTDER                                                                                                                                                                                                                                                | 188 |          |   |   |           |            |           |
| TaAnn7-B  | GHFK.....AMVLLTADPAERAKLAREALGR...GDDRDWLV...RAPPDHLVAVRVAIRYRSLHSGSLEEDVAACSAFQPLKRLVLSVRSYRCAESVDMVAKLEAQLAERIR...KKQPHAG                                                                                                                                                                                                                                                   | 192 |          |   |   |           |            |           |
| TaAnn7-D  | GHFK.....AMVLLTADPAERAKLAREALGR...GDDRDWLV...RAPPDHLVAVRVAIRYRSLHSGSLEEDVAACSAFQPLKRLVLSVRSYRCAESVDMVAKLEAQLAERIR...KKQPHAG                                                                                                                                                                                                                                                   | 192 |          |   |   |           |            |           |
| TaAnn5-B  | VDFK.....AIIWLTADPAERAKLAREALGR...GDDRDWLV...RAPPDHLVAVRVAIRYRSLHSGSLEEDVAACSAFQPLKRLVLSVRSYRCAESVDMVAKLEAQLAERIR...KKQPHAG                                                                                                                                                                                                                                                   | 179 |          |   |   |           |            |           |
| TaAnn2-A  | SHFK.....AMTLMWMDPAERAKLAREALGR...GDDRDWLV...RAPPDHLVAVRVAIRYRSLHSGSLEEDVAACSAFQPLKRLVLSVRSYRCAESVDMVAKLEAQLAERIR...KKQPHAG                                                                                                                                                                                                                                                   | 234 |          |   |   |           |            |           |
| TaAnn2-B  | SHFK.....AMTLMWMDPAERAKLAREALGR...GDDRDWLV...RAPPDHLVAVRVAIRYRSLHSGSLEEDVAACSAFQPLKRLVLSVRSYRCAESVDMVAKLEAQLAERIR...KKQPHAG                                                                                                                                                                                                                                                   | 235 |          |   |   |           |            |           |
| OsAnn2    | GDPRS.....AMTLMWMDPAERAKLAREALGR...GDDRDWLV...RAPPDHLVAVRVAIRYRSLHSGSLEEDVAACSAFQPLKRLVLSVRSYRCAESVDMVAKLEAQLAERIR...KKQPHAG                                                                                                                                                                                                                                                  | 244 |          |   |   |           |            |           |
| TaAnn11-A | GKFER.....AVIWTADPAERAKLAREALGR...GDDRDWLV...RAPPDHLVAVRVAIRYRSLHSGSLEEDVAACSAFQPLKRLVLSVRSYRCAESVDMVAKLEAQLAERIR...KKQPHAG                                                                                                                                                                                                                                                   | 187 |          |   |   |           |            |           |
| TaAnn11-D | GKFER.....AVIWTADPAERAKLAREALGR...GDDRDWLV...RAPPDHLVAVRVAIRYRSLHSGSLEEDVAACSAFQPLKRLVLSVRSYRCAESVDMVAKLEAQLAERIR...KKQPHAG                                                                                                                                                                                                                                                   | 187 |          |   |   |           |            |           |
| TaAnn12-A | GKFER.....AVIWTADPAERAKLAREALGR...GDDRDWLV...RAPPDHLVAVRVAIRYRSLHSGSLEEDVAACSAFQPLKRLVLSVRSYRCAESVDMVAKLEAQLAERIR...KKQPHAG                                                                                                                                                                                                                                                   | 187 |          |   |   |           |            |           |
| TaAnn12-D | GKFER.....AVIWTADPAERAKLAREALGR...GDDRDWLV...RAPPDHLVAVRVAIRYRSLHSGSLEEDVAACSAFQPLKRLVLSVRSYRCAESVDMVAKLEAQLAERIR...KKQPHAG                                                                                                                                                                                                                                                   | 187 |          |   |   |           |            |           |
| TaAnn4-A  | GLQT.....AMGYWLDPTDTEROAVIANATKCID...EYYPV...RANSPDHLVAVRVAIRYRSLHSGSLEEDVAACSAFQPLKRLVLSVRSYRCAESVDMVAKLEAQLAERIR...KKQPHAG                                                                                                                                                                                                                                                  | 188 |          |   |   |           |            |           |
| TaAnn4-D  | GLQT.....AMGYWLDPTDTEROAVIANATKCID...EYYPV...RANSPDHLVAVRVAIRYRSLHSGSLEEDVAACSAFQPLKRLVLSVRSYRCAESVDMVAKLEAQLAERIR...KKQPHAG                                                                                                                                                                                                                                                  | 188 |          |   |   |           |            |           |
| TaAnn8-A  | RFTK.....LMVLMAMHPWERARLHHVLRHQA...PAAD...RANSPDHLVAVRVAIRYRSLHSGSLEEDVAACSAFQPLKRLVLSVRSYRCAESVDMVAKLEAQLAERIR...KKQPHAG                                                                                                                                                                                                                                                     | 244 |          |   |   |           |            |           |
| TaAnn8-D  | RFTK.....LMVLMAMHPWERARLHHVLRHQA...PAAD...RANSPDHLVAVRVAIRYRSLHSGSLEEDVAACSAFQPLKRLVLSVRSYRCAESVDMVAKLEAQLAERIR...KKQPHAG                                                                                                                                                                                                                                                     | 240 |          |   |   |           |            |           |
| TaAnn3-A  | RFTK.....LMVLMAMHPWERARLHHVLRHQA...PAAD...RANSPDHLVAVRVAIRYRSLHSGSLEEDVAACSAFQPLKRLVLSVRSYRCAESVDMVAKLEAQLAERIR...KKQPHAG                                                                                                                                                                                                                                                     | 192 |          |   |   |           |            |           |
| TaAnn3-B  | RFTK.....LMVLMAMHPWERARLHHVLRHQA...PAAD...RANSPDHLVAVRVAIRYRSLHSGSLEEDVAACSAFQPLKRLVLSVRSYRCAESVDMVAKLEAQLAERIR...KKQPHAG                                                                                                                                                                                                                                                     | 192 |          |   |   |           |            |           |
| TaAnn10-A | ANQDNE.....LNCNLWLDLAEARIMARDAIESG...AAADYRAL...FTFRKQDLFFTKQAYLARFKKLEQDMVTD...PSPYORLLVALATSHKSHDEPSHQIAKCDARLYDAKNG...GGTGSVDEA                                                                                                                                                                                                                                            | 189 |          |   |   |           |            |           |
| TaAnn10-D | ANQDNE.....LNCNLWLDLAEARIMARDAIESG...AAADYRAL...FTFRKQDLFFTKQAYLARFKKLEQDMVTD...PSPYORLLVALATSHKSHDEPSHQIAKCDARLYDAKNG...GGTGSVDEA                                                                                                                                                                                                                                            | 197 |          |   |   |           |            |           |
| TaAnn10-B | ANQDNE.....LNCNLWLDLAEARIMARDAIESG...AAADYRAL...FTFRKQDLFFTKQAYLARFKKLEQDMVTD...PSPYORLLVALATSHKSHDEPSHQIAKCDARLYDAKNG...GGTGSVDEA                                                                                                                                                                                                                                            | 197 |          |   |   |           |            |           |
| Consensus | ANQDNE.....LNCNLWLDLAEARIMARDAIESG...AAADYRAL...FTFRKQDLFFTKQAYLARFKKLEQDMVTD...PSPYORLLVALATSHKSHDEPSHQIAKCDARLYDAKNG...GGTGSVDEA                                                                                                                                                                                                                                            | 197 |          |   |   |           |            |           |
|           | r                                                                                                                                                                                                                                                                                                                                                                             | a   | y        | d | 1 | Repeat II | Repeat III | Repeat IV |
| TaAnn6-A  | AFIRFTFERSWAHLAAVAGAYHHLVARSLEKAVKESGT...FEFGLLTL...AESPA...FAKALHKAMG...LSDSDTL...VVVTRAEVDMQV...KAEYHKYKRSGLADAH...NRYTFLSLVGRDR...                                                                                                                                                                                                                                         | 316 |          |   |   |           |            |           |
| TaAnn6-B  | AFIRFTFERSWAHLAAVAGAYHHLVARSLEKAVKESGT...FEFGLLTL...AESPA...FAKALHKAMG...LSDSDTL...VVVTRAEVDMQV...KAEYHKYKRSGLADAH...NRYTFLSLVGRDR...                                                                                                                                                                                                                                         | 316 |          |   |   |           |            |           |
| TaAnn1-A  | AFIRFTFERSWAHLAAVAGAYHHLVARSLEKAVKESGT...FEFGLLTL...AESPA...FAKALHKAMG...LSDSDTL...VVVTRAEVDMQV...KAEYHKYKRSGLADAH...NRYTFLSLVGRDR...                                                                                                                                                                                                                                         | 308 |          |   |   |           |            |           |
| TaAnn1-D  | AFIRFTFERSWAHLAAVAGAYHHLVARSLEKAVKESGT...FEFGLLTL...AESPA...FAKALHKAMG...LSDSDTL...VVVTRAEVDMQV...KAEYHKYKRSGLADAH...NRYTFLSLVGRDR...                                                                                                                                                                                                                                         | 316 |          |   |   |           |            |           |
| TaAnn9-B  | TFIRFTFERSWAHLAAVAGAYHHLVARSLEKAVKESGT...FEVALLTL...AEMPAK...FAKALHKAMG...LSDSDTL...VVVTRAEVDMQV...KAEYHKYKRSGLADAH...NRYTFLSLVGRDR...                                                                                                                                                                                                                                        | 315 |          |   |   |           |            |           |
| TaAnn9-D  | TFIRFTFERSWAHLAAVAGAYHHLVARSLEKAVKESGT...FEVALLTL...AEMPAK...FAKALHKAMG...LSDSDTL...VVVTRAEVDMQV...KAEYHKYKRSGLADAH...NRYTFLSLVGRDR...                                                                                                                                                                                                                                        | 315 |          |   |   |           |            |           |
| TaAnn7-B  | EVWRVSTRSKPQLATFRCYKQHGSDIEMDMK...FARMKI...VTSPEK...FAVIRYSILG...LSDSDTL...VVVTRAEVDMQV...KAEYHKYKRSGLADAH...NRYTFLSLVGRDR...                                                                                                                                                                                                                                                 | 319 |          |   |   |           |            |           |
| TaAnn7-D  | EVWRVSTRSKPQLATFRCYKQHGSDIEMDMK...FARMKI...VTSPEK...FAVIRYSILG...LSDSDTL...VVVTRAEVDMQV...KAEYHKYKRSGLADAH...NRYTFLSLVGRDR...                                                                                                                                                                                                                                                 | 319 |          |   |   |           |            |           |
| TaAnn5-B  | EVVQLGTRSKPQLATFRCYKQHGSDIEMDMK...FARMKI...VTSPEK...FAVIRYSILG...LSDSDTL...VVVTRAEVDMQV...KAEYHKYKRSGLADAH...NRYTFLSLVGRDR...                                                                                                                                                                                                                                                 | 308 |          |   |   |           |            |           |
| TaAnn2-A  | DVWRVSTRSKPQLATFRCYKQHGSDIEMDMK...FARMKI...VTSPEK...FAVIRYSILG...LSDSDTL...VVVTRAEVDMQV...KAEYHKYKRSGLADAH...NRYTFLSLVGRDR...                                                                                                                                                                                                                                                 | 362 |          |   |   |           |            |           |
| TaAnn2-B  | DVWRVSTRSKPQLATFRCYKQHGSDIEMDMK...FARMKI...VTSPEK...FAVIRYSILG...LSDSDTL...VVVTRAEVDMQV...KAEYHKYKRSGLADAH...NRYTFLSLVGRDR...                                                                                                                                                                                                                                                 | 361 |          |   |   |           |            |           |
| OsAnn2    | DVWRVSTRSKPQLATFRCYKQHGSDIEMDMK...FARMKI...VTSPEK...FAVIRYSILG...LSDSDTL...VVVTRAEVDMQV...KAEYHKYKRSGLADAH...NRYTFLSLVGRDR...                                                                                                                                                                                                                                                 | 372 |          |   |   |           |            |           |
| TaAnn11-A | EIVRLITRSKQALLATFNNSYDQSHPIKDKL...PKME...FLSTR...VTSPEK...FAVIRYSILG...LSDSDTL...VVVTRAEVDMQV...KAEYHKYKRSGLADAH...NRYTFLSLVGRDR...                                                                                                                                                                                                                                           | 315 |          |   |   |           |            |           |
| TaAnn11-D | EIVRLITRSKQALLATFNNSYDQSHPIKDKL...PKME...FLSTR...VTSPEK...FAVIRYSILG...LSDSDTL...VVVTRAEVDMQV...KAEYHKYKRSGLADAH...NRYTFLSLVGRDR...                                                                                                                                                                                                                                           | 315 |          |   |   |           |            |           |
| TaAnn11-B | EIVRLITRSKQALLATFNNSYDQSHPIKDKL...PKME...FLSTR...VTSPEK...FAVIRYSILG...LSDSDTL...VVVTRAEVDMQV...KAEYHKYKRSGLADAH...NRYTFLSLVGRDR...                                                                                                                                                                                                                                           | 315 |          |   |   |           |            |           |
| TaAnn12-A | EIVRLITRSKQALLATFNNSYDQSHPIKDKL...PKME...FLSTR...VTSPEK...FAVIRYSILG...LSDSDTL...VVVTRAEVDMQV...KAEYHKYKRSGLADAH...NRYTFLSLVGRDR...                                                                                                                                                                                                                                           | 314 |          |   |   |           |            |           |
| TaAnn12-D | EIVRLITRSKQALLATFNNSYDQSHPIKDKL...PKME...FLSTR...VTSPEK...FAVIRYSILG...LSDSDTL...VVVTRAEVDMQV...KAEYHKYKRSGLADAH...NRYTFLSLVGRDR...                                                                                                                                                                                                                                           | 314 |          |   |   |           |            |           |
| TaAnn4-A  | EIVRLITRSKQALLATFNNSYDQSHPIKDKL...PKME...FLSTR...VTSPEK...FAVIRYSILG...LSDSDTL...VVVTRAEVDMQV...KAEYHKYKRSGLADAH...NRYTFLSLVGRDR...                                                                                                                                                                                                                                           | 286 |          |   |   |           |            |           |
| TaAnn4-D  | EIVRLITRSKQALLATFNNSYDQSHPIKDKL...PKME...FLSTR...VTSPEK...FAVIRYSILG...LSDSDTL...VVVTRAEVDMQV...KAEYHKYKRSGLADAH...NRYTFLSLVGRDR...                                                                                                                                                                                                                                           | 315 |          |   |   |           |            |           |
| TaAnn8-A  | LVVRLITRSKQALLATFNNSYDQSHPIKDKL...PKME...FLSTR...VTSPEK...FAVIRYSILG...LSDSDTL...VVVTRAEVDMQV...KAEYHKYKRSGLADAH...NRYTFLSLVGRDR...                                                                                                                                                                                                                                           | 367 |          |   |   |           |            |           |
| TaAnn8-D  | LVVRLITRSKQALLATFNNSYDQSHPIKDKL...PKME...FLSTR...VTSPEK...FAVIRYSILG...LSDSDTL...VVVTRAEVDMQV...KAEYHKYKRSGLADAH...NRYTFLSLVGRDR...                                                                                                                                                                                                                                           | 363 |          |   |   |           |            |           |
| TaAnn3-A  | EVVRLITRSKQALLATFNNSYDQSHPIKDKL...PKME...FLSTR...VTSPEK...FAVIRYSILG...LSDSDTL...VVVTRAEVDMQV...KAEYHKYKRSGLADAH...NRYTFLSLVGRDR...                                                                                                                                                                                                                                           | 315 |          |   |   |           |            |           |
| TaAnn3-B  | EVVRLITRSKQALLATFNNSYDQSHPIKDKL...PKME...FLSTR...VTSPEK...FAVIRYSILG...LSDSDTL...VVVTRAEVDMQV...KAEYHKYKRSGLADAH...NRYTFLSLVGRDR...                                                                                                                                                                                                                                           | 315 |          |   |   |           |            |           |
| TaAnn10-A | AVLEMFKRSI...PQLR...LALCSYKH...YGHDF...TKALK...N...L...D...FEES...R...V...V...V...Y...T...P...S...K...C...K...L...Q...R...S...M...Q...R...P...E...A...D...K...R...L...V...A...I...L...G...S...D...D...V...G...I...N...E...I...K...L...A...F...K...S...N...F...G...K...N...L...A...D...F...H...S...L...P...S...D...Y...R...F...L...M...W...Q...G...G...C...L...V...A...S...322 | 322 |          |   |   |           |            |           |
| TaAnn10-D | AVLEMFKRSI...PQLR...LALCSYKH...YGHDF...TKALK...N...L...D...FEES...R...V...V...V...Y...T...P...S...K...C...K...L...Q...R...S...M...Q...R...P...E...A...D...K...R...L...V...A...I...L...G...S...D...D...V...G...I...N...E...I...K...L...A...F...K...S...N...F...G...K...N...L...A...D...F...H...S...L...P...S...D...Y...R...F...L...M...W...Q...G...G...C...L...V...A...S...330 | 330 |          |   |   |           |            |           |
| TaAnn10-B | AVLEMFKRSI...PQLR...LALCSYKH...YGHDF...TKALK...N...L...D...FEES...R...V...V...V...Y...T...P...S...K...C...K...L...Q...R...S...M...Q...R...P...E...A...D...K...R...L...V...A...I...L...G...S...D...D...V...G...I...N...E...I...K...L...A...F...K...S...N...F...G...K...N...L...A...D...F...H...S...L...P...S...D...Y...R...F...L...M...W...Q...G...G...C...L...V...A...S...330 | 330 |          |   |   |           |            |           |
| Consensus | AVLEMFKRSI...PQLR...LALCSYKH...YGHDF...TKALK...N...L...D...FEES...R...V...V...V...Y...T...P...S...K...C...K...L...Q...R...S...M...Q...R...P...E...A...D...K...R...L...V...A...I...L...G...S...D...D...V...G...I...N...E...I...K...L...A...F...K...S...N...F...G...K...N...L...A...D...F...H...S...L...P...S...D...Y...R...F...L...M...W...Q...G...G...C...L...V...A...S...330 | 330 |          |   |   |           |            |           |

**Additional file 3: Figure S1. Multiple sequence alignment of deduced amino acid sequences of 25 wheat annexin genes with rice annexin *OsAnn2* (*Os05g31760*) obtained by ClustalW. The conserved annexin repeats (Repeat 1 to Repeat 4) are shown beneath the deduced sequence alignments. The sequences highlighted are as follows; olive the two Cys and two His residues represented in bold in Zinc finger C2H2 type domain signature in *OsAnn2*, *TaAnn2-A* and *TaAnn2-B*; yellow conserved His residue; blue salt bridges suggested to be involved in ion channel function; pink conserved residues in S3 cluster that are involved in regulating redox reactions; green IRI motif involved in F-actin binding; red putative GTP binding motifs; the type-II calcium binding motifs are boxed in blue; Light grey and letters indicates the conserved**

residues in all the 25 deduced sequences. Point indicate the sequence gaps to optimize the alignment (color figure online).
