# Supplementary material for: Comprehensive analyses of the annexin gene family in wheat
Source: PubMed Central journal article supplement (PMC4884362; doi:10.1186/s12864-016-2750-y), 2016-05-28
Supplement: 12864_2016_2750_MOESM4_ESM.pdf [file 12864_2016_2750_MOESM4_ESM.pdf]

**Additional file 4: Table S3. Conserved sequence motifs identified in the amino acid sequences of in wheat, *T.urartu*, *A.tauschii*, barley and rice as analyzed by MEME tools.** The motif numbers correspond to the colored boxes in Figure 1.

| <b>Motif</b> | <b>Width</b> | <b>Multilevel consensus sequence</b>               |
|--------------|--------------|----------------------------------------------------|
| 1            | 50           | LTRVIVTRAEVDMKYIKQEYQKRFKVPLEDDVHGDTSGNYQDFLLSLVGS |
| 2            | 41           | MATISVPPPVPSPREDCINLHKAFQGWGCNETTIINILGHR          |
| 3            | 34           | EFIRIFTTRSWPQLRATFNCYNMHGHPITKDLK                  |
| 4            | 50           | GWHPDNWVLVEIICSRTPSQLFIMRQAYHARFGCSLEEDVAYCVTGDHQB |
| 5            | 41           | NPSGNFEFMLRTIVWCFTCPDKYFCKVIRKSMKGLGTDENT          |
| 6            | 29           | EISGNFCNAMILWMMDPWERDATMANEAL                      |
| 7            | 21           | LLVPLVSSYRYEGPEVNPDLA                              |
| 8            | 21           | DAAQRQQIRQHYATMYGEDLL                              |
| 9            | 50           | ELTKAFSGMGGLGVDEPTMVSALANWRKQPEKRSRGSFPGFFKPHGVI   |
| 10           | 15           | EAKQLYEAINKKKGP                                    |
