# Supplementary material for: Comprehensive analyses of the annexin gene family in wheat
Source: PubMed Central journal article supplement (PMC4884362; doi:10.1186/s12864-016-2750-y), 2016-05-28
Supplement: 12864_2016_2750_MOESM6_ESM.pdf [file 12864_2016_2750_MOESM6_ESM.pdf]

**Additional file 6: Table S4.** Orthologous groups of annexin genes in *T.aestivuma*, *T.urartu*, *A.tauschii*, *H. vulgare*, *O.sativa* and *B.distachyon*.

| wheat          |                | Homologues   |                 |              |                   |            |                     |              |                 |                              |
|----------------|----------------|--------------|-----------------|--------------|-------------------|------------|---------------------|--------------|-----------------|------------------------------|
| Gene           | barley         |              | <i>T.urartu</i> |              | <i>A.tauschii</i> |            | <i>B.distachyon</i> |              | <i>O.sativa</i> |                              |
|                | Gene           | Accession    | Gene            | Accession    | Gene              | Accession  | Gene                | Accession    | Gene            | Accession                    |
| <i>TaAnn1</i>  | <i>HvAnn1</i>  | MLOC_15770.2 | <i>TuAnn1</i>   | TRIUR3_22191 | <i>AeAnn1</i>     | AEGTA07604 | <i>BdAnn1</i>       | BRADI3G36240 | <i>OsAnn1</i>   | Os08g32970.1                 |
| <i>TaAnn2</i>  | <i>HvAnn2</i>  | MLOC_54933.3 | <i>TuAnn2</i>   | TRIUR3_11010 | <i>AeAnn2</i>     | AEGTA15612 | <i>BdAnn2</i>       | BRADI2G26770 | <i>OsAnn2</i>   | Os05g31760.1                 |
| <i>TaAnn3</i>  | <i>HvAnn3</i>  | MLOC_54932.1 | <i>TuAnn3</i>   | TRIUR3_11009 | <i>AeAnn3</i>     | AEGTA29052 | <i>BdAnn3</i>       | BRADI2G26760 | <i>OsAnn3</i>   | Os05g31750.1                 |
| <i>TaAnn4</i>  | -              | -            | -               | -            | <i>AeAnn4</i>     | AEGTA21287 | <i>BdAnn4</i>       | BRADI2G13620 | <i>OsAnn4</i>   | Os01g31270.1                 |
| <i>TaAnn5</i>  | <i>HvAnn5</i>  | MLOC_15543.3 | -               | -            | <i>AeAnn5</i>     | AEGTA42363 | <i>BdAnn5</i>       | BRADI1G18990 | <i>OsAnn5</i>   | Os07g46550.1                 |
| <i>TaAnn6</i>  | <i>HvAnn6</i>  | MLOC_55134.1 | <i>TuAnn6</i>   | TRIUR3_18622 | <i>AeAnn6</i>     | AEGTA16509 | -                   | -            | -               | -                            |
| <i>TaAnn7</i>  | <i>HvAnn7</i>  | MLOC_3056.1  | -               | -            | <i>AeAnn7</i>     | AEGTA11977 | <i>BdAnn7</i>       | BRADI1G62120 | -               | -                            |
| <i>TaAnn8</i>  | <i>HvAnn8</i>  | AK370408     | -               | -            | -                 | -          | <i>BdAnn8</i>       | BRADI1G62130 | -               | -                            |
| <i>TaAnn9</i>  | <i>HvAnn9</i>  | AK249691.1   | <i>TuAnn9</i>   | TRIUR3_32496 | <i>AeAnn9</i>     | AEGTA10144 | <i>BdAnn9</i>       | BRADI4G29680 | <i>OsAnn9a</i>  | Os09g23160.1                 |
| <i>TaAnn10</i> | <i>HvAnn10</i> | MLOC_54650.4 | <i>TuAnn10</i>  | TRIUR3_04012 | <i>AeAnn10</i>    | AEGTA28110 | <i>BdAnn10</i>      | BRADI4G31920 | <i>OsAnn10</i>  | Os09g27990.1<br>Os09g27990.2 |
| <i>TaAnn11</i> | <i>HvAnn11</i> | MLOC_51591.2 | <i>TuAnn11</i>  | TRIUR3_16577 | <i>AeAnn11</i>    | AEGTA31729 | <i>BdAnn11</i>      | BRADI3G58830 | <i>OsAnn11</i>  | Os02g51750.1                 |
| <i>TaAnn12</i> | <i>HvAnn12</i> | AK248515     | <i>TuAnn12</i>  | TRIUR3_03306 | <i>AeAnn12</i>    | AEGTA27331 | <i>BdAnn12</i>      | BRADI1G45487 | <i>OsAnn12</i>  | Os06g11800.1                 |

-: Not found
