# Supplementary material for: Comprehensive analyses of the annexin gene family in wheat
Source: PubMed Central journal article supplement (PMC4884362; doi:10.1186/s12864-016-2750-y), 2016-05-28
Supplement: 12864_2016_2750_MOESM7_ESM.pdf [file 12864_2016_2750_MOESM7_ESM.pdf]

**Additional file 7: Table S5.** Orthologous groups of annexin genes in *T.aestivuma*, *T.urartu*, *A.tauschii*, *H. vulgare*, *O.sativa* and *B.distachyon*.

| Orthologous Groups | Genes                                                                                                             | Missing data                  |
|--------------------|-------------------------------------------------------------------------------------------------------------------|-------------------------------|
| OrthoMCL1          | <i>AeAnn1, BdAnn1, HvAnn1, TaAnn1, HvAnn6, TaAnn6, TuAnn6</i>                                                     | <i>OsAnn6, BdAnn6</i>         |
| OrthoMCL 2         | <i>AeAnn2, BdAnn2, HvAnn2, OsAnn2, TaAnn2, TuAnn2</i>                                                             |                               |
| OrthoMCL 3         | <i>AeAnn3, BdAnn3, HvAnn3, OsAnn3, TaAnn3, TuAnn3</i>                                                             |                               |
| OrthoMCL 4         | <i>AeAnn4, BdAnn4, OsAnn4, TaAnn4</i>                                                                             | <i>TuAnn4, HvAnn4</i>         |
| OrthoMCL 5         | <i>AeAnn5, BdAnn5, HvAnn5, OsAnn5, TaAnn5</i>                                                                     | <i>TuAnn5,</i>                |
| OrthoMCL 6         | <i>AeAnn7, HvAnn7, TaAnn7</i>                                                                                     | <i>TuAnn7, OsAnn7</i>         |
| OrthoMCL 7         | <i>BdAnn8, HvAnn8, TaAnn8</i>                                                                                     | <i>TuAnn8, AeAnn8, OsAnn8</i> |
| OrthoMCL 8         | <i>AeAnn9, BdAnn9, HvAnn9, OsAnn9, TaAnn9, TuAnn9</i>                                                             |                               |
| OrthoMCL 9         | <i>AeAnn10, BdAnn10, HvAnn10, OsAnn10, TaAnn10, TuAnn10</i>                                                       |                               |
| OrthoMCL 10        | <i>AeAnn11, BdAnn11, HvAnn11, OsAnn11, TaAnn11, TuAnn11, AeAnn12, BdAnn12, HvAnn12, OsAnn12, TaAnn12, TuAnn12</i> |                               |

The orthologs of *Ann1-12* genes among *T.aestivuma*, *T.urartu*, *A.tauschii*, *H. vulgare*, *O.sativa* and *B.distachyon* were identified by OrthoMCL (v1.4) software with the P value of 1e-20.
