# Supplementary material for: Comprehensive analyses of the annexin gene family in wheat
Source: PubMed Central journal article supplement (PMC4884362; doi:10.1186/s12864-016-2750-y), 2016-05-28
Supplement: 12864_2016_2750_MOESM8_ESM.pdf [file 12864_2016_2750_MOESM8_ESM.pdf]

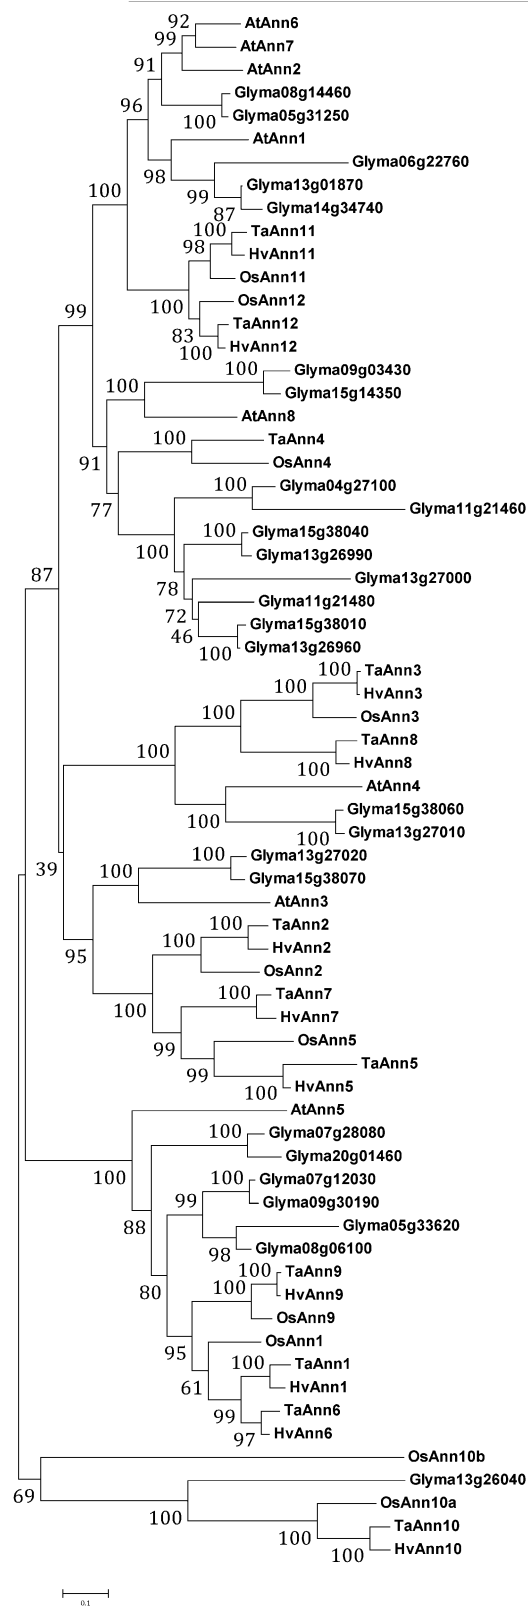

**Additional file 8: Figure S3.** Phylogenetic analysis of annexin protein sequences from three monocots (wheat, barley and rice) and two dicots (*Arabidopsis thaliana* and *Glycine max*).
