# Supplementary material for: Comprehensive analyses of the annexin gene family in wheat
Source: PubMed Central journal article supplement (PMC4884362; doi:10.1186/s12864-016-2750-y), 2016-05-28
Supplement: 12864_2016_2750_MOESM10_ESM.pdf [file 12864_2016_2750_MOESM10_ESM.pdf]

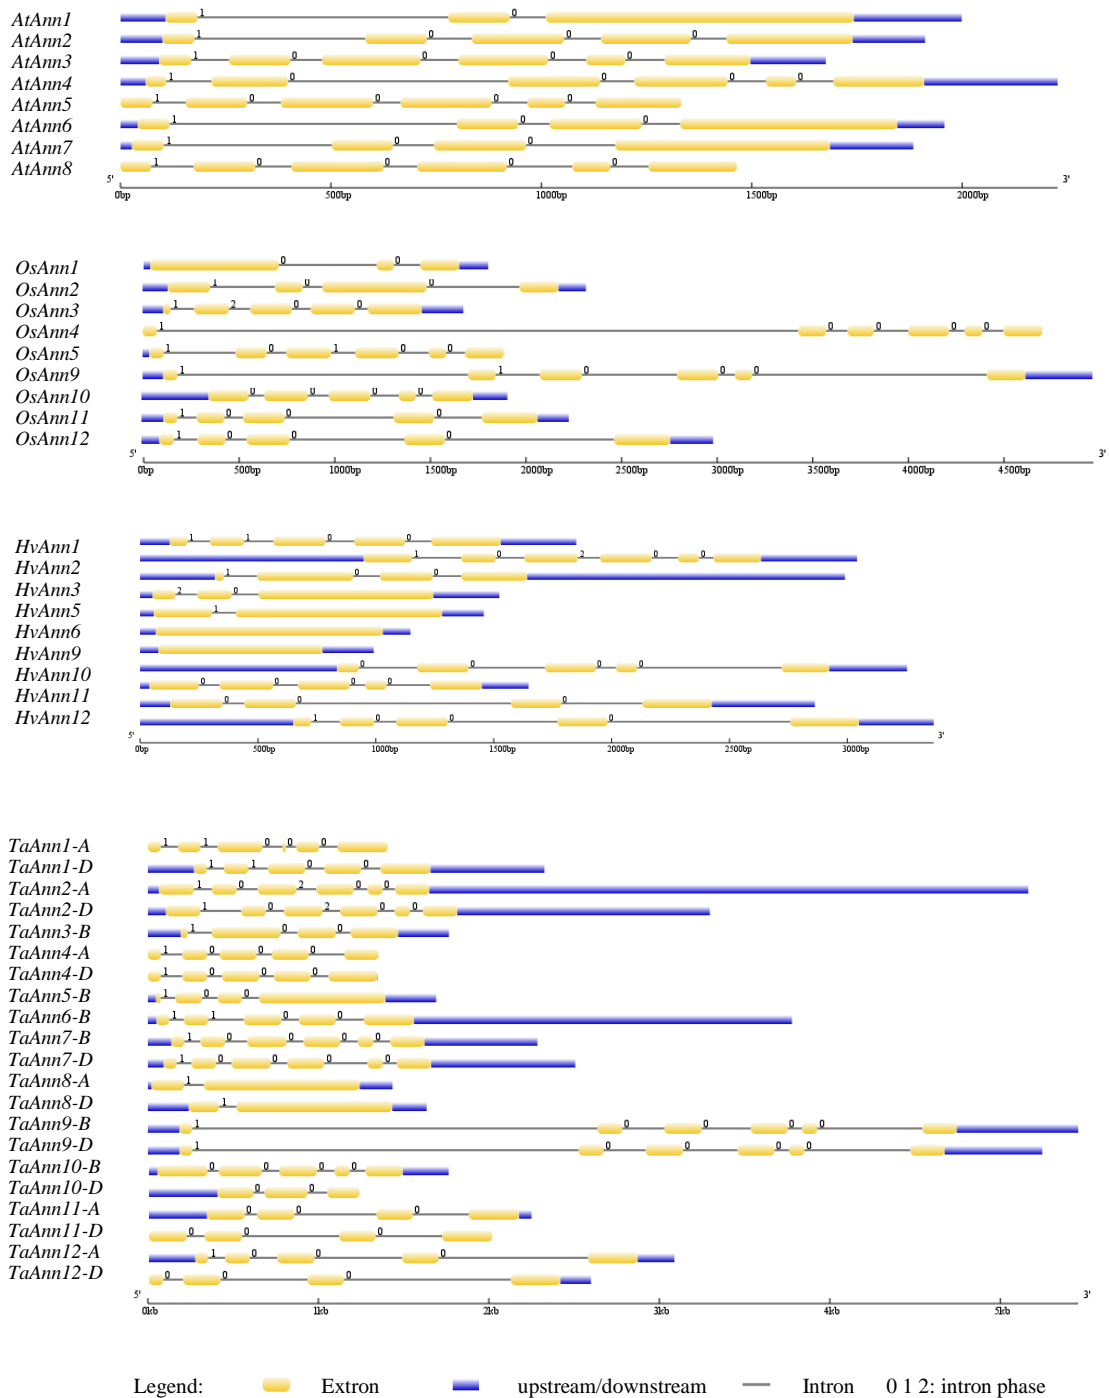

**Additional file 10: Figure S5. Gene Structure analysis of Arabidopsis, rice, barley and wheat annexin genes.** Gene structures were generated from GSDS (<http://gsds.cbi.pku.edu.cn/chinese.php>). Exons, UTRs, introns and intron phases are shown.
