# Supplementary material for: Comprehensive analyses of the annexin gene family in wheat
Source: PubMed Central journal article supplement (PMC4884362; doi:10.1186/s12864-016-2750-y), 2016-05-28
Supplement: 12864_2016_2750_MOESM11_ESM.pdf [file 12864_2016_2750_MOESM11_ESM.pdf]

**Additional file 11: Table S6.** Putative cis-elements in the 2 kb upstream promoter region of translation start site in wheat annexin genes.

| <b>Gene name</b> | <b>ABRE</b> | <b>DRE/CRT</b> | <b>LTRE</b> |
|------------------|-------------|----------------|-------------|
| <i>TaAnn1-D</i>  | 1           | 3              | 4           |
| <i>TaAnn2-A</i>  | 4           | 0              | 0           |
| <i>TaAnn2-D</i>  | 3           | 0              | 0           |
| <i>TaAnn3-B</i>  | 3           | 0              | 2           |
| <i>TaAnn5-B</i>  | 2           | 0              | 2           |
| <i>TaAnn6-B</i>  | 0           | 1              | 1           |
| <i>TaAnn7-B</i>  | 3           | 6              | 8           |
| <i>TaAnn7-D</i>  | 1           | 2              | 1           |
| <i>TaAnn8-A</i>  | 3           | 2              | 3           |
| <i>TaAnn8-D</i>  | 2           | 2              | 1           |
| <i>TaAnn9-B</i>  | 7           | 7              | 0           |
| <i>TaAnn10-B</i> | 5           | 5              | 3           |
| <i>TaAnn10-D</i> | 3           | 1              | 4           |
| <i>TaAnn11-A</i> | 1           | 1              | 3           |
| <i>TaAnn12-A</i> | 4           | 5              | 10          |
