# Supplementary material for: Comprehensive analyses of the annexin gene family in wheat
Source: PubMed Central journal article supplement (PMC4884362; doi:10.1186/s12864-016-2750-y), 2016-05-28
Supplement: 12864_2016_2750_MOESM13_ESM.pdf [file 12864_2016_2750_MOESM13_ESM.pdf]

**Additional file 13: Full set of annexin sequences from wheat (*T. aestivum*), barely (*H.vulgare*), *T.urartu* and *A.tauschii*.**

The sequences below are the complete collection of full length cDNA/mRNA sequences for annexin genes from barely (*H.vulgare*), *T.urartu* and *A.tauschii*. Sequences derived solely from GB ESTs may not be eligible for submission to GB as third party annotations. Sequences derived from Triticale hiseq2000 EST libraries which are identical to *T. aestivum* annexin are eligible for submission and this is in progress.

**(1). Wheat (*T. aestivum*)**

>TaAnn1-A

MASLSVPPVLTTPRDDAVALHKAFKFGGCDSTTVTNILAHRDSAQRALILHEYKAIYHQDLYHRLATELSG  
NHKCSRNEPAWLWLQNAMLLWVLDPVGRDATILNQALNSDITDLRAATEVICSRTPSQLQIMKQTYRARF  
GCYLEHDITERTYGDHQKLLLAYLGLYQAGEKRVGTDERAFIRIFERSWAHMVSVANAYQHMYARSLEK  
AVKSETTGNFQFGLLTILRCADTPAKYFAKVLHKAMKGLGTSNAALTRVAVTRTEVDMKYIKAETHNKYK  
GSLAEAIHSETSGNYRTFLLSLVGWDR

>TaAnn1-D

MASLSVPPVLTTPRDDAVALHKAFKFGGCDSTTVTNILAHRDSAQRALILHEYKAMYHQDLYHRLATELS  
GNHKNAMLLWVLDPAGRDATILNQALNGDITDLRAATEVICSRTPSQLQIMKQTYRARFGCYLEHDITERT  
YGDHQKILLAYLGVPRNEGPEVDPSAVTDDARELYRAGEKRVGTDERAFIRIFTESSRAHLVSIANAYQHM  
YARSLEKTLKSETTGNFQFGLLTILRCADTPAKYFAKVLHKAMKGLGTSNAALIRVAVTRTEVDMKYIKAE  
YHNKYKGSLEAIHSETSGNYRTFLLSLVGRDR

>TaAnn2-A

MCGWCGCLECIHNIPPLNLLFLHFSSAARTGREGGEGARTLSPMASISVPDPAPSPTEDAESIRKAVQGWGT  
DENALIEILGHRATAQRAEIAVAYEGLYDKPLLRTLQDELSSHFKGAMTLWAMPAAARDAKLAYKALRKK  
GGDRHAWVLIEVACASSPDHLVAVRKAYCSAYDSSLEEDVAACPLYKDPLKQFLVRLVSSYRHGGEHVDG  
ELARAEAAELHGAVAACKQPLHGDVVRIVSSRSKPQLKATFQHYKREHGKAIDEVLEGNRNDKLSAMLK  
TAVWCLTSPEKHFAEVIRSSIIGLGTDEESLTRAIVSRAEVDLKKVKEEYKVRYKTTVTKDVGDTSGYYQ  
GILLTLIGAE

>TaAnn2-B

MCGWCCCLECIHNIPPLNLLFLHFSSAPRTGRDGEGARTLSPMASISVPDPASSPTEDAENIRKAVQGWGT  
DENALIEILGHRATAQRAEIAVAYEGLYDKPLLRTLQDELSSHFKGAMTLWTMDPAARDAKLAYKALRKK  
GGDRHAWVLIEVACASSPDHLVAVRKAYCSAYDSSLEEDVAACPLYKEPLKQFLVRLVSSYRDGGDHVDG  
ELARAEAAELHGAVAACKQPLHGDVVRIVSSRSKPQLKATFQHYKREHGKAIDEVLEGNRNDKLSAMLK  
TAVWCLTSPEKHFAEVIRSSIIGLGTDEESLTRAIVSRAEVDLKKVKEEYKVRYKTTVTKDVGDTSGYYQ  
GILLTLIGAE

>TaAnn3-A

MADEVQALTKAFSGLGGLGVDEPTMVAALANWRKQPEKRSFGRKSFPLFKEHGVIERCEDEYMLHLA  
AEFSRFKNMLVWAMHPWERDARLAHHVLHQAHPAAILVEVACTRSAEELGARKAYMALFHHSLEEDV  
AYRAKDKPYCSLLVGLVSAYRYEGPKVSDDTAKAEAKALGAAVKSAAAGGKLVENDEVVRILTTRSKPHLV  
QTFKYKELHGKHIQEDLGSEEALREAVQCLATPERYFSQVMAAALREGADHHGKEALARVAVTRSDVD  
MDGIRAAEQEFGAKLEDAVAGSAHGFKDALVSLIVGK

>TaAnn3-B

MADEVQALTKAFSGLGGLGVDEPTMVAALANWRKQPEKRSQFRKSPGLFKEHGVIERCEDEYMLHLA  
AEFSRFKNLMVLWAMHPWERDARLAHHVLHQAHPSAIVVEIACTRS AEELLGARKAYMALFHHSLEEDV  
AYRAKDPKPYCSLLVGLVSAYRYEGPKVSDDTAKAEAKALGAAVKSAAAGKLVENDEVVRILTTRSKPHLV  
QTFKYYKELHGKHIEEDLGSEEALRETVQCLATPERYFSQVMAAALREGADHHGKEALSRAVAVTRSDVD  
MDGIRAAYQE QFGAKLEDAVAGSAHGHEFKDALVSLIVGK

>TaAnn4-A

MTTITVPQVVPSPVEDAEALMKAFQGWGTDEQAVIYILAHRDAAQRKLIRQAYEKEYNELLDRLQSELS  
GDLQTAMGYWVLDPTERQAVIANAATKCIDEYYPVIVEIACANSPAELEVKQAYHAIYKRSLEEDVAAGA  
TGNLRNLLVALVSTYRYDGDEVNGGLARSEAKIIQADVKNVGTADHGELIRVLGTRSRAQLGATFNCFRD  
EHGTTVTKVLNRNAMHKSQGTDEESLLRVVVMHAEKDLRAIKDEFHRRASVALEQAIKETSQDFKTFIMAL  
VGTSQ

>TaAnn4-D

MATIKVPQVVPSPVEDAEALMKAFQGWGTDEQAVIYILAHRDAAQRKLIRLAYEKEYDER  
LTDRLSELSGDLQTAMGYWVLDPTERQAVIANAATKCIDEYYPVIVEIACANSPAELEVKRAYHAIYKR  
SLEEDVAAGATGNLRNLLVALVSAYRYDGDEVNGGLARSEAKIIQADVKNVGTADHGELIRVLGTRSRAQ  
LGATFNCFRDEHGTTVTKALLHAPDTTGYARALRTAARCIADTDKYFAKVLNRNAMHKSQGTDEESLLRVV  
VMRAEKDLRGKDEFHKKRASVALEQAIKE  
ASGDFKTFITALVGT

>TaAnn5-B

MSAIVVPSPVSPSDDAEGIRKALQGW RADKEALVRILAGPLLNSFRQLSRQYCPVTVDFWKAILWTM  
DPAERDANLVH GALRRRGDGDHLAVLVEVSCASDPDHLVAVRRAYRSLFGCSVEDLASCAALQQPLRKM  
LVSLVSSYRYGGDRVDADVAKLEASQLSEAVRKKQPHHDEVVQILGTRSKPQLRATLRRYREDHGT DIVE  
DIDSRCSSQFARTLKS AVWCLTSPEKHFAEMIRESV VGLGT YEDMLTRVVVSRAEIDMKQIKEEYRARFKT  
TVTCDVVDDTSFGYKDILLALVGCEEE

>TaAnn6-A

MASLSVPPVLTSPRHDAIALHRAFKGFGCDSTTVINILAHRDAVQRGLIMQEYRAIYHQDLYHRLSTELSG  
NHKKAMLLWVLDPVGRDATILNQLNGDITDLRAATEVICSRTPSQLQIMKQTYRARFGCYLEQDITERTY  
GDHHKLLLAYLGIPRYEGPEVDPAAAARDARELYRAGEKRLGTDERAFIRVFTERS WAHLAAVAGAYHHL  
YARSLEKAVKSETSGTFEFGLLTILRCAESPARYFAKALHKAMKGLGTS DTTLIRVVVTRAEVDMQYIKAE  
YHKKYKRS LADAIHSETSGNYRTFLLSLVGRDR

>TaAnn6-A

MASLSVPPVLTSPRHDAIALHRAFKGFGCDSTTVINILAHRDSAQRALILHEYKAMYHQDLYHRLATELS  
GNHKNAMLLWVLDPAGRDATILNQLNGDITDLRAATEVICSRTPSQLQIMKQAYRARFGCYLEHDITERTY  
YGDHQKLLLAYLG VRRNEGPEVDPSAVTDDARELYQAGEKRVGTDERAFIRIFSERSWAHMVSVANAYQ  
HMYARSLEKAVKSETTG NFQFGLL TILRCADTPAKYFAKVLHKAMKGLGTSNAALTRVAVTRTEVDMKYI  
KAEYHNKYKGLAEAIHSETSGNYRTFLLSLVGRDR

>TaAnn6-B

MASLSVPPVLTSPRHDAIALHRAFKGFGCDSTTVINILAHRDAVQRALIMQEYRAMYRQDLYHRLSTELSG  
NHKKAMLLWVLDPVGRDATILNQLNGDITDLRAATEVICSRTPSQLQIMKQAYRARFGCYLEQDITERTY  
GDHQKLLLAYLGIPRYEGPEVDPAAAARDARELYRAGERRLGTDERAFIRVFTERS WAHLAAVAGAYHHL  
YARSLEKAVKSETSGTFELGLLTILRCAESPARYFAKALHKAMKGLGTS DTTLIRVVVTRAEVDMQYIKAE  
YHKKYKRS LADAIHSETSGNYRTFLLSLVGRDR

>TaAnn7-B

MATIAVPTPLPSAADAESLRNAVQGWGTDEKALVEILGRRTAAQRAEIRRAYASLYKESLLTRLHDELSGH

FQKAMVLLATDPAERDAKLVREALGRRGDDRDWVLEAACAATPEHLVAVRRAYRSLHGSSLEEDVAA  
CSAFQEPLRKLKLVSLVRSYRCAEESVDMVAKLEAAQLAEAVRRKKQPHGGEVVVRIVSTRSKSQAATFR  
CYKEQHGS DIEEDMKQYSSSQFARMLKIAVWCLTSPEKHAEVIRYSILGLGTDEDLTLTRAIVSRADIDME  
KIKQEYRVRFKTTVTDDVVGDTSRYYMDILLALVGKE

>TaAnn7-D

MATIDVPTPVPSAADADSLRNAVQGWGTDEKALVEILGRRRTAAQRAEIRRAYASLYKESLLTRLHGELSG  
HFQKAMVLLATDPAERDAKLAREALGRRGDDRDWVLEAACAAPDHLVAVRRAYRSLHGSSLEEDVA  
ACSAFQEPLRKLKLVSLVRSYRCAEESVDMVAKLEAAQLAEAIRRKKQPHAGEVVVRIVSTRSKPQLAATF  
RCYKEQHGS DIEEDMKQYSSSQFARMLKIAVWCLTSPEKHFAEVIRYSILGLGTDEDALTRAIVSRADIDM  
KKIKQEYRVRFKTTVTDDVVGDTSGYYMDILLALVGKE

>TaAnn8-A

MQQFLAAQPSSNGSTAAAAAAPPSPSPLSRPPRRRQQQSIVKEATMADEHQELTKAFSGMGGLGV  
EETALVSALGRWRKQPEKRAQFRRGFPGFFAPAAAGAGAGAIERCSDDYVRHLKTEFARFKTLMVLWAM  
HPWERDARWAHRALHKKHHPVAVLVELACTRAADELLGARRAYHALYHRSLEEDVAYRVKDAAAANRLL  
LGLVTAYRYEGPRVDEELAKEEAAALSAGAGAKAAQSELVVRVLATRSKPQLRATFRLYRELHGKPLEEEFG  
GEAPCLREAVRCLESPARYFGEVIDGAFKEGADKQAKAALTRVVVSRSDADMEEIKEAYLKQHGDKLVD  
VAKNTHGHYRDALLAMIGK

>TaAnn8-D

MQQFLAAQPSSNGSTAAAAAPPSPSPLSRPPRRRQQQSIKEATMADEHQELTKAFSGMGGLGVEETA  
LVSALGRWRKQPEKRAQFRRGFPGFFEPAAAGAIERCSDDYVRHLKTEFARFKTLMVLWAMHPWERDAR  
WAHRALHKKHHPASVVELACTRAADELLGARRAYHALYHRSLEEDVAYRVKDAAAANRLLGLVTAYRY  
EGPRVDEELAREEAAALSAGPGAGAKAQSQSELVVRVLATRSKPQLRATFRLYRELHGKPLEEEFGDAP  
CLREAVRCLESPAKYFGEVIDGAFKEGADKQAKAALTRVVVSRSDADMEEIKEAYLKQHGAKLVD  
VAKNTHGHYRDALLAMIGK

>TaAnn9-B

MASLTLPAPPNPRQDAIDLHKAFKGFCDSTTVSNILHRDSMQRGYIQQEYKTMYSSELSRRISSELSG  
NHKKAMSLWILDPAGRDATVLKEALS AESLDLKAATDIICSRTPSQLQIMKQTYAKFGTYLEHDISQQAS  
GDHQKILLAYVGIPRYEGPEVDPTIVTHDAKDLYKAGEKKLGTDEKTFIRIFTERS WAHMAAVASAYHHM  
YDRSLQKVVKNETSGNFEVALLTILRCAENPAKYFAKVLKSMKGLGTDDKTLVRVVVTRTEIDMQYIKA  
EYKYYKKPLADAIHSETSGGYRTFLLSLVGSH

>TaAnn9-D

MASLTLPAPPNPRQDAIDLHKAFKGFCDSTTVSNILSHRDSMQRGYIQQEYKTMYSSELSHRISSELSGN  
HKKALSLWILDPAGRDATVLKEALS AESLDLKAATDIICSRTPSQLQIMKQTYAKFGTYLEHDISQQASG  
DHQKILLAYVGIPRYEGPEVDPTIVTHDAKDLYKAGEKKLGTDEKTFIRIFTERS WAHMAAVASAYRHM  
YDRSLQKVVKNETSGNFEVALLTILRCAENPAKYFAKVLKSMKGLGTDDKTLVRVVVTRTEIDMQYIKAE  
YKYYKKPLADAIHSETSGGYRTFLLSLVGSH

>TaAnn10-A

MAARSPAAAGFENE CREIHGACDEPRRLSRLLAHRSASERQQIKATYRAMFGEDLAGRLHKTTLANQDNE  
LCNLLYLWMLDLAERDAIMARDAIESGAAADYRALVEVFTRRKQDQLFFTKQAYLARFKKNLEQDMVT  
DPSPHYQRLLVALATSHKSHHDEPSQHIAKCDARRLYDAKNGGGTGSVDEAAILEMFSKRSIPQLRLALCS  
YKHIYGHDFTKALKKNLARDFEESLRVVVKCIYTPSKYYCKLLQRSMQRPEADKRLVTRAILGSDDVGIN  
EIKLAFKSNFGKNLADFIHESLPQSDYREFLWLWQGGQCLVAS

>TaAnn10-B

MAARSPAAAGFENE CREIHGACDEPRRLSRLLAHRSASERQQIKATYRAMFGEDLAGRLHKTTLANQDNE  
SQHGLPLQCNLLYLWMLDLAERDAIMARDAIESGAAADYRALVEVFTRRKQDQLFFTKQAYLARFKKN

LEQDMVTDPSHPYQRLLIATSHKSHHDEPSQHIAKCDARRLYDAKNGGGTGSVDEAAVLEMFSKRSIP  
QLRLALCSYKHIYGHDFTKALKKNLARDFEESLRVVVKCIYTPSKYYCKLLQRSMQRPEADKRLVTRAIL  
GSGDVGINEIKLAFKSNFGKNLADFIHESLPQSDYREFLWLWQGGQCPVAS

>TaAnn10-D

MAARSPAAAGFENEHREIHGACDEPRRLSRLLAHRSASERQQIKATYRAMFGEDLAGRLHKTTLANQDNE  
SQHGLPLQLCNLLYLWMLDLAERDAIMARDAIESGAAADYRALVEVFTRRKQDQLFFTKQAYLARFKKN  
LEQDMVTDPSHPYQRLLVALATSHKSHHDEPSRHIKCDARRLYDAKNGGGTGSVDEAAILEMFSKRSIP  
QLRLALCSYKHIYGHDFTKALKKNLAGDFEESLRVVVKCIYTPSKYYCKLLQRSMQRPEADKRLVTRAIL  
GSSDVGINEIKLAFKSNFGKNLADFIHESLPQSDYREFLWLWQGGQCLVAS

>TaAnn11-A

MATLSVPAAVPAVAEDCEQLRKAFAGWGTNERLIVSILAHRDAAQRRAIRRAYAEAYGEELLRAIGDEIHG  
KFERAVIQWTLDPAPERDAELANEEAKKWQPGGRALVEIACARTPAQLFAAKQAYHDFRFRSLEEDVAAH  
VTGDFRKLPLVPLVSAYRYDGPEVNTSLAHSEAKLLNGKINEKAYSDDDEVVRLITRTRSKAQLLATFNNSYNDQ  
FSPITKDLKEDPKNEFLSTLRAIIRCFTCPDRYFEKVRLALGGVGTDEDTLTRVITTRAEVDLKVIKEAY  
QKRNSVPLEKAVSKETSRYEDMMLALLGAEY

>TaAnn11-B

MATLSVPAAVPAVAEDCEQLRKAFAGWGTNERLIVSILAHRDAAQRRAIRRAYAEAYGEELLRAIGDEIHG  
KFERAVAQWTLDPAPERDAELAGEEAKKWQPGGRALVEIACARTPAQLFAARQAYHDFRFRSLEEDVAAH  
VTGEFRKLLVPLVSAYRYDGPEVNTSLAHSEAKILNGKINEKAYSDDDEIIRILTTRSKAQLLATFNNSYNDQFS  
HPITKDLKEDPKNEFLSTLRAIIRCFTCPDRYFEKIIRLALGGVGTDETLTRVITTRAEVDLKVIKEAYQKR  
NSVPLDKAVSKETSRYEDMMLALLGAEY

>TaAnn11-D

MATLSVPAAVPAVAEDCEQLRKAFAGWGTNERLIVSILAHRDAAQRRAIRRAYAEAYGEELLRAIGDEIHG  
KFERAVTQWTLDPAPERDAELAGEEAKKWQPGGRALVEIACARTPAQLFAAKQAYHDFRFRSLEEDVAAH  
VTGDFRKLPLVPLVSAYRYDGPEVNTSLAHSEAKILNGKINEKAYSDDDEIVRILTTRSKAQLLATFNNSYNDQF  
SHPITKDLKEDPKNEFLSTLRAIIRCFTCPDRYFEKVRLALGGVGTDETLTRVITTRAEVDLKVIKEAYQ  
KRNSVPLEKAVSKETSRYEDMMLALLGAEY

>TaAnn12-A

MATLKVPSNVPALADDCDNLKAFQGWGTNEALIISILGHRDASQRRAIRKHYADTYGEELRSITDEISGD  
FERAVILWTLDPAPERDAVLANETARKWHPGNPVLVEIACARGSKQLFAVRQAYHRFRSLEEDVASHVTG  
DFRKLPLVPLVSSHRYEGPEVNTRLAHSEAKLLHEKIEHKAYADDEVIRILTTRSKAQLLATFNNSYNDTFGHP  
ITKDLKADPKDEFKTLRAVIRCFTCPDRYFEKVARVAIAGNGTDENSLTRVITTRAEVDLKLIKEAYQKR  
NSVPLEKAVAGDTSGDYESMMLALLGKE

>TaAnn12-D

MATLKVPSNVPALADDCDNLKAFQGWGTNEALIISILGHRDAAQRRAIRKHYADTYGEELRSITDEISG  
DFERAVILWTLDPAPERDAVLANETAKKWHPGNPVLVEIACARGSKQLFAARQAYHDFRFRSLEEDVAAHV  
TGDFRKLPLVPLVSSHRYEGPEVNTRLAHSEAKLLHEKIEHKAYGDDEVIRILTTRSKAQLLATFNNSYNDTF  
GHPITKDLKADPKDEFKTLRAVIRCFTCPDRYFEKVARLAIAAGNGTDENSLTRVITTRAEVDLKLIKEAYQ  
KRNSVPLEKAVAGDTSGDYESMMLALLGKE

>TaAnn1-A

ATGGCGAGCCTGAGCGTGCCTCCGGTGCTCACGCCTCCGCGTGATGACGCCGTCGCTCTCCACAAGGC  
CTTCAAAGGGTTCCGGCTGCGACAGCAGCAGCGGTGACTAACATACTTGCTCACCGCGACTCGGCGCAG  
CGCGCGCTCATCTGCACGAGTACAAAGCCATATACCATCAGGATCTCTACCATCGCCTAGCAACTGAA  
CTGAGTGGAACCAAGTGCTCCCGAAACGAACCTGCATGGCTGTGGTTGCAGAATGCTATGCTGCT

TTGGGTCTCGACCCCGTGGGGCGTGACGCGACCATACTGAACCAGGCTCTCAACAGCGACATCACC  
GACCTGAGAGCCGCCACGGAGGTAATCTGCTCCAGGACGCCGTCGCAGCTGCAGATCATGAAGCAA  
CCTACCGCGCGAGGTTTCGGTTGCTACCTCGAGCATGACATCACCGAACGCACCTACGGTGATCATCAG  
AAGCTTTTGGCTTGGCTACCTGGGACTGTATCAAGCCGGCGAGAAGAGGGTGGGCACCGATGAGCGGG  
CCTTCATCCGCATCTTCAGCGAACGCAGCTGGGCGCACATGGTGTCCGTGGCCAACGTTACCAGCAC  
ATGTACGCCCCGGTCCCTGGAGAAGGCCGTGAAGAGTGAGACGACAGGGAACCTCCAGTTCGGGCTGC  
TGACCATCTCAGGTGCGCCGACACTCCGGCAAAGTACTTTGCCAAGGTCCTGCACAAGGCGATGAA  
AGGCTGGGCACCAGCAACGCGGCGCTCACACGGGTGGCGGTGACGAGGACCGAGGTTGACATGAA  
GTACATCAAGGCAGAGTACCACAACAAGTACAAGGGTTCGCTGGCTGAAGCTATCCACTCCGAGACG  
TCGGGGAACCTACCGAACCTTCCTCCTCTCACTCGTCGGCTGGGACCGCTAA

>TaAnn1-D

ATGGCGAGCCTGAGCGTGCCTCCGGTGTACGCCCCCGCGGATGACGCCGTCGCTCTCCACAAGG  
CCTTCAAAGGTTTCGGCTGCGACAGCACGACGGTGACCAACATACTTGCTCACCGCGACTCGGCGCA  
GCGCGCGCTCATCTGCACGAGTACAAAGCCATGTACCATCAGGATCTCTACCATCGCCTAGCAACCG  
AGCTGAGTGAAACCACAAGAATGCTATGCTGCTTTGGGTCTCGACCCTGCTGGGCGTGATGCGACC  
ATACTGAACCAAGCTCTCAACGGCGACATCACCAGCTGAGAGCCGCCACCGAGGTTATCTGCTCCAG  
GACGCCGTGCGAGCTGCAGATCATGAAGCAAACCTACCGTGCAGGTTTCGGTTGCTACCTCGAGCATG  
ACATCACCGAACGCACCTATGGAGATCATCAGAAGATTTGCTTGCCTACCTGGGAGTCCCACGCAAC  
GAAGGCCCGGAAGTTGATCCTTCGGCGGTGACAGACGACGCGAGGGAGCTGTATAGGGCCGGCGAG  
AAGAGGGTGGGCACCGATGAGCGGGCCTTCATCCGCATCTTCACCGAAAGCAGCAGGGCACACCTGG  
TGTCATCGCCAACGCTTACCAGCACATGTACGCCCCGGTCCCTGGAGAAGACCCTGAAGAGTGAGAC  
GACAGGGAACCTCCAATTCGGGCTGCTGACCATCCTCAGGTGCGCCGACACTCCGGCAAAGTACTTTG  
CCAAGTCTCTGCACAAGGCGATGAAAGCCCTGGGCACCAGCAACGCGGCGCTCATAAGGGTGGCGG  
TGACGAGGACCGAGGTCGACATGAAGTACATC  
AAGGCAGAGTACCACAACAAGTACAAGGGTTCGCTGGCTGAAGCTATCCACTCCGAGACGTCAGGGA  
ACTACCGAACCTTCCTCCTCTCGCTCGTCGGCCGGGACCGCTAA

>TaAnn2-A

ATGTGTGGCTGGTGC GGCTGCCTCGAGTGCATCCATAACATCCCTCCCCTCAATCTCCTCTTCCCTCCAC  
TTCTCCTCGGCTGCACGGACGGGAAGGGAGGGAGAAGAAGGAGCGGAACGCTCAGCCCCATGGCC  
TCCATCTCGGTCCCGACCCCGCCCTTCCCCGACCGAGGATGCAGAGAGCATCAGAAAAGCAGTGC  
AAGGGTGGGGGACGGACGAGAACGCGCTGATCGAGATCCTGGGCCACCGGACGGCGGCGCAGCGCG  
CGGAGATCGCCGTCGCCTACGAGGGCCTTACGACAAGCCCTCCTCCGCACGCTCCAGGACGAGCT  
CTCCAGCCACTTCAAAGGGCGGATGACGCTGTGGGCGATGGACCCGGCGGCGGGACGCCAAGCTG  
GCCTACAAGGCCCTCAGGAAGAAGGGCGGCGACCGGCACGCCTGGGTGCTCATCGAGGTCGCCTGCG  
CGTCGTCGCCGGACCACCTCGTCGCCGTCAGGAAGGCCACTGCTCCGCTACGACTCGTCGCTCGAG  
GAGGACGTCGCCGCTGCCGCTTACAAGGACCCCTCAAGCAGTTCTTGGTGCGCCTGGTGAGCT  
CGTACCGCCACGGCGGCGAGCACGTCGACGGCGAGCTGGCGAGGGCCGAGGCGGCCGAGCTGCACG  
GCGCGGTGGCGGCCAAGAAGCAGCCGCTGCACGGGGACGTGGTCCGCATCGTCAGCTCCAGGAGCA  
AGCCGCAGCTCAAGGCGACGTTCCAGCACTACAAGCGAGAGCACGGCAAGGCCATCGACGAGGTTT  
TCGAGGGCAATCGCAACGACAAGCTGTGCGGATGCTGAAAACCTGCGGTCTGGTGCCTGACATCGCC  
GGAGAAGCACTTCGCAGAGGTGATCCGGAGCTCGATCATCGGGCTCGGCACCGACGAGGAATCCCTG  
ACCAGAGCGATTGTCTCGCGCGCCGAGGTGCACTTGAAGAAAGTGAAGGAGGAATACAAGGTGAGGT  
ACAAGACGACGGTGACCAAGGATGTCGTCGGAGACACCTCCGGTACTACCAGGGCATCCTGCTCAC  
CCTCATCGGGGCCGAGTAG

>TaAnn2-B

ATGTGTGGCTGGTGTCTGCTGCCTCGAGTGCATCCATAACATCCCTCCCCTCAATCTCCTCTTCCCTCCACT  
TCTCCTCGGCTCCACGGACGGGAAGGGACGGAGAAGGAGCACGAACCCTCAGCCCCATGGCCTCCAT  
CTCGGTCCCGGACCCTGCCTCTTCCCCAACCGAGGATGCAGAGAACATAAGGAAAGCAGTACAAGGG  
TGGGGGACGGACGAGAACCGCTGATCGAGATCCTGGGCCACCGGACGGCGGCAGCGCGCGGAG  
ATCGCCGTGGCCTACGAGGGCCTCTACGACAAGCCCCTCCTCCGCACGCTCCAAGACGAGCTCTCCAG  
CCACTTCAAGGGCGCGATGACGCTGTGGACGATGGACCCGGCGGCGGGACGCCAAGCTGGCCTAC  
AAGGCGCTCAGGAAGAAGGGCGGGCACCAGGCACGCCTGGGTGCTCATCGAGGTGCTGCTGCGCGTCTG  
TCGCCGACCACCTCGTCGCCGTCAGGAAGGCCTACTGCTCCGCCTATGACTCGTCGCTCGAGGAGGA  
CGTCGCCGCTGCCCGCTCTACAAGGAGCCCCTCAAGCAGTTCTTGGTGCCTGGTGAGCTCGTACC  
GCGACGGTGGCGACCACGTCGACGGCGAGCTGGCGAGGGCGGAGGCGGCCGAGCTGCACGGCGCGG  
TGGCGGCCAAGAAGCAGCCGCTGCACGGGGACGTGGTCCGCATCGTCAGCTCCAGGAGCAAGCCGC  
AGCTCAAGGCGACGTTCCAGCACTACAAGCGAGACGCGCAAGGCCATCGACGAGGTTCTCGAGG  
GGAATCGCAACGACAAGCTCTCGGCGATGCTGAAAACCTGCGGTCTGGTGCCTGACATCGCCGAGAA  
GCACTTCGACAGAGGTGATCCGGAGCTCAATCATCGGGCTCGGCACCGACGAGGAATCCCTGACCAGA  
GCGATCGTCTCGCGCGCCGAGGTCGACTTGAAGAAAGTCAAGGAGGAATAACAAGGTGAGGTACAAG  
ACGACGGTGACCAAGGATGTCGTCGGCGACACTTCCGGCTACTACCAGGGCATCCTGCTCACCCTCAT  
CGGGGCCGAGTAG

>TaAnn3-A

ATGGCCGACGAAGTTCAGGCGCTCACCAAGGCCTTCTCAGGTCTGGGAGGTCTGGGCGTGGACGAGC  
CGACGATGGTGGCGGCGCTGGCGAACTGGCGGAGGCAGCCGGAAGCGGTCCGGGTCCGAAAGA  
GCTTCCCGGGGCTGTTCAAGGAGCACGGCGTGATCGAGCGGTGCGAGGACGAGTACATGCTGCACCT  
GGCCGCCGAGTTCTCCCGTTCAAGAACCTCATGGTGTGTGGGCGATGCACCCGTGGGAGCGCGAC  
GCCCCGCTCGCGCACACGTCCTCCACCAGGCCACCCGCGCCATCGTCGTGGAGGTCGCCTGCA  
CCCCTCCGCCGAGGAGCTCCTCGGCGCGCGCAAGGCCTACATGGCGCTCTTCCACCACTCCCTCGAG  
GAGGACGTCGCCTACCGCGCCAAGGACAAGCCATACTGCAGCCTGCTGGTGGGGCTGGTGGAGCGCGT  
ACCGGTACGAAGGGCCCAAGGTGAGCGACGACACGGCCAAGGCGGAGGCCAAGGCGCTGGGCGCG  
GCGGTGAAGAGCGCCCGCGGCAAGCTGGTGGAGAACGACGAGGTGGTCAGGATCCTCACCACC  
AGGAGCAAGCCTCACCTCGTCCAGACCTTCAAGTACTACAAGGAGCTGCACGGCAAGCACATCGAGG  
AGGATCTGGGAAGCGAGGAGGCTCTGAGGGAGACCGTGCAGTGCTGGCGACGCCGAGAGGTA  
TCAGCCAGGTGATGGCGGCGGCGCTGAGGGAGGGCGCGGACCACCACGGGAAGGAGCCCTGTTCG  
GGGTGGCGGTGACGCGGTGCGACGTGGACATGGACGGCATCAGGGCGGCCTACCAGGAGCAGTTCTG  
GGCCAAGCTCGAGGACGCCGTCGCCGCGACGCGCACGGGCACTTCAAGGACGCGCTCGTCTCGCT  
CATCGTCGGCAAGTAA

>TaAnn3-B

ATGGCCGACGAAGTTCAGGCGCTCACCAAGGCCTTCTCAGGTCTGGGAGGTCTGGGCGTGGACGAGC  
CGACGATGGTGGCGGCGCTGGCGAACTGGCGAAGCAGCCGGAAGCGGTCCGGGTCCGAAAGA  
GCTTCCCGGGGCTGTTCAAGGAGCACGGCGTGATCGAGCGGTGCGAGGACGAGTACATGCTGCACCT  
GGCCGCCGAGTTCTCCCGTTCAAGAACCTCATGGTGTGTGGGCGATGCACCCGTGGGAGCGCGAC  
GCCCCGCTCGCGCACACGTCCTCCACCAGGCCACCCGTCGCCATCGTCGTGGAGATCGCCTGCAC  
CCGCTCCGCCGAGGAGCTCCTCGGCGCGCGCAAGGCCTACATGGCGCTCTTCCACCACTCCCTCGAG  
GAGGACGTCGCCTACCGCGCCAAGGACAAGCCATACTGCAGCCTGCTGGTGGGGCTGGTGGAGCGCGT  
ACCGATACGAAGGGCCCAAGGTGAGCGACGACACGGCCAAGGCGGAGGCCAAGGCGCTGGGCGCGG  
CGGTGAAGAGCGCCCGCGGCAAGCTGGTGGAGAACGACGAGGTGGTCAGGATCCTCACCACCA  
GGAGCAAGCCTCACCTCGTCCAGACCTTCAAGTACTACAAGGAGCTGCACGGCAAGCACATCGAGGA

GGATCTGGGAAGCGAGGAGGCTCTGAGGGAGACCGTGCAGTGCCTGGCGACGCCGAGAGGTACTT  
CAGCCAGGTGATGGCGGGCGCTGAGGGAGGGCGCAGACCACCACGGGAAGGAGGCCCTGTCGCG  
GGTGGCGGTGACGCGGTCCGACGTGGACATGGACGGCATCAGGGCGGCTACCAGGAGCAGTTCGG  
GGCCAAGCTCGAGGACGCCGTCGCCGGCAGCGCGCACGGGCACTTCAAGGACGCGCTCGTCTCGCTC  
ATCGTCGGCAAGTAA

>TaAnn4-A

ATGACCACGATCACAGTTCCTCAAGTTGTCCCTTCTCCGGTTGAAGATGCTGAGGCGCTCATGAAGGC  
CTTCCAAGGATGGGGCACCGACGAGCAGGCAGTGATCTACATACTAGCTCACCGGGACGCGGCCAG  
AGGAAGCTGATCCGGCAGGCGTACGAAGAGAAGTACAACGAGCTCCTCACCGACCGGCTCCAGTCTG  
AACTTTCGGCGATCTTCAGACAGCGATGGGCTACTGGGTACTCGACCCACGGAGAGGCAGGCCGT  
GATCGCCAACGCCGCCACGAAGTGCATCGACGAGGAGTACCCCGTGATCGTGGAGATCGCGTGCGCC  
AACTCGCCCGCCGAGCTCCTGGAAGTGAAGCAGGCCTACCACGCCATCTACAAGCGCTCGCTGGAGG  
AAGACGTGCGCCGCTGGTGCCACGGGAAACCTCCGTAACCTCTTGGTCGCCCTGGTGAGCACCTACAG  
GTACGACGGCGACGAGGTGAACGGCGGGCTGGCGAGATCGGAGGCGAAGATCATTCAAGCGGACGT  
GAAGAACGGCGTACCGGCGACCACGGGGAGCTCATTAGGGTCCTGGGCACCAGGAGCAGAGCCCA  
GCTCGGCGCCACGTTCAACTGCTTCAGAGATGAGCACGGCACCCGTCACCAAGGTCTGAGGAAC  
GCGATGCACAAGTCGGGGACCGACGAGGAGAGCCTGCTCCGGGTGGTGGTGATGCACGCGGAGAAG  
GACCTCAGGGCCATCAAAGACGAGTTCCACAGGAGGGCGTCGGTTGCCTTGGAGCAAGCCATCGCCA  
AGGAAACCTCCGGTGACTTCAAGACCTTCATCATGGCTCTTGTGGGACTAGCCAATAA

>TaAnn4-D

ATGGCCACGATCAAAGTTCCTCAAGTTGTCCCTTCTCCGGTTGAAGATGCTGAGGCGCTCATGAAGGC  
CTTCCAAGGATGGGGCACTGACGAGCAGGCAGTGATCTACATACTAGCTCACCGGGACGCGGCGCAG  
AGGAAGCTGATCCGGCTGGCGTACGAAGAGAAATACGACGAGCGCCTCACCGACCGGCTCGAGTCAG  
AGCTCTCCGGCGATCTTCAGACGGCGATGGGCTACTGGGTACTCGACCCACGGAGAGGCAGGCCGT  
GATCGCCAACGCCGCCACGAAATGCATCGACGAGGAGTACCCCGTGATCGTGGAGATCGCCTGCGCC  
AACTCGCCCGCCGAGCTCCTGGAAGTGAAGCGGGCCTACCACGCCATCTACAAGCGCTCGCTGGAGG  
AAGACGTGCGCCGCTGGCGCCACGGGAAACCTCCGCAATCTCTTGGTCGCTCTGGTGAGCGCCTACAG  
GTACGACGGCGATGAGGTGAACGGCGGGCTAGCGAGGTTCGGAGGCGAAGATCATTCAAGCGGACGT  
GAAAAACGGCGTACGGCGGATCACGGGGAGCTCATCAGGGTCCTAGGCACCAGGAGCAGAGCCCA  
GCTCGGCGCCACGTTCAACTGCTTCAGAGATGAGCACGGCACCCGTCACCAAGGCCCTGCTGCAT  
GCCCCGACACGACGGGCTACGCGCGTGCCTGCGGACCGCGGCGAGGTGCATCGCCGACACAGAC  
AAGTACTTCGCAAGGTCTGAGGAACGCGATGCACAAGTCGGGGACCGACGAGGAGAGCCTGCTCC  
GGGTGGTGGTGATGCGCGCGGAGAAGGACCTCAGGGGCATCAAAGACGAGTTCCACAAGAGGGCGT  
CGGTTGCCCTGGAGCAAGCCATCGCCAAGGAAGCCTCCGGTGACTTCAAGACCTTCATCACGGCTCTT  
GTTGGGACT

>TaAnn5-B

ATGTCCGCCATCGTTCCTCCAGCCCCGTGCCGTCACCCCTCCGACGACGCCGAGGGCATCAGGAAGG  
CGCTCCAAGGATGGCGGGCGGACAAGGAGGCCCTGGTGCGCATACTGGCGGGGCGCTCCTCAACTC  
CTTCCGCCAGCGGCTCTCCCGCCAGTACTGCCCGTACCCGTCGACTTCTGGAAGGCGATCATCCTGT  
GGACGATGGACCCGGCGGAGCGGGACGCGAACCTGGTGCACGGCGCGCTGAGGCGGGCAGGGGACG  
GCGACCACCTCGCCGTGCTGGTGGAGGTCTCGTGCGGTCGACCCCGACCACCTCGTGGCCGTCCG  
GCGTGCTACCCTCCCTCTTCGGCTGCTCCGTCGAGGAGGACCTCGCGTCTGCGCCGCGCTCCAGC  
AGCCGCTCAGGAAGATGCTGGTGAGCCTCGTGAGCTCCTACCCTACGGCGGTGACCGCGTCGACGC  
GGACGTGGCGAAGCTGGAGGCGTCGACGCTCTCGGAGGCCGTCGGGAAGAAGCAGCCGACACGCA

CGAGGTGGTGCAGATCCTCGGCACCCGGAGCAAGCCCCAGCTCAGGGCCACGCTCCGGCGGTACAGG  
GAGGATCACGGCACGGACATCGTCGAGGACATCGACAGCCGCTGCAGCAGCCAGTTCCGCCAGGACGC  
TGAAGAGCGCAGTCTGGTGCCTGACCTCGCCGGAGAAGCACTTCGCGGAGATGATCAGGGAGTCGGT  
GGTGGGGCTGGGGACCTACGAGGACATGCTGACGAGGGTGGTCTGTGTCGCGGGCGGAGATCGACATG  
AAGCAGATCAAGGAGGAGTACAGGGCCAGGTTCAAGACCACCGTGACCTGCGACGTCGTCGACGAC  
ACCTCTTTTCGGCTACAAAGACATCCTGCTGGCCTTGGTTGGCTGCGAGGAAGAGTGA

>TaAnn6-A

ATGGCGAGCCTGAGCGTGCCTCCGGTGTACGTCCCCGCGCCATGACGCCATCGCCCTCCACAGGGC  
CTTCAAAGGTTTTGGGTGCGACAGCACGACGGTGATCAACATCCTGGCGCACCGCGACGCGGTGACG  
CGCGGGCTCATCATGCAGGAGTACAGGGCCATATAACCACCAGGACCTTACCATCGCCTATCGACCGA  
GCTCAGCGGGAACCACAAGAAGGCGATGCTGCTGTGGGTGCTGGACCCCGTGGGCCGCGACGCCAC  
GATACTGAACCAGTCCCTCAACGGCGACATCACCGACCTGCGCGCCGCCACGGAGGTCATCTGCTCCC  
GGACGCCGTCGACGCTGCAGATCATGAAGCAGACCTACCGCGCCCGCTTCGGCTGCTACCTCGAGCA  
GGACATCACCGAGCGCACCTACGGCGACCACCACAAGCTTCTGCTGGCGTACTTGGGGATCCCCGCGGT  
ACGAGGGCCCCGAGGTGGACCCGGCGGGCGGGCGCGGACGCGAGGGAGCTGTACCGCGCCGGCG  
AGAAGCGGCTCGGCACCGACGAGCGCGCCTTCATCCGCGTCTTCACCGAGCGCAGCTGGGCGCACCT  
CGCCGCCGTCGCCGGCGCCTACCACCACCTGTACGCGCGCTCCCTGGAGAAGGCCGTGAAGAGCGAG  
ACGTCGGGGACCTTCGAGTTCGGGGTGTGACGATCCTCCGGTGCGCCGAGAGCCCGGCGAGGTA  
TCGCCAAGGCGCTGCACAAGGCGATGAAGGGGCTGGGCACCAGCGACACGACGCTGATACGGGTGG  
TGGTCACCAGGGCGGAGGTGGACATGCAGTACATCAAGGCCGAGTACCACAAGAAGTACAAGCGCTC  
GCTCGCCGACGCCATCCACTCCGAGACCTCCGGCAACTACCGCACCTTCTCCTCTCCCTCGTCGGCC  
GCGACCGCTAA

>TaAnn6-B

ATGGCGAGCCTCAGCGTGCCTCCGGTGTACGTCCCCGCGCCACGACGCCATCGCACTCCACAGGG  
CCTTCAAAGGTTTTCGGGTGCACAGCACGACGGTGATCAACATCCTGGCGCACCGGGACGCGGTGCA  
GCGCGCGCTCATCATGCAGGAGTACCGGGCCATGTACCGGCAGGACCTTACCACCGGCTGTCCACCG  
AGCTCAGCGGGAACCACAAGAAGGCGATGCTGCTGTGGGTGCTGGACCCCGTGGGCCGCGACCGCA  
CGATACTGAACCAGTCCCTCAACGGCGACATCACCGACCTGCGAGCCGCCACGGAGGTGATCTGCTC  
CCGGACGCCGTCGACGCTGCAGATCATGAAGCAGGCTACCGCGCCCGCTTCGGCTGCTACCTCGAGC  
AGGACATCACCGAGCGCACCTACGGCGACCACCAGAAGCTTCTGCTGGCGTACTTGGGGATCCCGCG  
GTACGAGGGCCCCGAGGTGGACCCGGCGGGCGGGCGCGGACGCAAGGGAGCTGTACCGCGCCGG  
CGAGAGGCGGCTGGGCACCGACGAGCGCGCCTTCATCCGCGTCTTCACCGAGCGCAGCTGGGCGCAC  
CTCGCCGCCGTCGCCGGCGCCTACCACCACCTGTACGCGCGCTCTTTGGAAAAGGCCGTGAAGAGCG  
AGACGTCGGGGACTTTCGAGTTGGGGTGTGACGATCCTCCGGTGCGCCGAGAGCCCGGCGAGGTA  
CTTCGCCAAGGCGCTGCACAAGGCGATGAAGGGGCTGGGCACCAGCGACACGACGCTGATACGGGT  
GGTGGTCACCAGGGCGGAGGTGGACATGCAGTACATCAAGGCCGAGTACCACAAGAAGTACAAGCG  
CTCGCTCGCCGACGCCATCCACTCCGAGACCTCCGGCAACTACCGCACCTTCTCCTCTCCCTCGTCG  
GCCGCGACCGCTAA

>TaAnn7-B

ATGGCGACCATCGCCGTCCCGACGCCCTGCCGTCCCCGGCCCGGACGCGGAGAGCCTCAGGAATG  
CCGTGCAAGGCTGGGGCACGGACGAGAAGGCCCTGGTGGAGATCCTCGGCCGGCGAACCGCCGCGC  
AGCGCGCCGAGATCCGCCGGGCCTACGCCAGCCTCTACAAGGAGTCCCTCCTCACCCGCCTCCACGA  
CGAGCTCTCCGGCCACTTCCAGAAAGCGATGGTGTGCTGCTGGCGACGGACCCGGCGGAGAGGGACGC  
CAAGCTGGTGAGGGAGGCCCTGGGCAGGCGGGGCGACGACAGGGACGCGTGGGTGCTCATCGAGGC  
CGCATGCGCCGCCACGCCGGAACACCTCGTCGCCGTCCGCCGCGCCTACCGGTCCCTCCATGGATCCT



CCCTGGAGGAGGACGTCGCCGCCTGCTCCGCGTTCCAAGAACCCTCAGGAAGCTGCTGGTGAGCCT  
GGTGAGGTCGTACCGGTGCGCGGAGGAGAGCGTGGACATGGACGTGGCCAAGCTGGAGGCCGCGCA  
GCTGGCGGAGGCCGTCAGGAGGAAGAA

GCAGCCGCACGGCGGCGAGGTTCGTCGGATCGTGAGCACCAGGAGCAAGTCGCAACTCGCAGCCAC  
GTTCCGGTGCTACAAGGAACAACATGGCAGCGACATCGAAGAGGACATGAAGCAGTACAGCAGCAGC  
CAGTTTGCAAGGATGCTCAAGATTGCTGTCTGGTGCCTCACATCTCCTGAAAAGCACTATGCAGAGGT  
TATCAGGTACTCCATCTTAGGACTTGGAACGGACGAGGACACACTCACCAGGGCAATCGTGTCCAGGG  
CCGACATCGACATGGAGAAGATCAAGCAAGAGTACAGGGTCAGATTCAAGACGACCGTAACAGACGA  
CGTCGTCGGTGATACCTCGCGGTATTACATGGATATCTTGTGGCCTTGGTAGGGAAGGAGTGA

>TaAnn7-D

ATGGCGACCATCGACGTCCCGACGCCCCTGCCGTCCCCGGCCGCGACGCGGATAGCCTCAGGAATG  
CCGTGCAAGGCTGGGGCACGGACGAGAAGGCGCTGGTGGAGATCTCGGCCGCGCAACCGCCGCGC  
AGCGCGCCGAGATCCGCCGGCCTACGCGAGCCTCTACAAGGAGTCCCTCCTACCCGCCTCCACGG  
CGAGCTCTCCGGCCACTTCCAGAAAGCGATGGTGCTGCTGGCGACGGACCCGGCGGAGAGGGACGC  
CAAGCTGGCGAGGGAGGCCCTGGGCAGGCGGGGCGACGACAGGGACGCGTGGGTGCTCATCGAGGC  
CGCCTGCGCCGCGCGCCGACCACCTCGTCGCCGTCCGCCGCGGTACCGGTCCCTCCATGGATCCT  
CGCTGGAGGAGGACGTCGCCGCCTGCTCCGCGTTCCAAGAACCCTCAGGAAGCTGCTGGTGAGCCT  
GGTGAGGTCGTACCGGTGCGCGGAGGAGAGCGTGGACATGGACGTGGCGAAGCTGGAGGCCGCGCA  
GCTGGCGGAGGCCATCCGGAGGAAGAA

GCAGCCGCACGCCGGCGAGGTTCGTCGGATCGTGAGCACAAGGAGCAAGCCGCAGCTCGCCGCCAC  
GTTCCGGTGCTACAAGGAACAACATGGCAGCGACATCGAAGAGGACATGAAGCAGTACAGCAGCAGC  
CAGTTTGCAAGGATGCTCAAGATTGCTGTCTGGTGCCTCACATCTCCTGAAAAGCACTTCGCAGAGGT  
TATCAGGTACTCCATCTTAGGGCTTGGAACGGACGAGGACGCACTCACCAGGGCAATCGTGTCCAGGG  
CCGACATCGACATGAAAAGATCAAGCAAGAGTACAGGGTCAGATTCAAGACGACCGTAACAGACGA  
TGTCGTCGGCGATACCTCGGGTATTACATGGATATCTTGTGGCCTTAGTAGGGAAGGAGTGA

>TaAnn8-A

ATGCAGCAGTTTCTTGCAGCACAGCCGAGCAGTAACGGCAGCACTGCAGCAGCAGCAGCAGCAGCTC  
CACCGTCGTCGCCGTCGCCCTGCGTTCGAGGCCACCCAGGAGAGCAGCAGCAGCAGCAGCAGCAGCAT  
CGTCAAGGAGGCCACCATGGCCGACGAGCACCAGGAACTCACCAAGGCCTTCTCAGGGATGGGAGG  
TCTGGGCGTGGAGGAGACGGCGCTGGTGTTCGCGCTGGGGCGGTGGAGGAAGCAGCCGGAGAAGCG  
GGCGCAGTTCCGCAGGGGCTTCCCGGGCTTCTTCGCGCCGGCGGGCGGGGGGGGGGGGGGGGGGGC  
GATCGAGCGCTGCTCCGACGACTACGTGCGGCACCTCAAGACGGAGTTCGCCCGGTTCAAGACCCTC  
ATGGTGCTGTGGGCGATGCACCCGTGGGAGCGCGACGCGCGTGGGCGCACCCGCGGCTGCACAAGA  
AGCACCACCCGGTGGCCGTCCTCGTCGAGCTCGCCTGCACGCGCGCCGCCGACGAGCTCCTCGGGCG  
CCGCCGCGCTACCACGCGCTTACCA

CCGCTCCCTCGAGGAGGACGTCGCGTACCGCGTCAAGGACGCCGCGCAACCGCCTGCTGCTCGGG  
CTCATTACCGCCTACCGCTACGAGGGCCCGCGCTCGACGAGGAGCTCGCCAAGGAGGAGGCCGCGG  
CGCTCTCCGGCGCCGGAGCCAAGGCGGCCAGAGCGAGCTCGTGGTGCGGGTCTCGCCACCAGGA  
GCAAGCCGCAGCTCCGGGCGACCTTCAAGGCTGTACAGGGAGCTCCACGGCAAGCCGCTGGAGGAGG  
AGTTTCGGCGGCGAGGCGCCGTGCTGCGGGAGGCCGTGAGGTGCTCGAGTCGCCGGCCAGGTACTT  
CGGCGAGGTGATCGACGGGGCGTTCAAGGAGGGGGCGGACAAGCAGGCCAAGGCGGCGCTGACCCG  
CGTCGTCGTCGCCGTCGCAAGAACACCCACGGACATTACAGGGACGCGTCTCGCCATGA  
TCGGGAAGTGA

>TaAnn8-D

ATGCAGCAGTTTCTTGCAGCACAGCCGAGCAGTAACGGCAGCACTGCAGCAGCAGCAGCTCCACCGC  
CGTCGCCGTCGCCCTGCGTTTCGAGGCCACCCAGGAGACCAGCAGCAGCAGAGCATCAAGGAGG  
CGACCATGGCCGACGAGCACCAGGAGCTACCAAGGCCTTCTCAGGGATGGGCGGCCTGGGCGTGGA  
GGAGACGGCGTTGGTGTTCGGCGCTGGGGCGGTGGAGGAAGCAGCCGAGAAGCGGGCGCAGTTCGG  
GAGGGGCTTCCCGGGATTCTTCGAGCCGGCGGGCGGGGGCGATCGAGCGCTGCTCCGACGACTAC  
GTGCGCCACCTCAAGACGGAGTTTCGCCCCGTTCAAGACCCTCATGGTGCTGTGGGCGATGCACCCGT  
GGGAGCGCGACGCGCGCTGGGCGCACCGCGCGCTGCACAAGAAGCACCACCCGGCGTCCGTCTCG  
TCGAGCTCGCTGCACGCGCGCCGCCGACGAGCTCTCGGCGCCCGCCGCGCCTACCACGCGCTCTA  
CCACCGCTCCCTCGAGGAGGACGTGGCGTACCAGCTCAAGGACGCCGCCGCAACCCGCTGCTGCTC  
GGGCTCGTACCCGCTACCGCTACGAGGGCCCCGCGCTCGACGAGGAGCTCGCCAGGGAGGAGGCC  
GCGGCGTCTCTGCCGCCCAGGCGCCGGCGCCAAGGCCAGAGTCAGAGCGAGCTCGTGGTGGCGG  
GTGCTCGCCACCAGGAGCAAGCCGACGTCCGGGCGACCTTCCGGTTGTACAGAGAGCTCCACGGCA  
AGCCGCTGGAGGAGGAGTTTCGGCGCGACGCGCCGTGCCTGCGGGAGGCGGTGAGGTGCCTCGAGT  
CGCCGGCCAAGTACTTCGGCGAGGTGATCGACGGGGCGTTCAAGGAGGGGGCGGACAAGCAGGCCA  
AGGCCGCTTGACCCGCGTCTGCTGTCCCGTCCGACGCCGACATGGAGGAGATCAAGGAGGCCCTA  
CCTGAAACAGCACGGGGCCAAGCTCGTGGACGCCGTCGCCAAGAACACCCACGGACATTACAGGGA  
CGCGCTGCTCGCCATGATCGGAAAGTGA

>TaAnn9-B

ATGGCGAGCCTCACCTTGCCGCCGGCGCCCCGAACCCCGCCAGGACGCCATCGACCTCCACAAGG  
CCTTCAAAGGGTTTGGCTGTGATAGTACAACAGTTTCAAATATACTTGTCCACCGTGACTCAATGCAAC  
GTGGATACATTCAACAGGAATACAAAATATGTATTCTGAGGAACTTTCACGTCGTATATCGTCTGAAC  
TCAGTGGAACCACAAGAAAGCAATGTCGCTCTGGATTCTTGATCCTGCTGGACGTGATGCGACTGTT  
CTGAAAGAAGCTCTAAGTGCTGAAAGTCTTGATCTGAAAGCAGCTACTGATATAATATGTTCCAGGAC  
ACCATCACAGCTGCAAATAATGAAACAGACATATTATGCAAAGTTTGGTACTTATCTTGAGCATGACATT  
AGTCAGCAAGCATCCGGCGATCATCAGAAGATCTTACTAGCCTATGTTGGCATTCCACGCTACGAAGGC  
CCGGAGGTTGATCCCACTATAGTGACACATGATGCGAAGGACCTCTACAAAGCTGGTGAGAAAAAGC  
TGGGCACAGATGAGAAAACCTTCATCCGCATCTTACTGAACGCAGCTGGGCACACATGGCAGCTGTT  
GCTTCTGCTTACCATCACATGTATGATCGGTCTGTACAGAAGGTTGTGAAGAATGAAACATCTGGAAAC  
TTTGAAGTTGCTCTGTAACTATCCTCAGATGTGCTGAGAATCCAGCGAAGTATTTTGCTAAGGTGTTG  
AGGAAGTCCATGAAAGGTCTAGGTACTGATGACAAGACACTTGTAAGGTTGTGGTAACAAGGACTG  
AGATTGATATGCAGTATATCAAGGCAGAATATTACAAGAAATACAAAAAGCCTTTAGCTGATGCTATCCA  
TTCCGAAACATCAGGCGGTTATCGGACATTCTGCTTTCTCTTGTGGTAGCCATTAG

>TaAnn9-D

ATGGCGAGCCTCACCTTGCCGCCGGCGCCCCGAACCCCGCCAGGACGCCATCGACCTCCACAAGG  
CCTTCAAAGGGTTTGGCTGTGATAGTACAACAGTTTCAAATATACTTTCTCACCGTGACTCAATGCAAC  
GTGGATACATTCAACAGGAATACAAAATATGTATTCTGAGGAACTTTCACATCGTATATCGTCTGAACT  
CAGTGGAACCACAAGAAAGCACTGTCGCTCTGGATTCTTGATCCTGCTGGACGTGATGCGACTGTTT  
TGAAAGAAGCTCTAAGTGCTGAAAGTCTTGATCTGAAAGCAGCTACTGATATAATTTGTTCCAGGACA  
CCATCACAGCTGCAAATAATGAAACAGACATATTATGCAAAGTTTGGTACTTATCTTGAGCATGACATTA  
GTCAGCAAGCATCCGGCGATCATCAGAAGATCTTACTAGCCTATGTTGGCATTCCACGCTACGAAGGCC  
CGGAGGTTGATCCCACTATAGTGACACATGATGCGAAGGACCTCTACAAAGCTGGTGAGAAAAAGCT  
GGGCACAGATGAGAAAACCTTCATCCGCATCTTACTGAGCGCAGCTGGGCACACATGGCAGCTGTT  
GCTTCTGCTTACCCTCACATGTATGATCGGTCTGTACAGAAGGTTGTGAAGAATGAAACATCTGGAAA  
CTTTGAAGTTGCTCTGTAACTATCCTCAGATGTGCTGAGAATCCAGCGAAGTATTTTGCTAAGGTGTT  
GAGGAAGTCCATGAAAGGTCTAGGTACTGATGACAAGACACTTGTAAGGTTGTGGTAACAAGGACT

GAGATTGATATGCAGTATATCAAGGCAGAATATTACAAGAAATACAAAAAGCCGTTGGCTGATGCTATC  
CATTCCGAAACATCAGGCGGTTATCGGACGTTCTGCTTTCTTGTGGTAGCCATTAG

>TaAnn10-A

ATGGCTGCCCGTTCTCTGCGCCGCAGGGTTCGAGAACGAGTGCAGAGAGATCCACGGAGCATGCG  
ACGAGCCGCGCCGCCTGAGCCGCCTCCTGGCTCACCGGAGCGCGTCGGAGAGGCAGCAGATCAAGG  
CGACGTACCGCGCAATGTTGCGCGAGGACCTCGCCGGCAGGCTCCATAAAACCCTCACGGCCAATCA  
GGACAACGAGCTCTGCAACCTGCTCTACCTGTGGATGCTTGACCTGGCGGAGCGAGACGCGATCATG  
GCGAGGGACGCCATCGAGAGCGGCGCGGCGCCGATTACCGCGCCCTGTGCGAGGTCTTCACGCGGC  
GGAAGCAGGACCAGCTCTTCTTACCAAGCAGGCGTACCTGGCCAGGTTCAAGAAGAACCTGGAGCA  
GGACATGGTCACCGACCCCTCGCACCCCTTATCAGAGACTATTGGTAGCTCTGGCAACCTCCCACAAGT  
CGCACCACGATGAACCCAGCCAGCACATCGCGAAATGCGACGCCAGGCGATTGTACGACGCCAAGAA  
CGGCGGCGGCACGGGATCGGTGACGAGGCCGCCATCCTCGAGATGTTAGCAAGAGGAGCATCCCA  
CAGCTCAGGCTGGCGCTCTGCAGTTACAAGCACATATATGGGCATGACTTCACCAAAGCACTGAAGAA  
GAATTTGGCTCGTGATTTTGAAGAGTCTCTGAGAGTTGTTGTCAGTGCATCTACACTCCTTCCAAGTA  
TTACTGCAAGTTACTGCAGAGAAGCATGCAACGCCAGAAAGCCGATAAAAGGTTGGTTACGAGGGCT  
ATCTTGGGCAGCGACGACGTCGGCATAAACGAGATCAAGTTGGCGTTAAGAGTAACTTCGAAAGA  
ACCTTGCAGATTTTCATCCATGAAAGCTTACCACAGAGTGATTACAGAGAGTTTCTTTGGTTATGGCAAG  
GGGGCCAGTGCCTAGTAGCATCATAA

>TaAnn10-B

ATGGCTCTCTCTCCCTCTCTCCCTTATGCATCTCTGCACTGGTTCACACATCGAAAGCCTCAGCACGGC  
GCTGAAGTGCCGAGCATGGCCGCCCCGTTCTCTGCGCCACAGGGTTCGAAAACGAGTGCAGAGAGA  
TCCATGGCGCCTGCGACGAGCCGCGCCGCTGAGCCGCCTCCTGGCTCGCCGGAGCACATCGGAGAG  
GCAGCAGATCAAGGCGACGTACCGCGCAATGTTGCGCGAGGACCTCGCCGGCAGGCTCCATAAAACC  
CTCACGGCCAATCAGGACAACGAGTCTCAGCATGGCCTCCCTCTCCAGCTCTGCAATCTGCTCTACCT  
GTGGATGCTTGACCTGGCGGAGCGAGACGCGATCATGGCGAGGGACGCCATCGAGAGCGGCGCGGCG  
GCCGATTACCGCGCCCTGTGCGAGGTCTTACGCGGCGGAAGCAGGACCAGCTCTTTTTCACCAAGCA  
GGCGTACCTGGCCAGGTTCAAGAAGAACCTGGAGCAGGACATGGTCACCGACCCCTCGCACCCCTTAT  
CAGAGACTATTGATAGCTCTGGCAACCTCCCACAAGTTCGCACCACGATGAACCCAGCCAGCACATCGC  
GAAATGCGACGCCAGGCGATTGTACGACGCCAAGAACGGCGGCGGCACGGGATCGGTGACGAGGC  
CGCCGTCCTCGAGATGTTAGCAAGAGGAGCATCCACAGCTCAGGCTGGCGCTCTGCAGTTACAAG  
CACATATATGGGCATGACTTACCAAAGCACTGAAGAAGAATTTGGCTCGTGATTTTGAAGAGTCTCT  
GAGAGTTGTTGTCAGTGCATCTACACTCCTTCCAAGTATTACTGCAAGTTACTGCAGAGAAGCATGC  
AACGCCAGAAAGCCGATAAAAGGTTGGTTACGAGGGCTATCTTGGGCAGCGGCGACGTCGGCATAAA  
CGAGATCAAGTTGGCGTTTAAAGAGTAACTTCGAAAGAACCTTGCAGATTTTCATCCATGAAAGCTTAC  
CACAGAGTGATTACAGAGAGTTTCTTTGGTTATGGCAAGGGGGCCAGTGCCCAGTAGCATCATAA

>TaAnn10-D

ATGGCTGCCCGTTCTCTGCGCCGCAGGGTTCGAGAACGAGTGCAGAGAGATCCACGGAGCATGCG  
ACGAGCCGCGCCGCCTGAGCCGCCTCCTGGCTCACCGGAGCGCGTCGGAGAGGCAGCAGATCAAGG  
CGACGTACCGCGCAATGTTGCGCGAGGACCTCGCCGGCAGGCTCCATAAAACCCTCACGGCCAATCA  
GGACAACGAGTCTCAGCATGGCCTCCCTCTCCAGCTCTGCAACCTGCTCTACCTGTGGATGCTTGACC  
TGGCGGAGCGAGACGCGATCATGGCAAGGGACGCCATCGAGAGCGGCGCGGCGGCCGATTACCGCGC  
CCTGTGCGAGGTCTTACGCGGCGGAAGCAGGACCAGCTCTTCTTACCAAGCAGGCGTACCTGGCC  
AGGTTCAAGAAGAACCTGGAGCAGGACATGGTCACCGACCCCTCGCACCCCTTATCAGAGACTATTGGT  
AGCTCTGGCAACCTCCCACAAGTTCGCACCACGATGAACCCAGCCGGCACATCGCGAAATGCGACGCC  
AGGCGATTGTACGACGCCAAGAACGGCGGCGGCACGGGATCGGTGACGAGGCCGCCATCCTCGAGA

TGTTTCAGCAAGAGGAGCATCCCACAGCTCAGGCTGGCGCTCTGCAGCTACAAGCACATATATGGGCAT  
GACTTACCAAAGCACTGAAGAAGAATTTGGCTGGCGATTTTGAAGAGTCTCTGAGAGTTGTTGTCA  
AGTGCATCTACACTCCTTCCAAGTATTACTGTAAGTTACTGCAGAGGAGTATGCAACGCCCAGAAGCT  
GATAAAAGGTTGGTTACGAGGGCTATCTTGGGCAGCGACGACGTCGGCATAAACGAGATCAAGTTGGC  
GTTCAAGAGTAACTTTGGAAAGAACCTCGCAGATTTTCATCCATGAAAGCTTACCACAGAGTGATTACA  
GAGAGTTTCTTTGGTTATGGCAAGGGGGCCAGTGCCTAGTAGCATCATAA

>TaAnn11-A

ATGGCGACGCTCTCCGTCCCCGCCGCGTCCCCGGCCGTCGCCGAGGACTGCGAGCAGCTGCGCAAGG  
CGTTTCGCGGGGTGGGGACCAATGAGCGCCTCATCGTCTCCATCCTGGCGCACCCGCGACGCCGCGCA  
GCGCCGCGCCATCCGCCGCGCCTACGCCGAGGCCTACGGCGAGGAGCTGCTCCGCGCCATCGGCGAC  
GAGATCCACGGCAAGTTCGAGAGGGCGGTGATCCAGTGGACGCTGGACCCGGCGGAGCGGGACGCG  
GAGCTGGCCAACGAGGAGGCCAAGAAGTGGCAGCCGGGGGGCCGCGCGCTCGTCGAGATCGCCTGC  
GCGCGCACCCCGCGCAGCTCTTCGCCGCCAAGCAGGCCTACCACGACCGCTTCAAGCGCTCGCTCG  
AGGAGGACGTCGCCGCGCACGTCACCCGGCGACTTCCGCAAGCTTTTGGTGCCTCTTGTAAGCGCATA  
CGCTACGATGGCCCGGAGGTGAACACATCGTTGGCACACTCTGAAGCCAAATTAACAACGGAAAGA  
TCAACGAGAAGGCCTACAGCGATGATGAGGTCGTCAGGATTCTCACCAAGGAGCAAGGCTCAGCT  
ACTTGCAACATTCAACAGCTACAATGATCAGTTCAGTCACCCCATCACCAAGGACCTCAAGGAAGACC  
CAAAGAACGAGTTCCTGTCAACCCTCAGGGCGATCATAAGGTGTTTCACCTGTCCTGACAGATACTTT  
GAGAAGTTCGTCGGTTGGCCCTTGGAGGCGTCGGCACAGACGAGGACACCCTTACGAGGGTCATAA  
CCACTCGCGCTGAGGTGGACCTGAAGGTGATAAAGGAGGCGTACCAGAAGAGGAACAGCGTCCCGC  
TGGAGAAGGCTGTTTCCAAGGAAACAAGCAGAGACTATGAAGATATGATGCTTGCCTTCTGGGGGC  
AGAGTACTGA

>TaAnn11-B

ATGGCGACGCTCTCCGTCCCCGCCGCGTCCCCGGCCGTCGCCGAGGACTGCGAGCAGCTGCGCAAGG  
CGTTTCGCGGGGTGGGGACCAACGAGCGCCTCATCGTCTCCATCCTGGCGCACCCGCGACGCCGCGCA  
GCGCCGCGCCATCCGCCGCGCCTACGCCGAGGCCTACGGCGAGGAGCTGCTCCGCGCCATCGGCGAC  
GAGATCCACGGCAAGTTCGAGAGGGCGGTGGCCAGTGGACGCTGGACCCGGCGGAGCGGGACGCA  
GAGCTGGCCGGCGAGGAGGCCAAGAAGTGGCAGCCGGGGGGCCGCGCGCTCGTGGAGATCGCCTGC  
GCGCGCACCCCGCGCAGCTCTTCGCCGCCAGGCAGGCCTACCACGACCGCTTCAAGCGCTCGCTCG  
AGGAGGACGTCGCCGCGCACGTCACCCGGCGAATTCCGCAAGCTTTTGGTGCCTCTTGTAAGCGCATA  
CGCTACGATGGCCCGGAGGTGAACACATCGTTGGCACACTCTGAAGCCAAATACTCAATGGAAAGAT  
CAACGAGAAGGCCTACAGTATGATGATGATCAGGATTCTACTACAAGGAGCAAAGCTCAGCTAC  
TTGCAACATTCAACAGCTACAATGATCAGTTCAGTCACCCCATCACTAAGGACCTCAAGGAAGACCCC  
AAGAACGAGTTCCTCTCAACCCTGAGGGCGATCATAAGGTGTTTCACTTGCCCTGACAGATACTTTGA  
GAAGATCATCCGGTTGGCCCTTGGAGGCGTCGGCACAGACGAGAACACCCTTACGAGGGTCATAACC  
ACTCGCGCCGAGGTGGACCTGAAGGTGATAAAGGAGGCGTACCAGAAGAGGAACAGCGTCCCGCTG  
GACAAGGCTGTTTCTAAGGAAACAAGCAGAGACTACGAGGACATGATGCTTGCCTTCTGGGGGCAG  
AGTACTGA

>TaAnn11-D

ATGGCGACGCTCTCCGTCCCCGCCGCGTCCCCGGCCGTCGCCGAGGACTGCGAGCAGCTGCGCAAGG  
CGTTTCGCGGGGTGGGGACCAACGAGCGCCTCATCGTCTCCATCCTGGCGCACCCGCGACGCCGCGCA  
GCGCCGCGCCATCCGCCGCGCCTACGCCGAGGCCTACGGCGAGGAGCTGCTCCGCGCCATCGGCGAC  
GAGATCCACGGCAAGTTCGAGAGGGCGGTGACCCAGTGGACGCTGGACCCGGCGGAGCGGGACGCG  
GAGCTGGCCGGCGAGGAGGCCAAGAAGTGGCAGCCGGGGGGCCGCGCGCTCGTCGAGATCGCCTGC  
GCGCGCACCCCGCGCAGCTCTTCGCCGCCAAGCAGGCCTACCACGACCGCTTCAAGCGCTCGCTCG

AGGAGGACGTCGCCGCGCACGTACCCGGCGACTTCCGCAAGCTTCTGGTGCCTCTTGTAAGCGCATA  
CGCTACGATGGTCCGGAGGTGAACACATCGTTGGCACACTCTGAAGCCAAAATACTCAATGGAAAGAT  
CAACGAGAAGGCCTACAGTGATGATGAGATCGTCAGGATTCTACTACAAGGAGCAAGGCTCAGCTA  
CTTGCAACATTCAACAGCTACAATGATCAGTTCAGTCATCCCATCACTAAGGACCTCAAGGAAGACCC  
AAAGAACGAGTTCCTCTCAACCCTGAGGGCGATCATAAGGTGTTTCACTTGCCCTGACAGATACTTTG  
AGAAGGTCGTCCGGTTGGCCCTTGGAGGCGTCGGCACAGACGAGAACACCCCTTACGAGGGTCATAAC  
CACTCGCGCCGAGGTGGACCTGAAGGTGATAAAGGAGGCGTACCAGAAGAGGAACAGCGTCCCGCT  
GGAGAAGGCTGTTTCCAAGGAAACAAGCAGAGACTATGAAGATATGATGCTCGCACTTCTGGGGGCA  
GAGTATTGA

>TaAnn12-A

ATGGCGACGCTCAAGGTCCCCTCCAACGTCCCGGCCCTCGCCGACGACTGCGACAACCTCCGCAAGG  
CCTTCCAAGGGTGGGGCACGAACGAGGCGCTCATCATCTCCATCCTCGGCCACCCGCGACGCGTCGCA  
GCGCCGCGCCATCCGCAAGCACTACGCCGACACCTACGGCGAGGAGCTGCTCCGGAGCATCACCGAC  
GAGATCTCCGGCGACTTCGAGAGGGCCGTGATCCTGTGGACGCTGGACCCGGCGGAGCGGGACGCGG  
TGCTCGCCAACGAGACCGCCAGGAAGTGGCACCCCGGGAACCCCGTGCTGGTTCGAGATCGCCTGCGC  
GCGCGGCTCCAAGCAGCTCTTCGCCGTCAGGCAGGCCTACCATGACCGCTTCAAGCGCTCGCTCGAG  
GAGGACGTGCTTCCCACGTCACCGGCGACTTCCGCAAGCTGTTGGTGCCACTTGTAAGTCCACACC  
GCTACGAGGGACCAGAGGTCAACACAAGGTTGGCTCATTCAGAAGCCAAATTACTACACGAGAAGAT  
TGAGCATAAGGCTTATGCTGATGATGAGGTCATCAGAATTCTACCACCAGGAGCAAAGCTCAGCTGC  
TTGCAACATTCAATAATTACAATGATACATTTGGTCACCCGATCACTAAGGATCTGAAGGCTGACCCCA  
AGGATGAGTTCCCTCAAGACCCTGCGGGCGGTATCCGGTGCTTACCTGCCCTGATAGGTACTTTGAG  
AAGGTGGCCAGGGTGGCCATTGCAGGGAATGGAACCGATGAGAACTCCCTCACTAGGGTCATACCA  
CCCGCGCCGAGGTGGACCTGAAGCTGATCAAAGAGGCGTACCAGAAGAGGAACAGTGTCCCCTGG  
AGAAGGCCGTGCGAGGCGACACCTCCGGCGACTACGAGAGCATGCTCCTTGCCCTCCTGGGGAAGGA  
GTGA

>TaAnn12-D

ATGGCGACGCTCAAGGTCCCCTCCAACGTCCCGGCCCTCGCCGACGACTGCGACAACCTCCGCAAGG  
CCTTCCAAGGGTGGGGCACGAACGAGGCGCTCATCATCTCCATCCTGGGCCACCCGCGACGCGCGCA  
GCGCCGCGCCATCCGCAAGCACTACGCCGACACCTACGGCGAGGAGCTGCTCCGGAGCATCACCGAC  
GAGATCTCCGGCGACTTCGAGAGGGCCGTGATCCTGTGGACGCTGGACCCGGCGGAGCGGGACGCGG  
TGCTCGCCAACGAGACCGCCAAGAAGTGGCACCCCGGGAACCCCGTGCTGGTTCGAGATCGCCTGCGC  
GCGCGGCTCCAAGCAGCTCTTCGCTGCCAGGCAGGCCTACCATGACCGCTTCAAGCGCTCGCTCGAG  
GAGGACGTGCTGACACGTCACCGGCGACTTCCGCAAGCTGTTGGTGCCACTTGTAAGTCCACACC  
GCTATGAGGGACCAGAGGTCAACACAAGGTTGGCTCATTCAGAGGCCAAATTACTGCATGAGAAGATT  
GAGCATAAGGCTTATGGTGATGATGAGGTCATCAGAATTCTCACCCTAGGAGCAAAGCTCAGCTGCT  
TGCAACATTCAATAATTACAATGATACATTTGGTCACCCAATCACTAAGGATCTGAAGGCTGACCCCAA  
GGATGAGTTCCCTCAAGACCCTGCGGGCTGTTATCCGGTGCTTACCTGCCCTGATAGGTACTTTGAGA  
AGGTGGCCAGGCTGGCCATTGCAGGGAATGGAACAGATGAGAACTCCCTCACTAGGGTCATACCAC  
CCGTGCCGAGGTGGACCTGAAGCTGATCAAAGAGGCGTACCAGAAGAGGAACAGTGTCCCCTGGA  
GAAGGCCGTGCGAGGCGACACTTCCGGCGACTATGAGAGCATGCTCCTTGCCCTCCTGGGGAAGGAG  
TAG

(2). barely (*H.vulgare*)

>HvAnn1 MLOC\_15770.2

MASLSVPPVLTTPREDIALHKAFKGLGCDTMMVINILAHRDTAQRVLIQVEYKAIYHEDLYHRLATELSG

NHKNAMLLWVLDPVGRDATILNQALNGDITDLRAATEVICSRTPSQLQIMKQTYRARFGCYLEHDITERT  
YGDHQKLLLAYLGVPRNEGPEVDPSVVTDDARELYRTGEKRVGTDERAFIRIFERSWAHLASVAKAYQH  
MYARSLEKAVKSETAGNFQFGLLTILRCADTPAKYFAKVLHKAMKGLGTSNAALIRVVVTRTEVDMKYIK  
VEYHNKYKGLAEAIHSETSGNYRTFLLSLVGQDR

>HvAnn2 MLOC\_54933.3

MCGWCCCLDLECIHNIPPLSLLFLHFSSAPSTGREGIAERAPSMASISVPDPVPSPTEDAENIRKAVQGWGT  
DENALIEILGHRATAAQRAEIAVAYEGLNDKTLRLTQDELSGHFKGAMTLWAMDPVARDAKLAYKALRKK  
GGDRHAWVLIEVACASSPDHLVAVRKAYCSAYDSSLEEDVAACSLYKEPLKQFLVRLVSSYRYAGDLVDGE  
LARAEEAELHGAVAAKKQPLHGDVVRIVSSRSKPQLKATFEHYKRQHGKPIHEVLEGNRNDQLSAMLKT  
AVWCLTSPEKHFAEVIRTSIIGLGTDEESLTRAIVSRAEVDMMKKVKEEYKVRYKTTVTKDVVGDTSGYQ  
GILLTLIGPE

>HvAnn3 MLOC\_54932.1

MADEVQALTKAFSGLGGLGVDERTMVAALANWRKQPEKRSGRKSFPGLFKEHGGVMERCEDEYMLHL  
AAEFSRFKNLMVLWAMHPWERDARLAHHVLHQAHPSAIVVEIACTRSABELLGARKAYMALFHSLEED  
VAYRAKDKPYCSLLVGLVSAYRYEGPKVSDDTAKAEAKALGAAVKSADGGKLVENDEVVRILTTRSKPHL  
VQTFKYKELHGKHIEEDLGSEEALREAVQCLATPERYFSQVMAAALREGADHHGKEALSRVAVTRSDV  
DMDGIRAAAYQEFGAKLEDAVAGSAHGFKDALVSLIVGK

>HvAnn5 MLOC\_15543.3

MSAIAVSPVPSPSDDAEGIRKALQGWRADKEALVRILARRTAAQRSAIRRAYAFLFREPLLSFRQLSRQ  
YCPVTVDLFWKAIILWTMDPAERDANLVHGALRRRGDGDHLAVLVEVSCASDPDHLVAVRRAYRSLFGCS  
VEEDLASCALQPLRKMVSLVSSYRYGGDRVDADVAKLEASQLSEAVRKKQPHHDEVVRILSTRSKPQ  
LRATFRRYREDHGTDIVDDIDSRCSQFARTLKS AVWCLTSPEKHFAEMIRESV VGLGTYEDMLTRVVVSR  
AEVDMEQIKEEYRARFKTTVTCDVVDDTSFGYKDILLALVGCEEE

>HvAnn6 MLOC\_55134.1

MRTAASPSIGDPPTGKPGFSRFTLNPIVPVRTQHLHCTTSGSHRHRQPTHVRLLRSMASLSVPPVLTSRPH  
DAIALHRAFKGFCDSTTVINILHRDATQRALIMQEYRAIYHQDLYHRLSTELSGNHKKAMLLWVLDPV  
GRDAAILNQSLNGDITDLRAATEVICSRTPSQLHIMRQAYRARFGCYLEHDVAERTYGDHQKLLLAYLGV  
RYEGPEVDPAAAARDARDLYRAGEKRLGTDERAFIRVFTERSWAHLAAVAGAYRHLIYARSLDKAVKSETS  
GTFELGLLTILRCAESPARHFAKVLHKAMKGLGTSDTALIRVVVTRAEVDMMQYIKAEYHKKYKRSADAI  
HSETSGNYRTFLLSLVGRDR

>HvAnn7 MLOC\_3056.1

MLPPTKKTQLFLPPLPPSTESSSSSVRASESREQSAGEMATIAVPTPVPSAADAETLRNAVQGWGTDEKA  
LVEILGRRTAAQRAEIRRAYASLYKESLLARLHGELSGHFQKAMVLLATEPAERDAKLAREALGRRRGDD  
RDAWMLIETSCAAAPDHLVAVRRAYRSLHGSSLEEDVAACPAFQEPLRKLVSLSVRSYRCGEESVDMMDVA  
RLEAAQLAEAIRRKKQPHGGEVVRIVSTRSKPQLAATLRICYKEQHGSIDIEDMKQYSSSQFARMLKIAVW  
CLTSPEKHFAEVIRYSILGLGTDEDALTRAIVSRADIDMKMIKQEYRVRFKTTVTDDVVGDTSGYMEILL  
ALVGKE

>HvAnn8 AK370408

MQQFLAAQASSNGSTAAAAAAPPASASPLRSRPPRREQPSQTTVKDKEATMADEHQELTKAFSGMGGLG  
VEETALVSALGRWRKQPEKRAQFRRGFPFFTPAAAAGAGAIERCSDDYVSHLKTAFARFKSLMVLWAM  
HPWERDARWAHRALHKKHHPASVLEVELACTRTADELLGARRAYHALYHRSLEEDVAYRVKDADANRL  
VGLVSAYRYEGPRVDEGLAREEAAALAGAKAQSELVARVLATRSPQLRATFRLYRELHGKPLEEEFGGE  
APCLREAVRCLESPARYFGEVIDGAFKEGADKQAKAALTRVVVSRSDADMEEIKDAYLKHGAKLVDAV  
AKNTHGHYRDALLAMIGK

>HvAnn9 AK249691

MASLTLPPAPPNPRQDAIDLQKAFKGFCDSTTVSNILAHRDSMQRGYIQQEYKTMYSSELSRRISSELSG  
NHKKAMSLWILDPAGRDATVLKEALSAESLDLKAATDIICSRTPSQLQIMKQTYAKFGTYLEHDISQOTS  
GDHQKILLAYVGIPRYEGPEVDPTIVTHDAKDLYKAGEKKLGTDEKTFIRIFTERS WAHMAAVASAYQHM  
YDRSLQKVVKSETSGNFEVALITILRCAENPAKYFAKVLKSKMKGLGTDDKTLVRVVVTRTEIDMQYIKAE  
YYKKYKKPLADAIHSETSGGYRTFLLSLVGS

>HvAnn10 MLOC\_54650.4

MASRSPATAGFESECREIHGACDEPRRLIRYLAHRSAPERQQIKATYRTMFGEDPVGRLHKTLANQDNEL  
CNLLYLWMLDLAERDAIMARDAIESGAAADYRALVEIFTRRKQDQLFFTKQAYLARFKKNLEQDMVTD  
SHPYQRLVALATSHKSHHDEPSRHIKCDARRLYDAKNGATGSVDEAAILEMFSKRSIPQLRLALCSYKH  
IYGHDFTKALKKNSAGDFVESLKVVVKCIHSPSNYYCKLLQRSMQRPETNKRLVARAILGSDDVGVNEIK  
LAFKSNFGKNLEDFIHESLPQSDYRDFLWIWQGGQCPVAS

>HvAnn11 MLOC\_51591.2

MATLSVPAAVPAVAEDCEQLRKAFAGWGTNERLIISILAHRDAAQRRRAIRKHYADAYGEELLRSITDEIHGK  
FERAVIQWTLDPAERDAVLANEEAKKWNPGGRALVEIACARTPAHLFAAKQAYHDFKRSLEEDVAAHVT  
GDFRKLPLVLSAYRYDGPEVNTSLAHSEAKILHAKISEKAYSDDDEVVRLTTRSKAQLLATFNSYNDQFSH  
PITKDLKEDPKDEFSLTRAIIRCFCTCPDRYFEKIVIRLALGGVGTDEHTLTRVITRAEVDLKVIKEAYQKRN  
SVPLEKAVSKDTTRDYEDMMLALLGAEY

>HvAnn12 AK248515

MATLKVPSNPALADDCDNLKAFQGWGTNEALIISILGHRDAAQRRRAIRKHYADTYGEELLRSITDEISG  
DFERAVILWTLDPAERDAVLANETAKKWHPGNPVLVEIACSRGSAQLFAVRQAYHDFKRSLEEDVAAHV  
TGDFRKLPLVSSYRYEGPEVNTRLAHSEAKILHEKIEHKAYGDDEIIRILTTRSKAQLLATLNNYNDFTG  
HPITKDLKADPKDEFKTLRAVIRCFCTCPDRYFEKVARLAIAGNGTDENSLTRVITRAEVDLKLIIKAYQK  
RNSVPLEKAVAGDTSGDYETMLLALLGKEN

>HvAnn1 MLOC\_15770.2

ATGGCGAGCCTGAGCGTGCCTCCGGTGCTCACGCCTCCGCGGAGGACGCCATCGCTCTCCACAAGG  
CCTTCAAAGGGCTCGGTTGCGACACCACGATGGTGATCAACATACTTGCTCACCGCGACACGGCGCA  
GCGCGTGCTCATCCAGCAGGAGTATAAAGCCATATACCATGAGGATCTCTACCATCGCCTAGCAACTGA  
GCTGAGTGAAACCACAAGAATGCTATGCTGCTTTGGGTCTCGACCCCGTGGGGCGTGACGCCACCA  
TATTGAACCAAGCTCTCAATGGCGACATCACCGACCTGAGAGCCGCCACCGAGGTAATCTGCTCCAGG  
ACGCCGTCGCAGCTGCAGATCATGAAGCAAACCTACCGCGGAGGTTGCTTACCTCGAGCATGA  
CATCACCGAACGCACCTATGGTGATCATCAGAAGCTTTTGTGCTTACCTGGAGTCCCGCGAAACG  
AAGGCCCGAAGTAGACCCTTCGGTGGTGACAGACGACGCGAGGGAGCTGTATCGAACCGGCGAGA  
AGAGGGTGGGCACCGATGAGCGGGCTTCATCCGCATCTTCAGCGAACGCAGCTGGGCGCACCTGGC  
GTCCGTTGCCAAAGCTTACCAGCACATGTACGCCCGTCCCTGGAGAAGGCAGTGAAGAGTGAGACA  
GCAGGGAACCTCCAGTTCGGGCTGCTGACCATCTCAGGTGCGCCGACACTCCGGCGAAGTACTTTGC  
CAAGGTCCTGCACAAGGCGATGAAAGGCTGGGCACCAGCAACGCGGCACTCATACGGGTGGTGGTG  
ACGAGGACCGAGGTCGACATGAAGTACATCAAAGTAGAGTACCACAACAAGTACAAGGGGTGCTGG  
CCGAAGCTATACACTCAGAGACGTCAGGGAACTACAGAACCCTTCTCTCTCGCTCGTCCGGCCAGGAC  
CGC

>HvAnn2 MLOC\_54933.3

ATGTGTGGCTGGTGCTGCTGCCTCGACCTCGAGTGCATCCATAACATCCCGCCCCCTCAGTCTCCTCTTC  
CTCCACTTCTCCTCGGCTCCATCAACGGGAAGGGAGGGGATAGCAGAACGTGCTCCCTCCATGGCCTC  
CATCTCGGTCCCGGACCCCGTCCCTTCCCGACCGAGGACGCAGAGAACATAAGAAAGGGCGGTACAA  
GGGTGGGGGACGGACGAGAATGCGCTGATCGAGATCCTAGGCCACCGGACGGCGGCGCAGCGCGCG  
GAGATCGCCGTGGCTACGAGGGCCTCAACGACAAGACCCTCCTCCGCACGCTCCAAGACGAGCTCT

CCGGCCACTTCAAGGGCGCCATGACGCTGTGGGCGATGGACCCGGTGGCGCGGGACGCCAAGCTGGC  
CTACAAGGCCCTGAGGAAGAAGGGCGGGACCGGCACGCCTGGGTGCTCATCGAGGTGGCCTGCGC  
GTCGTGCGCCGACCACCTCGTCGCCGTCAGGAAGGCCTACTGCTCCGCCTACGACTCGTCCCTCGAGG  
AGGACGTGCGCCGCTGCTCGCTCTACAAGGAACCCCTCAAGCAGTTCCTGGTGGCGTTGGTGAGCTC  
GTACCGCTACGCCGGCGACCTCGTCGACGGCGAGCTGGCGAGGGCGGAGGGCGCCGAGCTGCACGG  
CGCGGTGGCGGCCAAGAAGCAGCCGCTGCACGGGGACGTGGTGCGCATCGTCAGCTCCAGGAGCAA  
GCCGCAGCTCAAGGCCACGTTTCGAGCACTACAAGCGACAGCACGGCAAGCCATCCACGAGGTTCTC  
GAGGGGAACCGGAATGACCAGCTCTCGGCCATGCTGAAAACCTGCGGTTTGGTGCTTGACATCGCCGG  
AGAAACATTTTCGAGAGGTGATCCGGACCTCGATCATAGGGCTCGGCACCGACGAGGAGTGCCTGAC  
CAGAGCCATCGTCTCGCGCGGGAGGTGCACATGAAGAAAGTCAAGGAGGAATACAAGGTGAGGTAC  
AAGACGACGGTGACCAAGGACGTCGTCGGCGACACTTCCGGGTACTACCAGGGCATCCTGCTCACCC  
TCATCGGGCCAGAG

>HvAnn3 MLOC\_54932.1

ATGGCTGACGAAGTTCAGGCGCTACCAAGGCCTTCTCAGGTCTGGGGGGTCTGGGCGTGGACGAGC  
GGACGATGGTGGCGGCGCTGGCGAACTGGCGGAAGCAGCCGGAGAAGCGGTGGGGTTCCGGAAGA  
GCTTCCCAGGGCTGTTCAAGGAGCACGGCGCGTGTATGGAGCGGTGCGAGGACGAGTACATGCTGCA  
CCTGGCCGCGAGTTCTCCCGTTCAAGAACCTGATGGTGCTGTGGGCGATGCACCCGTGGGAGCGC  
GACGCCCGCTCGCGCACACGTCCTCCACCAGGCCACCCCTCCGCCATCGTCGTGGAGATCGCCTG  
CACCCGCTCCGCCGAGGAGCTCCTCGGCGCGCAAGGCCTACATGGCGCTCTTCCACCCTCCCTCG  
AGGAGGACGTGCGCTACCGCGCCAAGGACAAGCCCTACTGCAGCCTGCTGGTGGGGCTGGTGAGCGC  
GTACCGGTACGAAGGGCCCAAGGTGAGCGACGACACGGCCAAGGCGGAGGCCAAGGCGCTGGGAGC  
GGCGGTGAAGAGCGCCGACGGCGGAAGCTGGTGGAGAACGACGAGGTGGTAAGGATCCTCACAC  
CAGGAGCAAGCCTCACCTCGTCCAGACCTTCAAGTACTACAAGGAGCTGCACGGCAAGCACATCGAG  
GAGGATCTCGGAAGCGAGGAGGCTCTGAGGGAGGCCGTGCAGTGCCTGGCGACCGCGGAGAGGTAC  
TTCAGCCAGGTGATGGCGGCGCGCTGAGGGAGGGCGCGGACCACCACGGCAAGGAGGCCCTGTGCG  
CGGGTGGCGGTGACGCGGTGCGACGTGGACATGGACGGCATCAGGGCGGCTACCAGGAGCAGTTCC  
GGCCAAGCTCGAGGACGCCGTCGCCGGCAGCGCGCACGGCCACTTCAAGGACGCGCTCGTCTCGCT  
CATCGTCGGCAAG

>HvAnn5 MLOC\_15543.3

ATGTCCGCCATCGCCGTCCCAGCCCCGTGCCGTCTCCCTCCGACGACGCCGAGGGCATCAGGAAGGC  
GCTCCAAGGATGGCGGGCGGACAAGGAGGCCCTGGTGCGCATACTGGCGCGGAGGACGGCGGCGCA  
GCGGTGCGCGATCCGCCGCGCTACGCCCTTCTCTTCCGGGAGCCCCCTCTCAACTCCTTCCGCCAGC  
GGCTCTCCCAGTACTGCCCGTACCGTGCACCTTCTGGAAGGCGATCATCCTGTGGACGATGGAC  
CCGGCGGAGCGGGACGCGAACCTGGTGCACGGCGCGCTGCGGGCGGAGGGGACGGCGACCACCTC  
GCCGTGCTGGTGGAGGTCTCGTGCAGCTCCGACCCCGACCACCTCGTGGCCGTCCGGCGCGCCTACC  
GCTCCCTCTTCGGTGTCTCCGTGGAGGAGGACCTCGCCTCCTGCCCCGCGCTCCAGCAGCCGCTCCGG  
AAGATGCTGGTGGAGCTCGTGAGCTCTACCGCTACGGCGGTGACCGCGTCGACGCCGACGTGGCGA  
AGCTGGAGGATCGCAGCTCTCGGAGGCCGTACAGGAAGAAGCAGCCGCACCACGACGAGGTGGTGC  
GGATCCTCAGACCCGAGCAAGCCCCAGCTCAGGGCCACGTTCCGGCGGTACAGGGAGGACCATGG  
CACCGACATCGTCGACGACATCGACAGCCGCTGCAGCAGCCAGTTCGCCAGGACGCTGAAGAGCGCC  
GTCTGGTGCCTGACCTCGCCGGAGAAGCACTTCGCGGAGATGATCAGGGAGTCCGTGGTGGGGCTGG  
GGACGTACGAGGACATGCTGACCAGGGTGGTGGTGTGCGGGCGGAGGTCGACATGGAGCAGATCAA  
GGAGGAGTATAGGGCCAGGTTCAAGACCACGGTACCTGCGACGTCGTCGACGACACCTCCTTCGGC  
TACAAGGACATCCTGCTGGCCTTGGTTGGCTGCGAGGAAGAG

>HvAnn6 MLOC\_55134.1





CGACGCCAACCGCCTGCTCGTCGGGCTCGTCAGCGCCTACCGCTACGAGGGCCCCCGCGTCGACGAG  
GGGCTCGCCAGGGAGGAGGCCGCGGGCGCTCGCCGGCGCCAAGGCCAGAGCGAGCTCGTGGCGCGG  
GTGCTCGCCACCAGGAGCAAGCCGACGCTCCGGGCGACCTTCAGGCTGTACAGGGAGCTCCACGGCA  
AGCCGCTGGAGGAGGAGTTTGGCGGGCAGGCGCCGTGCTTGCGGGAGGCCGTGAGGTGCCTCGAGT  
CCCCGGCGAGGTACTTCGGCGAGGTGATCGACGGGGCGTTCAAGGAGGGCGCGGACAAGCAGGCCA  
AGCCCGCCTTGACCCGCGTCGTCGTGTCCCGGTCCGACGCCGACATGGAGGAGATCAAGGACGCCTA  
CCTGAAACACCACGGGGCCAAGCTCGTGGACGCCGTGCGCAAGAACACCCACGGACATTACAGGGA  
CGCGCTGCTCGCCATGATCGGAAAAG

>HvAnn9 AK249691

ATGGCGAGCCTCACCTTGCCGCGGGCGCCCCGAACCCCCGCCAGGACGCCATCGACCTCCAAAAGG  
CCTTCAAAGGGTTTGGCTGTGATAGTACAACAGTTTCAAATATACTTGCTCACCGTGACTCAATGCAAC  
GTGGATACATTCAACAGGAATACAAAATATGTATTCCGAGGAACTTTCGCGTCGTATATCGTCTGAAC  
TCAGTGGAAACCACAAGAAAGCAATGTCGCTCTGGATTCTTGATCCTGCTGGACGTGATGCGACTGTT  
CTGAAAGAAGCTCTCAGTGTGAAAGTCTTGATCTGAAAGCAGCTACTGATATAATATGTTTCGAGGAC  
ACCATCACAGCTGCAAATAATGAAACAGACATATTATGCAAAGTTTGGTACTTATCTTGAGCATGACATT  
AGTCAGCAAACATCCGGCGATCATCAGAAGATCTTACTAGCCTATGTGGGCATTCACGCTACGAAGG  
TCCAGAGGTTGATCCCACTATAGTGACACATGATGCGAAGGACCTCTACAAAGCTGGTGAGAAGAAG  
CTGGGCACAGATGAGAAAACCTTCATCCGCATCTTACTGAACGCAGCTGGGCACACATGGCAGCTGT  
TGCTTCTGCTTACCAGCACATGTATGATCGGTCAATACAGAAGGTTGTGAAGAGTGAACATCTGGAA  
ACTTTGAAGTTGCTCTGATAACTATCCTCAGATGTGCTGAGAATCCAGCTAAGTATTTTGCTAAGGTGTT  
AAGGAAGTCCATGAAAGGTCTAGGTACTGATGACAAGACACTTGTAAGGGTTGTGGTAACGAGGACT  
GAGATTGATATGCAGTATATCAAGGCAGAATACTACAAGAAATACAAAAAGCCGTTAGCTGATGCTATC  
CATTACAGAAACATCAGGAGGTTATCGGACGTTCTCTTCTTGTGGTAGCCATTAG

>HvAnn10 MLOC\_54650.4

ATGGCCTCCCGTTCTCCTGCCACCGCAGGGTTCGAAAGCGAGTGCAGAGAGATCCATGGCGCGTGCG  
ATGAGCCCCGCGTCTGATCCGCTACCTGGCTCACCGGAGCGCGCCGGAGAGGCAGCAGATCAAGGC  
AACTTACCGCACAAATGTTTCGGCGAGGACCCCGTCGGCAGGCTTCATAAAACCCTCACGGCCAATCAGG  
ACAATGAGCTCTGCAATCTGCTCTACCTGTGGATGCTTGATCTGGCGGAGCGAGACGCGATCATGGCG  
AGGGACGCCATCGAGAGCGGGCGCGGGCCGATTACCGCGCCCTTGTTCGAGATCTTACGCGGGCGGA  
AGCAGGACCAGCTCTTCTTACCAAGCAGGCGTACCTGGCTAGGTTCAAGAAGAACCTGGAGCAGGA  
CATGGTACCGACCCCTCGCACCCCTTATCAGAGACTGTTGGTAGCTCTGGCAACCTCCCACAAGTCGC  
ACCACGATGAACCCAGCAGGCACATCGCGAAATGCGACGCCAGGCGATTGTACGACGCCAAGAACGG  
CGCCACGGGGTTCGGTTCGACGAGGCCGCTATTCTCGAGATGTTAGCAAGAGGAGCATCCACAGCTC  
AGGCTGGCGCTCTGCAGTTACAAGCACATATATGGGCATGACTTCACCAAAGCACTGAAGAAGAATTC  
GGCTGGTGATTTTGTAGAGTCTCTGAAAGTTGTTGTCAAGTGCATCCACAGTCTTCCAATTACTG  
CAAGTTACTGCAGAGAAGTATGCAACGCCAGAAACCAATAAAAAGGTTGGTTGCGAGGGCTATCTTG  
GGCAGCGATGACGTCGGTGTGAACGAGATCAAGTTAGCGTTCAAGAGTAACTTCGAAAGAAGTCTAG  
AAGATTTTCATCCATGAAAGCTTACCACAGAGTGATTACAGAGACTTTCTTTGGATATGGCAAGGGGGG  
CAGTGCCAGTGGCATCA

>HvAnn11 MLOC\_51591.2

ATGGCGACGCTCTCCGTCCCCGCCCGTCCCGGCCGTGGCCGAGGACTGCGAGCAGCTCCGCAAGG  
CGTTTCGCCGGGTGGGGACCAACGAGCGGCTCATCATCTCCATCCTGGCCACCGCGACGCCGCGCA  
GCGCCGCGCCATCCGCAAGCACTACGCCGACGCTACGGCGAGGAGCTGCTCCGCTCCATCACCAGC  
GAGATCCACGGCAAGTTTCGAGAGGGCGGTGATCCAGTGGACGCTGGACCCGGCGGAGCGGGACGCG  
GTGCTGGCCAACGAGGAGGCCAAGAAGTGGAAACCCGGGGGGCGCGCTCGTCGAGATCGCCTGC

GCGCGCACCCCGCGCACCTCTTCGCCGCCAAGCAGGCCTACCACGACCGCTTCAAGCGCTCGCTCG  
AGGAGGACGTCGCCCGCGCACGTACCCGGCGACTTCCGCAAGCTTTTGGTGCCTCTTGTAAGCGCGTA  
CCGCTATGATGGCCCGGAGGTGAATACGTCGTTGGCGCACTCTGAAGCCAAGATACTCCATGCGAAGA  
TCAGCGAGAAGGCCTACAGTGATGATGAGGTGCTCAGGATTCTCACTACAAGGAGCAAAGCTCAGCT  
ACTTGCAACATTCAACAGCTACAATGATCAGTTCAGTCACCCTATCACCAAGGACCTCAAGGAAGATC  
CCAAGGACGAGTTCCTCTCGACCCTGAGGGCGATCATAAGGTGTTTCACTTGCCCCGACAGATACTTT  
GAGAAGGTCATCCGGTTGGCTCTTGGTGGTGTCCGGTACAGACGAGCACACCCTTACTAGGGTGATAAC  
CACTCGTGCCGAGGTGGACCTGAAGGTGATAAAGGAGGCGTACCAGAAGAGGAACAGCGTCCCCCT  
GGAGAAGGCTGTTTCCAAGGACACAACCAGAGACTATGAAGATATGATGCTTGCCTTCTGGGAGCA  
GAGTAC

>HvAnn12 AK248515

ATGGCAACGCTCAAGGTCCCCTCCAACGTCCCCGCCCTCGCCGACGACTGCGACAACCTCCGCAAGG  
CCTTCCAAGGGTGGGGCACGAACGAGGCGCTCATCATCTCCATCCTGGGCCACCGCGACGCCGCGCA  
GCGCCGCGCCATCCGCAAGCACTACGCCGACACCTACGGCGAGGAGCTGCTCCGGAGCATCACCGAC  
GAGATCTCAGGCGACTTCGAGAGGGCCGTGATCCTGTGGACGCTGGACCCCGCGGAGCGGGACGCGG  
TGCTCGCCAACGAGACCGCCAAGAAGTGGCACCCGGGGAACCCCGTGCTCGTCGAGATCGCCTGCTC  
GCGCGGCTCCGCGCAGCTCTTCGCCGTCAGGCAGGCCTACCATGACCGCTTCAAGCGCTCGCTCGAG  
GAGGACGTCGCTGCGCACGTCACCGGCGACTTCCGCAAGCTCTTGGTGCCACTTGTAAGCTCATACCG  
CTATGAGGGACCAGAGGTCAACACAAGGTTGGCACATTCAGAGGCCAAAATACTGCATGAGAAGATC  
GAGCACAAGGCTTACGGTGATGATGAGATCATCAGAATCCTCACCAAGGAGCAAAGCTCAGCTGCT  
TGCAACTCAATAACTACAATGACACATTTGGTCACCCAATCACCAAGGATCTGAAGGCTGACCCCA  
AGGATGAGTTCTCAAACCCTGCGGGCGGTTATCCGGTGCTTACCTGCCCTGATAGGTACTTTGAG  
AAGGTTGCCAGGTTGGCCATTGCAGGGAATGGAACCGATGAGAACTCCCTCACTAGGGTCATAACGA  
CCC GCGCCGAGGTGGACCTGAAGCTGATCAAAGAGGCATACCAGAAGAGGAACAGTGTCCCCTTGG  
GAAGGCCGTCGACGGCGACACCTCCGGCGACTACGAGACCATGCTCCTTGCCCTCCTGGGGAAGGAG  
TGA

3). *Turartu*

>TuAnn1 TRIUR3\_22191

MASLSVPPVLTTPRDDAVALHKAFKFGFGCDSTTNAMLLWVLDPVGRDATILNQALNGDITDLRAATELLL  
AYLGVRRNEGPEVDPSAVTDDARELYQAGEKRVGTDERAFIRIFSERSWAHMVSVANAYQHMYARSLEKA  
VKSETTGNFQFGLLTILRCADTPAKYFAKVLHKAMKGLGTSNAALTRVAVTRTEVDMKYIKA EYHNKVM  
EGTDKEAEHPVPIYTDLGLSVPARTRSVAAAKAGRGSQWREGGEVEVRHGRGVAEASHGTGTAFVFALVE  
WEWRE

>TuAnn2 TRIUR3\_11010

MASISVPDPAPSPTEAESIRKAVQGWGTDENALIEILGHRATAQRAEIAVAYEGLYDKPLLRTLQDELSSH  
KGAMTLWAMPDPAARDAKLAYKALRKKGGDRHAWVLIEVACASSPDHLVAVRKAYCSAYDSSLEEDVAA  
CPLYKDPLKQARPCRSWHSPSFVAAVGPFLALAVAVLGAPGELAAELHGAVAACKQPLHGDVVRIVSSRS  
KPQLKATFQHYKREHGKAIDEVLEGNRNDKLSAMLKTAVWCLTSPEKHFAEVIRSSIIGLGTDEESLTRAIV  
SRAEVDLKKVKEEYKVRYKTTVTKDVVGDTSGYYQGILLTLIGAE

>TuAnn3 TRIUR3\_11009

MADEVQALTKAFSGLGGLGVDEPTMVAALANWRRQPEKRSGFRRSFPGLFKEQGVIERCEDEYMLRLAA  
EFSRFKNLMVLWAMHPWERDARLAHHVLHQAHPAAILVEACTRSAEELGARKAYMALFHSLEEDVA  
YRAKDKPYCSLLVGLVSAYRYEGPKVSDDTAKAEAKALGAAVKGAAGGRLVENEVVRILTTRSKPHLV

QTFKYYKELHGKHIQEDLGSEEALREAVRCLATPERYFSQVMAAALREGADHHGKEALARVAVTRSDVD  
MDAIRAAAYEQFGAKLEDAVAGSAHGHFKDALVSLIVGK

>TuAnn6 TRIUR3\_18622

MAEHTRISLRFSLSTSLLAIVVCCTPGLLWLRRLVARTGPAWRRRMASLSVPPVLTSPRHDAIALHRAFKGFG  
CDSTTVINILAHRAKAMLLWVLDPVGRDATILNQSLNGDITDLRAATEVICSRTPSQLQIMKQAYRARFG  
CYLEQDVTERTYGDHQKLLLAYLGIPRWAHLAAVADAYHHLYARSLDKAVKSETSGTFELGLLTLRCAES  
PARYFAKALHKAMKGLGTSDTTRGGVIRVGVTRAEVDMQYIKAEYHKKYKRSLADAIHSETSGNYRTFL  
LSLVGRDR

>TuAnn9 TRIUR3\_32496

MASLTLPPAPPNPRQDAIDLHKAFKFGFGCDTTTTVSNILAHRDSMQRGYIQQEYKTMYSSELSRRISSELSG  
NHKVVKIVEKSLLDKSNYCTAILAEEKALSILWILDPAGRDATVLKEALS AESLDLKAATDIICSRTPSQLQ  
IMKQTYAKFGTYLEHDISQQTSGDHQKILLAYVGIPTYEGPEVDPTIVTHDAKDLYKAGEKKLGTDEKTF  
IRIFTERS WAHMAAVASAYHHMYDRSLQKVVKNETSGNFEVALLTLRCAENPAKYFAKVLKSMKGLGT  
DDKTLVRVVTRTEIDMQYIKAEYKKYKPLADAIHSETSGGYRTFLSLVGS

>TuAnn10 TRIUR3\_04012

MAARSPAAAGFENECEIHGACDEPRRLSRLLAHRSASERQQIKATYRAMFGEDLAGRLHKTTLANQDNE  
LCNLLYLWMLDLAERDAIMARDAIESGAAADYRALVEVFTRRKQDQLFFTKQAYLSRFKKNLEQDMDTD  
PSHPYQRQLLVALATSHKSHHDEPSRHIKCDARRLYDAKNGGGTGSVDEAAILEMFSKRSIPQLRLALCS  
YKHIYGHDFTKALKKNLAGDFEESLRLVVKCIYSPSKYCKLLQRSMQRPEAHKRLVTRAILGSDDVGIN  
EIKLAFKSNFGKNFANFIHESLPQSDYREFLWLWQGGRCPVAS

>TuAnn11 TRIUR3\_16577

MATLSVPAAVPAVAEDCEQLRKAFAGWGTNERLIVSILAHRDAAQRRAIRRAYAEAYGEELLRAIGDEIHG  
KAVIQWTLDPAERDAELANEEAKKWQPGGRALVEIACARTPAQLFAARQAYHDRFKRSLEEDVAAHVTVG  
DFRKLLVPLVSAYRYDGEVNTSLAHSEAKLLNGKINEKAYSDDDEVVIRLITRTRSKAQLLATFNYSNDQFSH  
PITKDLKEDPKNEYLSTLRAIIRCFCTCPDRYFEKVVRLALGGVGTDEDTLTRVITTRAEVDLKVIKAYQKR  
NSVPLEKAVSKETSRDYEDMMLLALLGAEY

>TuAnn12 TRIUR3\_03306

MATLKVPSNPALADDCDNLKAFQGWGTNEALIISILGHRDASQRRAIRKHYADTYGEELLRSITDEISG  
DFERAVILWTLDPAERDAVLANETARKWHPGNPVLVEIACARGSKQLFAVRQAYHDRFKRSLEEDVASHV  
TGDFRKLLVPLVSSHRYEGPEVNTRLAHSEAKLLHEKIEHKAYADDEVIRILTTRSKAQLLATFNYSNDTFG  
HPITKDLKADPKDEFKTLRAVIRCFCTCPDRYFEKVARVAIAGNGTDENSLTRVITTRAEVDLKVIKAYQK  
RNSVPLEKAVAGDTSGDYESMLLALLGKE

>TuAnn1 TRIUR3\_22191

ATGGCGAGCCTGAGCGTGCCTCCGGTGCTCACGCCTCCGCGTGATGACGCCGTCGCTCTCCACAAGGC  
CTTCAAAGGGTTTCGGCTGCGACAGCACGACGAATGCTATGCTGCTTTGGGTCTCGACCCCGTGGGGC  
GTGACGCGACCATACTGAACCAGGCTCTCAACGGCGACATCACCGACCTGAGAGCCGCCACGGAGCT  
TTTGCTTGCGTACCTGGGAGTCCGGCGCAACGAAGGCCCGGAAGTTGATCCTTCGGCGGTGACAGAC  
GACGCGAGGGAGCTGTATCAAGCCGGCGAGAAGAGGGTGGGCACCGATGAGCGGGCCTTCATCCGCA  
TCTTCAGCGAACGCAGCTGGGCGCACATGGTGTCCGTGGCCAACGCTTACCAGCACATGTACGCCCGG  
TCCCTGGAGAAGGCCGTGAAGAGTGAGACGACAGGGAACCTCCAGTTCGGGCTGCTGACCATCCTCA  
GGTGCGCCGACACTCCGGCAAAGTACTTTGCCAAGGTCTGCACAAGGCGATGAAAGGCCTGGGCAC  
CAGCAACGCGGCGCTCACACGGGTGGCGGTGACGAGGACCGAGGTTGACATGAAGTACATCAAGGC  
AGAGTACCACAACAAGGTGATCATGGAGGGCACCGACAAGGAAGCAGAGCATCCTGTGCCAATCTAC  
ACCGACCTAGGGCTGAGCGTCCCGGCGCGGACGCGCTCCGTGGCCGCGGCAAAGGCGGGTCCGGGG  
TCCAGTGGCGTGAAGGCGGCGAGGTGGAAGTGCGGCATGGGCGTGGTGTAGCAGAGGCGAGCCAT

GGGACTGGCACGGCCTTCGTGTTTCGCGCTGGTGGAGTGGGAGTGGCGAGAG

>TuAnn1 TRIUR3\_11010

ATGGCCTCCATCTCGGTCCCGGACCCCGCCCCTTCCCCGACCGAGGATGC  
AGAGAGCATCAGAAAAGCAGTGCAAGGGTGGGGGACGGACGAGAACGCGCTGATCGAGATCCTGGG  
CCACCGGACGGCGGCGCAGCGCGGAGATCGCCGTCGCCTACGAGGGCCTCTACGACAAGCCCCCTC  
CTCCGCACGCTCCAGGACGAGCTCTCCAGCCACTTCAAGGGCGCGATGACGCTGTGGGCGATGGACC  
CGGCGGCGCGGGACGCCAAGCTGGCCTACAAGGCCCTCAGGAAGAAGGGCGGGCACCAGGCACGCCT  
GGGTGCTCATCGAGGTGCGCTGCGCGTTCGCGCCGACCACTCGTCGCGCTCAGGAAGGCCTACTG  
CTCCGCTACGACTCGTCGCTCGAGGAGGACGTCGCCGCTGCCGCTCTACAAGACCCCCCTCAAG  
CAGGCAAGGCCGTGCCGATCCTGGCATTCTCCTTCTTTCTGTCGCCGCCGTGGGTCCATTTCTTGCTCTT  
GCCGTTGCCGTTCTTGGTGCCTGGTGTGAGCTCGCGGCCGAGCTGCACGGCGCGGTGGCGGCAAGA  
AGCAGCCGCTGCACGGGACGTGGTCCGCATCGTCAGCTCCAGGAGCAAGCCGACGCTCAAGGCGA  
CGTTCCAGCACTACAAGCGAGAGCACGGCAAGGCCATCGACGAGGTTCTCGAGGGCAATCGCAACGA  
CAAGCTGTCGGCGATGCTGAAAAGTGCAGGCTGGTGCCTGACATCGCCGAGAAAGCACTTCGCAGAG  
GTGATCCGGAGCTCGATCATCGGGCTCGGCACCGACGAGGAATCCCTGACCAGAGCGATTGTCTCGCG  
CGCCGAGGTGACTTGAAGAAAGTGAAGGAGGAATACAAGGTGAGGTACAAGACGACGGTGACCAA  
GGATGTCGTCGGAGACACCTCCGGGTACTACCAGGGCATCCTGCTCACCTCATCGGGGCCGAGTAG

>TuAnn3 TRIUR3\_11009

ATGGCCGACGAAGTTCAGGCGCTCACCAAGGCCTTCTCAGGTCTGGGAGGCCTGGGCGTGGACGAGC  
CGACGATGGTGGCGGCGCTGGCGAACTGGCGGAGGCAGCCGAGAAAGCGGTCCGGGTTCCGGAGGA  
GCTTCCCGGGGCTGTTCAGGAGCAGGGCGTGATCGAGCGGTGCGAGGACGAGTACATGCTGCGCCT  
GGCCGCCGAGTTCTCCCGTTCAAGAACCTCATGGTGTGTGGGCGATGCACCCGTGGGAGCGCGAC  
GCCCCGCTCGCGCACACGTCTCCACCAGGCCACCCGCGCCATCCTCGTGGAGGTGCGCTGCA  
CCCCTCCGCGAGGAGCTCCTCGGCGCGCAAGGCCATCATGGCGCTTCCACCCTCCCTCGAG  
GAGGACGTCGCTACCGCGCCAAGGACAAGCCCTACTGCAGCCTGCTGGTGGGGCTGGTGTGAGCGCGT  
ACCGGTACGAAGGGCCCAAGGTGAGCGACGACACGGCCAAGGCGGAGGCAAGGCGCTGGGCGCG  
GCGGTGAAGGGCGCCGCGGCGGAGGCTGGTGGAGAACGAGGAGGTGGTCAGGATCCTCACCACC  
AGGAGCAAGCCGACCTCGTCCAGACCTTCAAGTACTACAAGGAGCTGCACGGCAAGCACATCCAGG  
AGGATCTGGGAAGCGAGGAGGCTCTGAGGGAGGCCGTGCGGTGCTGGCGACGCCGAGAGGTA  
TCAGCCAGGTGATGGCGGCGGCGCTGAGGGAGGGCGCGGACCACCACGCAAGGAGGCCCTGGCGC  
GGGTGGCGGTGACGCGGTGCGACGTGGACATGGACGCCATCCGGGCGGCCTACCAGGAGCAGTTCCGG  
GGCCAAGCTCGAGGACCCGTCGCCGCGAGCGCGCACGGCCACTTCAAGGACGCGCTCGTCTCCCTC  
ATCGTCGGCAAGTAA

>TuAnn6 TRIUR3\_18622

ATGGCGGAGCACACCCGCATCTCCCTGAGATTCTGAGCACGTCGCTGCTAGCCATCGTGGTGTGCTG  
CACGCCGGGGTTGCTGTGGCTCCGGCGCCTGGTGGCACGCACCGGCCCGCGTGGAGGCGAAGAATG  
GCGAGCCTGAGCGTGCTCCGGTGTCTACGTCCCCGCGCCATGACGCCATCGCCCTGCACAGGGCCTT  
CAAAGGTTTTGGGTGCGACAGCACGAGGATCAACATCCTGGCGCACCGCGACGCGAAGGCGATG  
CTGCTGTGGGTGCTGGACCCCGTGGGCCGCGACGCCACGATACTGAACCAGTCCCTCAACGGCGACA  
TCACCGACCTGCGCGCCGCCACGGAGGTGATCTGCTCCCGGACGCCGTCGCAGCTGCAGATCATGAA  
GCAGGCCTACCGCGCCCGCTTCGGTTGCTACCTCGAGCAGGACGTCACCGAGCGCACCTACGGCGAC  
CACCAGAAGCTTCTGCTGGCCTACCTGGGCATCCCGCGCTGGGCGCACCTCGCCCGCTCGCCGACG  
CCTACCACCACTTACGCGCGCTCCCTGGACAAGGCTGTGAAGAGCGAGACGTCGGGCACCTTCGA  
GTTGGGGCTGCTGACGATCCTCCGGTGCGCCGAGAGCCCGCGAGGTACTTCGCCAAGGCGCTGCAC  
AAGGCGATGAAGGGGCTGGGCACAAGCGACACGACGCGGGGAGGCGTGATACGGGTGGGGTACC

AGGGCGGAGGTGGACATGCAGTACATCAAGGCCGAGTACCACAAGAAGTACAAGCGCTCGCTGGCCG  
ACGCCATCCACTCCGAGACCTCCGGCAACTACCGGACCTTCTCCTCTCCCTCGTCGGCCGCGACCCG  
TAA

>TuAnn9 TRIUR3\_32496

ATGGCGAGCCTCACCTTGCCGCCGGCGCCCCCTAACCCCGCCAGGACGCCATCGACCTCCACAAGG  
CCTTCAAAGGGTTTGGCTGTGATACTACAACAGTTTCAAATATACTTGCTCACCGTGACTCAATGCAAC  
GTGGATACATTCAACAGGAATACAAACTATGTATTCTGAGGAACTTTCACGTCGTATATCGTCTGAAC  
TCAGTGAAACCACAAGGTATGGAAAATTGTAGAAAAATCTTTATTGCATGATAAATCAAATATTGCA  
CAGCTATACTGGCTGAAGAGAAAGCACTGTCGCTCTGGATTCTTGATCCTGCTGGACGTGATGCGACT  
GTTCTGAAAGAAGCTCTAAGCGCTGAAAGTCTTGATCTGAAAGCAGCTACTGATATAATTTGTTCCAG  
GACACCATCACAGCTGCAAATAATGAAACAGACATATTATGCAAAGTTTGGTACTTATCTTGAGCATGA  
CATTAGTCAGCAAACATCCGGCGATCATCAGAAGATCTTACTAGCCTATGTTGGCATTCCACGCTACGA  
AGGCCCGGAGGTTGATCCCACTATAGTGACACATGATGCGAAGGACCTCTACAAAGCTGGTGAGAAA  
AAGCTGGGCACAGATGAGAAAACCTTCATCCGCATCTTCACTGAACGCAGCTGGGCACACATGGCAG  
CTGTTGCTTCTGCTTACCATCACATGTATGATCGGTCGTTACAGAAGGTTGTGAAGAATGAAACATCTG  
GAAACTTTGAAGTTGCTCTGTAACTATCCTCAGATGTGCTGAGAATCCAGCGAAGTATTTTGCTAAGG  
TGTTGAGGAAGTCCATGAAAGGTCTAGGTACTGATGACAAGACACTTGTAAGGGTTGTGGTGACAAG  
GACTGAGATTGATATGCAGTATATCAAGGCAGAATATTACAAGAAATACAAAAGCCGTTAGCTGATGC  
TATCCATCCGAAACATCAGGCGGTTATCGGACGTTTCTGCTTTCTTGTGGTAGCCATTAG

>TuAnn10 TRIUR3\_04012

ATGGCCGCCCCGTTCTCCTGCCGCCGAGGGTTCGAAAACGAGTGCAGAGAGATCCATGGCGCGTGCG  
ACGAGCCGCGCCGCTGAGCCGCTCCTGGCTCACCGGAGCGCGTCGGAGAGGCAGCAGATCAAGG  
CGACGTACCGTGCAATGTTTCGGCGAGGACCTCGCCGGCAGGCTCCACAAAACCCTCACGGCCAATCA  
GGACAATGAGCTCTGCAACCTGCTCTACCTGTGGATGCTTGACCTGGCGGAGCGAGACGCGATCATGG  
CGAGGGACGCCATCGAGAGCGGCGCGGCGCCGATTACCGCGCCCTTGTTCGAGGTCTTCACGCGGCG  
GAAGCAGGACCAGCTCTTCTTACCAAGCAGGCGTACCTGTCCAGGTTCAAGAAGAACCTGGAGCAG  
GACATGGACACCGACCCCTCGCACCCCTTATCAGAGACAGCTATTGGTAGCTCTGGCAACCTCCCACAA  
GTGCGACACGATGAACCCAGCCGGCACATCGCGAAGTGCAGCGCCAGGCGATTGTACGACGCCAAG  
AACGGTGGCGGCACGGGATCGGTGACGAGGCCGCCATCCTCGAGATGTTCAAGCAAGAGGAGCATCC  
CACAGCTCAGGCTGGCGCTCTGCAGTTACAAGCATATATATGGGCATGACTTCACCAAAGCACTGAAG  
AAGAATTTGGCTGGTGATTTTGAAGAGTCTCTGAGACTTGTGTCAAGTGCATCTACAGTCTTCCAA  
GTATTACTGCAAGTTACTGCAGAGAAGCATGCAACGCCAGAGCCATAAAAGGTTGGTTACGAGG  
GCTATCTTGGGCAGCGACGACGTCGGCATAAACGAGATCAAGTTGGCGTTCAAGAGTAACTTCGGAA  
AGAACTTCGCAAATTTTCATCCATGAAAAGCTTACCACAGAGTGATTACAGAGAGTTTCTTTGGTTGTGG  
CAAGGGGGCCGGTGCCAGTAGCATCATAA

>TuAnn11 TRIUR3\_16577

ATGGCGACGCTCTCCGTCCCCGCCGCGTCCCGGCCGTCGCCGAGGACTGCGAGCAGCTGCGCAAGG  
CGTTTCGGGGGTGGGGCACCAACGAGCGCCTCATCGTCTCCATCCTGGCGCACCGCGACGCCGCGCA  
GCGCCGCGCCATCCGCCGCGCTACGCCGAGGCTACGGCGAGGAGCTGCTCCGCGCCATCGGCGAC  
GAGATCCACGGCAAGGCGGTGATCCAGTGGACGCTGGACCCGGCGGAGCGGGACGCGGAGCTGGCC  
AACGAGGAGGCCAAGAAGTGGCAGCCGGGGGGCCGCGCGCTCGTTCGAGATCGCCTGCGCGCGCACCC  
CCC GCGCAGCTCTTCGCCGCTAGGCAGGCTACCACGACCGCTTCAAGCGCTCGCTCGAGGAGGACG  
TCGCCGCGCACGTCACCGGCGACTTCCGCAAGCTTTTGGTGCCTCTTGTAAGCGCATACCGCTACGAT  
GGCCCCGAGGTGAACACATCGTTGGCACACTCTGAAGCCAAATTACTCAACGAAAGATCAACGAGA  
AGGCCACAGCGATGATGAGGTCGTCAGGATTCTCACTACAAGGAGCAAGGCTCAGCTACTCGCAACA

TTCAACAGCTACAATGATCAGTTCAGTCACCCCATCACCAAGGACCTCAAGGAAGACCCCAAGAACG  
AGTACCTCTCAACCTGAGGGCGATCATAAGGTGTTTCACCTGCCCTGACAGATACTTTGAGAAGGTC  
GTCCGGTTGGCCCTTGGAGGCGTCGGCACAGACGAGGACACCCTTACGAGGGTCATAACCACTCGCG  
CTGAGGTGGACCTGAAGGTGATAAAGGAGGCGTACCAGAAGAGGAACAGCGTCCCGCTGGAGAAGG  
CTGTTTCCAAGGAAACAAGCAGAGACTATGAAGATATGATGCTTGCACCTTCTGGGGCAGAGTACTGA

>TuAnn12 TRIUR3\_03306

ATGGCGACGCTCAAGGTCCCCTCCAACGTCCCGGCCCTCGCCGACGACTGCGACAACCTCCGCAAGG  
CCTTCCAAGGGTGGGGCACGAACGAGGCGTCATCATCTCCATCCTCGGCCACCGCGACGCGTCGCA  
GCGCCGCGCCATCCGCAAGCACTACGCCGACACCTACGGCGAGGAGCTGCTCCGGAGCATCACCGAC  
GAGATCTCCGGCGACTTCGAGAGGGCCGTGATCCTGTGGACGCTGGACCCGGCGGAGCGGGACGCGG  
TGCTCGCCAACGAGACCGCCAGGAAGTGGCACCCCGGGAACCCCGTGCTGGTTCGAGATCGCCTGCGC  
GCGCGGCTCCAAGCAGCTCTTCGCCGTCAGGCAGGCCTACCATGACCGCTTCAAGCGCTCGCTCGAG  
GAGGACGTCGCTTCCCACGTCACCGGCGACTTCCGCAAGCTGTTGGTGCCACTTGTAAAGCTCACACC  
GCTACGAGGGACCAGAGGTCAACACAAGGTTGGCTCATTCAGAAGCCAAATTACTACACGAGAAGAT  
TGAGCATAAGGCTTATGCTGATGATGAGGTCATCAGAATTCTCACCACCAGGAGCAAAGCTCAGCTGC  
TTGCAACATTCAATAATTACAATGATACATTTGGTCACCCGATCACTAAGGATCTGAAGGCTGACCCCA  
AGGATGAGTTCTCAAGACCTGCGGGCGGTCATCCGGTGCTTACCTGCCCTGATAGGTAAGTTTGGAG  
AAGGTGGCCAGGGTGGCCATTGCAGGGAATGGAACCGATGAGAACTCCCTCACTAGGGTCATACCA  
CCCAGCGGAGGTGGACCTGAAGCTGATCAAAGAGGCGTACCAGAAGAGGAACAGTGTTCCTGG  
AGAAGGCCGTCGCAGGCGACACCTCCGGCGACTACGAGAGCATGCTCCTTGCCCTCTGGGGAAGGA  
GTGA

4). *A. tauschii*

>AeAnn1 AEGTA07604

MASLSVPPVLTTPRDDAVALHKAFKGFCDSTTQNAMLLWVLDPAGRDATILNQALNGDITDLRTATEVIC  
SRTPSQLQIMKQTYRARFGCYLEHDITERTYGDHQKILLAYLGVPRNEGPEVDPSAVTNDARELYRAGEKR  
VGTDERAFIRIFTESSRAHLVSIANAYQHMYARSLEKTLKSETTGNFQFGLLTILRCADTPAKYFAKVLHKA  
MKGLGTSNAALIRVAVTRTEVDMKYIKAIEYHNKYKGSIAEAIHSETSGNYRTFLLSLVGRDR

>AeAnn2 AEGTA15612

MASISVPDPVPSPTEDAESIRKAVQGWGTDENALIEILGHRATAQRAEIAVAYEGLYDKPLLRTLQDELSSH  
FKGAMTLWAMDPAARDAKLAYKALRKKGGDRHAWVLIEVACASSPDHLVAVRKAYCSAYGSSLEEDVA  
ACPLYKEPLKQARPCGSWHSPLFFWSPWVHFLLLPLLFLVRLVSSYRYGGEHVDGELARAEAADLHGAV  
AAKKQPLHGDVVRIVSSRSKPQLKATFQHYKQEHGKAIDEVLEGNRNDKLSAMLKTAVWCLTSPEKHFA  
EVIRSSIIGLGTDEESLTRAIVSRAEVDMMKKVKEEYKVRYKTTVTKDVGDTSGYYQGILLTLIGAE

>AeAnn3 AEGTA29052

MADEVQALTKAFSGLGGLGVDEPTMVAALANWRRQPEKRSRFRKSFPGFLKQHGVIERCEDEYMLHLA  
AEFSRFLNMLVWAMHPWERDARLAHHVLHQAHPAAIVVEVACTRSAEELLGARKAYMALFHHSLEED  
VAYRAKDKPYCSLLVGLVSAYRYEGPKVSDDTAKAEAKALGAAVKSAGGGKLVENEEVVRILTTRSKPHL  
VQTFKYKELHGKYIEEDLGSEEALREAVQCLATPERYFSQVMAAALREGADHHGKEALARVAVTRSDV  
DMDGIRAAAYQEFGAKLEDAVAGSAHGFKDALVSLIVGK

>AeAnn4 AEGTA21287 (genebank: EMT22984.1)

MATITVPQVVPSPVEDAEALMKAFQGWGTDEQAVIYILAHRDAAQRKLIRLAYEEKYDERLTDRESELS  
GDLQTAMGYWVLDPTERQAVIANAATKCIDEYYPVIVEIACANSPAELEVKRAYHAIYKRSLEEDVAAGA  
TGNLRNLLVALVSAYRYDGDEVNGGLARSEAKIIQADVKNVGTADHGELIRVLGTRSRALQGATFNCFRD

EHGTTVTKALLHAPDTTGYARALRTAARCIADTDKYFAKVLNRNAMHKSQTDEESLLRVVVMRAEKDLR  
GIKDEFHKRASVALEQAIKETS GDFKTFITALVGT SQ

>AeAnn5 AEGTA42363

MPTGTAAAEAGHGTPYVDPEDGEEGEW GARWRADKEALVRILARRTAAQRSAIRRAYAFLFREPLLSFR  
QLRSRQYCPVTVDFWVRQRTHASLRRRSSCGRWTRRSGRTRWCTARCGEGTATTSPCWWRSRARPDP  
PAGXAYRSLFGCSVEEDLASCAALQQPLRKMLVSLVSSYRYGGDRVDADVAKLEASQLSEAVRRKQPHH  
DEVVRLSTRSKPQLRATLRRYREDHGTDIVIDIDSRSSQFARTLKS AVWCLTSPEKHFAEMIRESV VGLG  
TYEDMLTRVVVSRAEIDMRQIKEEYRARFKTTVTCDVDDTSFGYKDILLALVGGEEE

>AeAnn6 AEGTA16509

MASLSVPPVLTSPRHDAIALHRAFKGFGCDSTTVINILAHHRDAKAMLLWVLDPVGRDAAILNQSLNGDIT  
DLRAATEVICSRTPSQLQIMKQTYRARFGCYLEQDITERTYGDHKKLLAYLGIPRAEVD MQYIKAEYHK  
KYKRSLADAIHSETSGNYRTFVLSLVGRDR

>AeAnn7 AEGTA11977

MPCMVTCVHDEGGGADEKALVEILGRRRTAAQRAEIRRAYASLYKESLLTRLHGELSGHFQKAMVLLATDP  
AERDAKLAREALGRRGDDRD AWVLIEAACAAAPDHLVAVRRRAYRSLHGSSLEEDVAACSAFQEPLRKVT  
TPGEEQSNPFQSILLVSLVRSYRCAEESVDM DVAKLEAAQLAEAIRRKKQPHAGEVVRIVSTRSKPQLAAT  
FRCYKEQHGS DIEDMKQYSSSQFARMLKIAVWCLTSPEKHFAEVIRYSILGLGTDEDALTRAI VSRADIDM  
KKIKQEYRVRFKTTVTDVVGDTS GYYMDILLALV GKE

>AeAnn9 AEGTA10144

MASLTLPAPPNPRQDAIDLHKAFKFGFGCDSTTVSNILSHRDSMQRGYIQQEYKTM YSEELSHRISSELSGN  
HKVVKIVEKSLLDKSNYCTAILAEKALS WILDPAGRDATVLKEALSAESLDLKAATDIICSRTPSQLQI  
MKQTY YAKFGTYLEHDISQQASGDHQKILLAYV GIPRYEGPEVDPTIVTHDAKDLYKAGEKKLGTDEKTFI  
RIFTERS WAHMAAVASAYRHM YDRSLQKV VKNETSGNFEVALLTILRCAENPAKYFAKVL RKS MKGLGT  
DDKTLVRVVVTRTEIDMQYIKAEY YKKYKKPLADAIHSETSGGYRTFLLSLVGS H

>AeAnn10 AEGTA28110

MAARSPAAA GFENE CREIHGACDEPRRLSRLLAHRSASERQQIKATYRAMFGEDLAGRLHKTLTANQDNE  
SQHGLPLQLCNLLYLWMLDLAERDAIMARDAIESGAAADYRALVEVFTRRKQDQLFFTKQAYLARFKKN  
LEQDMVTDPSHPYQRL LVALATSHKSHHDEPSRHIAKCDARRLYDAKNGGGTGSVDEAAILEMFSKR SIP  
QLRLALCSYKHIYGHDFTKALKKNLAGDFEESLRVVVKCIYTPSKY YCKLLQRSMQRPEADKRLVTRAIL  
GSDDVGINEIKLAFKSNFGKNLADFIHESLPQSDYREFLWLWQGGQCLVAS

>AeAnn11 AEGTA31729

MATLSVPAAVPAVAEDCEQLRKAFAGWGTNERLIVSILAHRDAAQRRAIRRAYAEAYGEELLRAIGDEIHG  
KFERAVTQWTLDP AERDAELAGEEAKKWQPGGRALVEIACARTPAQLFAAKQAYHDRFKRSLEEDVAAH  
VTGDFR KLLVPLVSAYRYDGPEVNTSLAHSEAKILNGKINEKAYS DDEIVRILTTRSKAQLLATFN SYNDQF  
SHPITKDLKEDPKNEFLSTLRAIIRCFTCPDRYFEKVVRLALGGVGT DENTLTRVITRAEVDLKV IKEYQ  
KRNSVPLEKAVSKETS RDYEDMMLALLGAEY

>AeAnn12 AEGTA27331

MATLKVPSNDPALADDCDNL RKA FQGWGTNEALIISILGHRDAAQRRAIRKHYADTYGEELLRSITDEISG  
DFERAVILWTLDP AERDAVLANETAKKWHPGNPV LVEIACARGSKQLFAARQAYHDRFKRSLEEDVAAHV  
TGDFRKYLIPLGYIQIFSCDGGFCYLVPGHFLILELLVPLVSSHRYEGPEVNTRLAHSEAKLLHEKIEHKAY  
GDDEVIRILTTRSKAQLLATFN NYNDTFGHPITKDLKADPKDEFKTLRAVIRCFTCPDRYFEKVARLAIAG  
NGTDENSLTRVITRAEVDLKL IKEYQKRNSVPLEKAVAGDTS GDYESMLLALLGKE

>AeAnn1 AEGTA07604

ATGGCGAGCCTGAGCGTGCCTCCGGTGCTCACGCCCCGCGGATGACGCCGTCGCTCTCCACAAGG  
CCTTCAAAGGTTTCGGCTGCGACAGCAGCAGCAGCAATGCTATGCTGCTTTGGGTCCTCGACCCTGCT



GGGCGTGATGCGACCATACTGAACCAAGCTCTCAACGGCGACATCACCGACCTGAGAACCGCCACCG  
AGGTTATCTGCTCCAGGACGCCGTGCGAGCTGCAGATCATGAAGCAAACCTACCGTGCGAGGTTCCGGT  
TGCTACCTCGAGCATGACATCACCGAACGCACCTATGGAGATCATCAGAAGATTTTGGCTTGCCTACCTG  
GGAGTCCCACGCAACGAAGGCCCGGAAGTTGATCCTTCGGCGGTGACAAACGACGCGAGGGGAGCTG  
TATAGGGCCGGCGAGAAGAGGGTGGGCACCGATGAGCGGGCCTTCATCCGCATCTTCACCGAAAGCA  
GCAGGGCACACCTGGTGTCCATCGCCAACGCTTACCAGCACATGTACGCCCGGTCCCTGGAGAAGAC  
CCTGAAGAGTGAGACGACAGGGAACCTCCAATTTCGGGCTGCTGACCATCCTCAGGTGCGCCGACACT  
CCGGCAAAGTACTTTGCCAAGGTCCTGCACAAGGCGATGAAAGGCCTGGGCACCGCAACGCGGGC  
CTCATAAGGGTGGCGGTGACGAGGACCGAGGTCGACATGAAGTACATCAAGGCAGAGTACCACAACA  
AGTACAAGGGGTCGCTGGCTGAAGCTATCCACTCCGAGACGTCAGGGAACCTACCGAACCTTCCTCCTC  
TCGCTCGTCGGCCGGACCGCTAA

>AeAnn2 AEGTA15612

ATGGCCTCCATCTCGGTCCCGGACCCCGTCCCTTCCCCAACCGAGGACGCAGAGAGCATAAGAAAAG  
CAGTACAAGGGTGGGGGACGGACGAGAACGCGCTGATCGAGATCCTCGGCCACCGGACGGCGGGC  
AGCGCGCGGAGATCGCCGTGGCCTACGAGGGCCTTACGACAAGCCCCTCCTCCGCACGCTCCAAGA  
CGAGCTCTCCAGCCACTTCAAGGGCGCGATGACGCTGTGGGCGATGGACCCGGCGGGCGGGACGCC  
AAGCTGGCCTACAAGGCCCTCAGGAAGAAGGGCGGGGACCGGCACGCCTGGGTGCTCATCGAGGTC  
GCCTGCGCGTCGTCGCCGACCACCTCGTCGCCGTCAGGAAGGCCTACTGCTCCGCCTACGGCTCGTC  
GCTCGAGGAGGACGTCGCCGCTGCCGCTCTACAAGGAGCCCCTCAAGCAGGCAAGGCCGTGCGGA  
TCCTGGCATTCTCCTCTCTTTTTTTGGTCGCCGCCGTGGGTTTCAATTTCTTGTGTTGCCGTTGCTGTTCT  
TGGTGCGCCTGGTGAGCTCGTACCCTACGGCGGGCAGCAGTCGATGGCGAGCTGGCGAGGGCGGA  
GGCGGCCGATCTGCACGGCGGGTGGCGCCAAGAAGCAGCCGCTGCACGGCGACGTGGTCCGCATC  
GTCAGCTCCAGGAGCAAGCCGACGCTCAAGGCGACGTTCCAGCACTACAAGCAGGAGCACGGCAAG  
GCCATCGACGAGGTTCTCGAGGGCAATCGCAACGACAAGCTCTCCGCGATGCTGAAAACCGCGGTCT  
GGTGCCTGACATCGCCCGAGAAGCATTTCGAGAGGTGATCCGGAGCTCAATCATCGGGCTCGGCACC  
GACGAGGAGTCCCTGACCAGAGCGATCGTCTCGCGCGCCGAGGTGACATGAAGAAAAGTCAAGGAG  
GAATACAAGGTGAGGTACAAGACGACGGTGACCAAGGACGTCGTCGGCGACACTTCCGGGTACTACC  
AGGGCATCCTGCTCACCCCTCATCGGGGCCGAGTAG

>AeAnn3 AEGTA29052

ATGGCCGACGAAGTTCAGGCTCTACCAAGGCCTTCTCAGGTCTGGGAGGCCTGGGCGTGGACGAGC  
CGACGATGGTGGCAGCGCTGGCGAACTGGCGGAGGCAGCCGGAGAAGCGGTCCGGGTTCCGGAAGA  
GCTTCCCGGGGCTGTCAAGCAGCACGGGTGATCGAGCGGTGCGAGGACGAGTACATGCTGCACCT  
GGCCGCCGAGTTCTCCCGCTTCAAGAACCTCATGGTGTGTGGGCGATGCACCCGTGGGAGCGCGAC  
GCCCCCTCGCGCACACGTCCTCCACCAGGCCACCCGGCCGATCGTCGTGGAGGTCGCTGCA  
CCCCGCTCCGCCGAGGAGCTCCTCGGCGCGCGCAAGGCCTACATGGCGCTCTCCACCCTCCCTCGAG  
GAGGACGTCGCTACCAGCGCCAAGGACAAGCCATACTGCAGCCTGCTGGTGGGGTGGTGGAGCGCGT  
ACCGGTACGAAGGGCCCAAGGTGAGCGACGACACGGCCAAGGCGGAGGCCAAGGCGCTGGGCGCG  
GCGGTGAAGAGCGCCGGCGGGCAAGCTGGTGGAGAACGAGGAGGTGGTCAGGATCCTCACCACC  
AGGAGCAAGCCTCACCTCGTCCAGACCTTCAAGTACTACAAGGAGCTGCACGGCAAGTACATCGAGG  
AGGATCTCGGAAGCGAGGAGGCTCTGAGGGAGGCCGTGCAGTGCCTGGCGACGCCGGAGAGGTA  
TCAGCCAGGTGATGGCGGCGGCTGAGGGAGGGCGCGGACCACCACGGGAAGGAGGCCCTGGCGC  
GGGTGGCGGTGACGCGGTCGGACGTCGACATGGACGGCATCCGGGCGGCCTACCAGGAGCAGTTCGG  
GGCAAGCTCGAGGACGCCGTCGCCGCGAGCGCGCACGGCACTTCAAGGACGCGCTCGTCTCGCTC  
ATCGTCGGCAAGTAA

>AeAnn4 AEGTA21287

ATGGCCACGATCACAGTTCCTCAAGTTGTCCCTTCTCCGGTTGAAGATGCTGAGGCGCTCATGAAGGC  
CTTCCAAGGATGGGGCACTGACGAGCAGGCAGTGATCTACATACTAGCTCACCGGGACGCGGCGCAG  
AGGAAGCTGATCCGGCTGGCGTACGAAGAGAAATACGACGAGCGCCTCACCGACCGGCTCGAATCAG  
AGCTCTCCGGCGATCTTCAGACGGCGATGGGCTACTGGGTACTCGACCCACGGAGAGGCAGGCCGT  
GATCGCCAACGCCGCCACGAAATGCATCGACGAGGAGTACCCCGTGATCGTGGAGATCGCCTGCGCC  
AACTCGCCCGCCGAGCTCCTGGAAGTGAAGCGGGCCTACCACGCCATCTACAAGCGCTCGCTGGAGG  
AAGACGTCGCCGCTGGCGCCACGGGAAACCTCCGCAATCTCTTGGTCGCTCTGGTGAGCGCCTACAG  
GTACGACGGCGATGAGGTGAACGGCGGGCTAGCGAGGTTCGGAGGCGAAGATCATTCAAGCGGACGT  
GAAAAACGGCGTACGGCGGATCACGGGGAGCTCATCAGGGTCTAGGCACCAGGAGCAGAGCCCA  
GCTCGGGCCACGTTCAACTGCTTCAGAGATGAGCACGGCACCACCGTCACCAAGGCCCTGCTGCAT  
GCCCCGACACGACGGGCTACGCGCGTGCCTGCGGACCGCGGGCAGGTGCATCGCCGACACAGAC  
AAGTACTTCGCAAGGTCCTGAGGAACGCGATGCACAAGTCGGGGACCGACGAGGAGAGCCTGCTCC  
GGGTGGTGGTGATGCGCGCGGAGAAGGACCTCAGGGGCATCAAAGACGAGTTCCACAAGAGGGCGT  
CGGTTGCCCTGGAGCAAGCCATCGCCAAGGAAACCTCCGGTGACTTCAAGACCTTCATCACGGCTCTT  
GTTGGGACTAGCCAATAA

>AeAnn5 AEGTA42363

ATGCCAACAGGGACAGCTGCAGCCGAGGCCGGACATGGGACGCCTTATGTGGATCCGGAAGATGGGG  
AGGAAGGAGAGTGGGGCGCGAGATGGCGGGCGGACAAGGAGGCCCTGGTGCGCATACTGGCACGGA  
GGACGGCGGGCGCAGCGGTGCGCGATCCGCCGCGCCTACGCCTTCTCTCCGGGAGCCCCTCTCAA  
CTCCTTCCGCCAGCGGCTCTCCCGCCAGTACTGCCCCGTCACCGTCGACTTCTGGGTACGGCAGCGCA  
CGCATGCATCTCTCCGAAGGCGGTCATCTGTGGACGATGGACCCGGCGGAGCGGGACCGGAACCTG  
GTGCACGGCGCGCTGCGGGCGGAGGGGACGGCGACCACCTCGCCGTGCTGGTGGAGGTCTCGTGC  
GCGGCCGACCCGACCCCGCCGGNGCGCCTACCGCTCCCTCTTCGGCTGCTCCGTGGAGGAGGAC  
CTCGCCTCTGCGCCGCTCCAGCAGCCGCTCAGGAAGATGCTGGTGAGCCTCGTGAGCTCCTACCG  
CTACGGCGGTGACCGCGTCGACGCGGACGTGGCGAAGCTGGAGGCGTCGCAGCTCTCGGAGGCCGT  
CCGGAGGAAGCAGCCGACACGACGAGGTGGTGGGATCCTCAGCACCCGGAGCAAGCCCCAGCT  
CAGGGCGACGCTCCGGCGGTACAGGGAGGACCACGGCACCGACATCGTCGAGGACATCGACAGCCG  
CTGCAGCAGCCAGTTCGCCAGGACGCTGAAGAGCGCCGTCTGGTGCCTGACCTCGCCGGAGAAACAC  
TTCGCGGAGATGATCAGGGAGTCGGTGGTGGGGCTGGGGACTTACGAGGACATGCTGACGAGGGTGG  
TGGTGTGCGGGCGGAGATCGACATGAGGCAGATCAAGGAGGAGTACAGGGCCAGGTTCAAGACCA  
CCGTGACCTGCGACGTCGTTGACGACACCTCCTTCGGCTACAAGGACATCCTGCTGGCCCTGGTTGGC  
GGCGAGGAAGAGTGA

>AeAnn6 AEGTA16509

ATGGCGAGCCTGAGCGTGCCTCCGGTGCTCACGTCCCCGCGCCACGACGCCATCGCCCTCCACAGGG  
CCTTCAAAGGGTTCGGGTGCGACAGCACGACGGTGATCAACATCCTGGCGCACCGCGACCGGAAGGC  
GATGCTGCTGTGGGTGCTGGACCCCGTGGGCCGCGACGCCGCCATCCTGAACCAGTCCCTCAACGGC  
GACATCACCGACCTGCGCGCCGCCACGGAGGTCATCTGCTCCCGGACGCCGTCGACGCTGCAGATCAT  
GAAGCAGACCTACCGCGCCCGCTTCGGGTGCTACCTCGAGCAGGACATCACCGAGCGCACCTACGGC  
GACCACCACAAGCTTCTGCTGGCGTACTTGGGGATCCCGCGGGCAGAGGTGGACATGCAGTACATCA  
AGGCCGAGTACCACAAGAAGTACAAGCGCTCGCTGGCCGACGCCATCCACTCCGAGACCTCCGGGAA  
CTACCGGACCTTCGTCTCTCCCTCGTCGGCCGTGACCGCTAA

>AeAnn7 AEGTA11977

ATGCCATGCATGGTAACATGCGTACATGACGAAGGCGGGGGCGCGGACGAGAAGGCGCTGGTGGAGA  
TCCTCGGCCGCGAACCGCCGCGCAGCGCGCCGAGATCCGCCGGCCCTACGCGAGCCTCTACAAGGA  
GTCCCTCCTCACCCGCTCCACGGCGAGCTCTCCGGCCACTTCCAGAAAGCGATGGTGCTGCTGGCGA

CGGACCCGGCGGAGAGGGACGCCAAGCTGGCGAGGGAGGCCCTGGGCAGGCGGGGCGACGACAGG  
GACGCGTGGGTGCTCATCGAGGCCGCCTGCGCCGCCGCGCCGGACCACCTCGTCGCCGTCCGCCGCG  
CGTACCGGTCCCTCCATGGATCCTCGCTGGAGGAGGACGTCGCCGCCTGCTCCGCGTTCCAAGAACCG  
CTCAGGAAGGTGACTACTCCAGGAGAAGAACAGAGCAATCCATTCCAGAGTATACTGCTGGTGAGCC  
TGGTGAGGTCGTACCGGTGCGCGGAGGAGAGCGTGGACATGGACGTGGCGAAGCTGGAGGCCGCGC  
AGCTGGCGGAGGCCATCCGGAGGAAGAAGCAGCCGCACGCCGCGAGGTCGTCCGGATCGTGAGCA  
CAAGGAGCAAGCCGAGCTCGCCGCCACGTCCGGTGTACAAGGAACAACATGGCAGCGACATCGA  
AGAGGACATGAAGCAGTACAGCAGCAGCCAGTTTGCAAGGATGCTCAAGATTGCTGTCTGGTGCCTC  
ACATCTCCTGAAAAGCACTTCGCAGAGGTTATCAGGTACTCCATCTTAGGGCTTGAACGGACGAGGA  
CGCACTACCAGGGCAATCGTGTCCAGGGCCGACATCGACATGAAAAGATCAAGCAAGAGTACAGG  
GTCAGATTCAAGACGACCGTAACAGACGATGTCGTCGGCGATACCTCGGGGTATTACATGGATATCTTG  
TTGGCCTTAGTAGGGAAGGAGTGA

>AeAnn9 AEGTA10144

ATGGCGAGCCTCACCTTGCCGCCGGCGCCCCGAACCCGCGCCAGGACGCCATCGACCTCCACAAGG  
CCTTCAAAGGGTTTGGCTGTGATAGTACAACAGTTTCAAATATACTTTCTCACCGTGACTCAATGCAAC  
GTGGATACATTCAACAGGAATACAAAATATGTATTCTGAGGAACTTTCACATCGTATATCGTCTGAACT  
CAGTGAAACCACAAGGTATGGAAAATTGTAGAAAAATCTTTATTGCATGATAAATCAAATATTGCAC  
AGCTATACTAGCTGAAGAGAAAGCACTGTGCTCTGGATTCTTGATCCTGCTGGACGTGATGCGACTG  
TTCTGAAAGAAGCTCTAAGTGCTGAAAGTCTTGATCTGAAAGCAGCTACTGATATAATTTGTTCCAGGA  
CACCATCACAGCTGCAAATAATGAAACAGACATATTATGCAAAGTTTGGTACTTATCTTGAGCATGACA  
TTAGTCAGCAAGCATCCGGCGATCATCAGAAGATCTTACTAGCCTATGTTGGCATTCCACGCTACGAAG  
GCCCGGAGGTTGATCCCACTATAGTGACACATGATGCGAAGGACCTCTACAAAGCTGGTGAGAAAAA  
GCTGGGCACAGATGAGAAAACCTTCATCCGCATCTTACTGAGCGCAGCTGGGCACACATGGCAGCT  
GTTGCTTCTGCTTACCGTCACATGTATGATCGGTGTTACAGAAGGTTGTGAAGAATGAAACATCTGGA  
AACTTTGAAGTTGCTCTGTAACTATCCTCAGATGTGCTGAGAATCCAGCGAAGTATTTGCTAAGGTG  
TTGAGGAAGTCCATGAAAGGTCTAGGTAAGTACTGATGACAAGACACTTGTAAGGGTTGTGGTAACAAGGA  
CTGAGATTGATATGCAGTATATCAAGGCAGAATATTACAAGAAATACAAAAAGCCGTTGGCTGATGCTA  
TCCATTCCGAAACATCAGGCGGTTATCGGACGTTCTCTCTTCTTGTGGTAGCCATTAG

>AeAnn10 AEGTA28110

ATGGCTGCCCCGTTCTCCTGCCGCCGAGGGTTCGAGAACGAGTGCAGAGAGATCCACGGAGCATGCG  
ACGAGCCGCGCCGCCTGAGCCGCCTCCTGGCTCACCCGAGCGCGTCGGAGAGGCAGCAGATCAAGG  
CGACGTACCGCGCAATGTTGCGGAGGACCTCGCCGGCAGGCTCCATAAAACCTCACGGCCAATCA  
GGACAACGAGTCTCAGCATGGCCTCCCTCTCCAGCTCTGCAACCTGCTCTACCTGTGGATGCTTGACC  
TGGCGGAGCGAGACGCGATCATGGCGAGGGACGCCATCGAGAGCGGCGCGGGCCGATTACCGCGC  
CCTTGTCGAGGTCTTACGCGGCGGAAGCAGGACCAGCTCTTCTTACCAAGCAGGCGTACCTGGCC  
AGGTTCAAGAAGAACCTGGAGCAGGACATGGTCACCGACCCCTCGCACCCCTTATCAGAGACTATTGGT  
AGCTCTGGCAACCTCCCACAAGTCGCACCACGATGAACCCAGCCGGCACATCGCGAAATGCGACGCC  
AGGCGATTGTACGACGCCAAGAACGGCGGCGGCACGGGATCGGTGACGAGGCCGCCATCCTCGAGA  
TGTTACAGCAAGAGGAGCATCCCACAGCTCAGGCTGGCGCTCTGCAGCTACAAGCACATATATGGGCAT  
GACTTACCAAAGCACTGAAGAAGAATTTGGCTGGCGATTTTGAAGAGTCTCTGAGAGTTGTTGTCA  
AGTGCATCTACACTCCTTCCAAGTATTACTGTAAGTTACTGCAGAGGAGTATGCAACGCCCAGAAGCT  
GATAAAAGGTTGGTTACGAGGGCTATCTTGGGCAGCGACGACGTCGGCATAAACGAGATCAAGTTGGC  
GTTCAAGAGTAACTTTGGAAAGAACCTCGCAGATTTTCATCCATGAAAGCTTACCACAGAGTGATTACA  
GAGAGTTTCTTTGGTTATGGCAAGGGGGCCAGTGCCTAGTAGCATCATAA

>AeAnn11 AEGTA31729

ATGGCGACGCTCTCCGTCCCCGCCGCGTCCCGGCCGTCGCCGAGGACTGCGAGCAGCTGCGCAAGG  
CGTTTCGGGGGTGGGGCACCAACGAGCGCCTCATCGTCTCCATCCTGGCGCACCGCGACGCCGCGCA  
GCGCCGCGCCATCCGCCGCGCTACGCCGAGGCCTACGGCGAGGAGCTGCTCCGCGCCATCGGCGAC  
GAGATCCACGGCAAGTTCGAGAGGGCGGTGACCCAGTGGACGCTGGACCCGGCGGAGCGGGACGCG  
GAGCTGGCCGGCGAGGAGGCCAAGAAGTGGCAGCCGGGGGGCCGCGCGCTCGTCGAGATCGCCTGC  
GCGCGCACCCCCGCGCAGCTCTTCGCCGCCAAGCAGGCCTACCACGACCGCTTCAAGCGCTCGCTCG  
AGGAGGACGTCGCCGCGCACGTCACCGGCGACTTCCGCAAGCTTCTGGTGCCTCTTGTAAGCGCATA  
CGCTACGATGGTCCGGAGGTGAACACATCGTTGGCACACTCTGAAGCCAAAATACTCAATGGAAAGAT  
CAACGAGAAGGCCTACAGTGATGATGAGATCGTCAGGATTCTACTACAAGGAGCAAGGCTCAGCTA  
CTTGCAACATTCAACAGCTACAATGATCAGTTCAGTCATCCATCACTAAGGACCTCAAGGAAGACCC  
AAAGAACGAGTTCCTCTCAACCCTGAGGGCGATCATAAGGTGTTTCACTTGCCCTGACAGATACTTTG  
AGAAGGTCGTCCGGTTGGCCCTTGGAGGGCTCGGCACAGACGAGAACCCTTACGAGGGTCATAAC  
CACTCGCGCCGAGGTGGACCTGAAGGTGATAAAGGAGGCGTACCAGAAGAGGAACAGCGTCCCGCT  
GGAGAAGGCTGTTTCCAAGGAAACAAGCAGAGACTATGAAGATATGATGCTCGCACTTCTGGGGGCA  
GAGTATTGA

>AeAnn12 AEGTA27331

ATGGCGACGCTCAAGGTCCCCTCCAACGACCCGGCCCTCGCCGACGACTGCGACAACCTCCGCAAGG  
CCTTCCAAGGGTGGGGCACGAACGAGGCGCTCATCATCTCCATCCTGGGCCACCGCGACGCCGCGCA  
GCGCCGCGCCATCCGCAAGCACTACGCCGACACCTACGGCGAGGAGCTGCTCCGGAGCATCACCGAC  
GAGATCTCCGGCGACTTCGAGAGGGCCGTGATCCTGTGGACGCTGGACCCGGCGGAGCGGGACGCGG  
TGCTCGCCAACGAGACCGCCAAGAAGTGGCACCCCGGGAACCCCGTGCTGGTTCGAGATCGCCTGCGC  
GCGCGGCTCCAAGCAGCTCTTCGCTGCCAGGCAGGCCTACCATGACCGCTTCAAGCGCTCGCTCGAG  
GAGGACGTCGCTGCACACGTCACCGGCGACTTCCGCAAGTATCTTATCCCTTTGGGCTACATTCAGATC  
AAATTCAGTTGCGATGGTGGCTTTTGTACCTTGTTCCTGGCCATTTTCTGATTTTGGAGCTGTTGGTGC  
CACTTGTAAGCTCACACCGCTATGAGGGACCAGAGGTCAACACAAGGTTGGCTCATTAGAGGCCAA  
ATTACTGCATGAGAAGATTGAGCATAAGGCTTATGGTATGATGAGGTCATCAGAATTCTACCACTAG  
GAGCAAAGCTCAGCTGCTTGCAACATTCAATAATTACAATGATACATTTGGTCACCCAATCACTAAGGA  
TCTGAAGGCTGACCCCAAGGATGAGTTCCTCAAGACCCTGCGGGCTGTTATCCGGTGTTCACCTGCC  
CTGATAGGTACTTTGAGAAGGTGGCCAGGCTGGCCATTGCAGGGAATGGAACAGATGAGAACTCCCT  
CACTAGGGTCATCACCAACCGTGCCGAGGTGGACCTGAAGCTGATCAAAGAGGCGTACCAGAAGAGG  
AACAGTGTTCCTTGGAAGGCCGTCGAGGCGACACTTCCGGCGACTATGAGAGCATGCTCCTTG  
CCCTCCTGGGGAAGGAGTAG
