# Supplementary material for: Comprehensive analyses of the annexin gene family in wheat
Source: PubMed Central journal article supplement (PMC4884362; doi:10.1186/s12864-016-2750-y), 2016-05-28
Supplement: 12864_2016_2750_MOESM14_ESM.pdf [file 12864_2016_2750_MOESM14_ESM.pdf]

**Additional file 14: Table S7.** Identifiers for annexin genes on Microarrays in Wheat.

| <b>Type</b>                               | <b>Gene</b>             | <b>Identifiers</b>             |
|-------------------------------------------|-------------------------|--------------------------------|
| Wheat 61K Affymetrix<br>microarray        | <i>TaAnn1-A</i>         | <i>Ta.9484.1.S1_at</i>         |
|                                           | <i>TaAnn1-B</i>         | <i>Ta.9484.1.S1_at</i>         |
|                                           | <i>TaAnn1-D</i>         | <i>Ta.9484.1.S1_at</i>         |
|                                           | <i>TaAnn2-A</i>         | <i>Ta.3378.2.A1_at</i>         |
|                                           | <i>TaAnn2-B</i>         | <i>TaAffx.123163.1.S1_at</i>   |
|                                           | <i>TaAnn2-D</i>         | <i>TaAffx.123163.1.S1_at</i>   |
|                                           | <i>TaAnn3-A</i>         | <i>Ta.25635.1.S1_at</i>        |
|                                           | <i>TaAnn3-B</i>         | <i>Ta.25635.1.S1_at</i>        |
|                                           | <i>TaAnn4-A</i>         | <i>Ta.1577.1.S1_at</i>         |
|                                           | <i>TaAnn4-B</i>         | <i>Ta.1577.1.S1_at</i>         |
|                                           | <i>TaAnn4-D</i>         | <i>Ta.1577.1.S1_at</i>         |
|                                           | <i>TaAnn5-B</i>         | <i>Ta.16714.1.S1_s_at</i>      |
|                                           | <i>TaAnn6-A</i>         | <i>Ta.9484.1.S1_at</i>         |
|                                           | <i>TaAnn6-B</i>         | <i>Ta.9484.1.S1_at</i>         |
|                                           | <i>TaAnn7-A</i>         | <i>Ta.4305.2.S1_at</i>         |
|                                           | <i>TaAnn7-B</i>         | <i>TaAffx.55362.1.S1_at</i>    |
|                                           | <i>TaAnn7-D</i>         | <i>Ta.4305.1.S1_at</i>         |
|                                           | <i>TaAnn8-A</i>         | <i>Ta.18318.1.S1_at</i>        |
|                                           | <i>TaAnn8-B</i>         | <i>Ta.18318.1.S1_at</i>        |
|                                           | <i>TaAnn8-D</i>         | <i>Ta.18318.1.S1_at</i>        |
|                                           | <i>TaAnn9-A</i>         | <i>Ta.13966.1.S1_at</i>        |
|                                           | <i>TaAnn9-B</i>         | <i>Ta.13966.1.S1_at</i>        |
|                                           | <i>TaAnn9-D</i>         | <i>Ta.13966.1.S1_at</i>        |
|                                           | <i>TaAnn11-A</i>        | <i>Ta.1577.1.S1_at</i>         |
| <i>TaAnn11-D</i>                          | <i>Ta.1577.1.S1_at</i>  |                                |
| <i>TaAnn12-A</i>                          | <i>Ta.14590.2.S1_at</i> |                                |
| <i>TaAnn12-D</i>                          | <i>Ta.14590.1.S1_at</i> |                                |
| NetAffx™ Analysis Center<br>wheat targets | <i>TaAnn10-A</i>        | <i>TaAffx.114559.1.S1_x_at</i> |
|                                           | <i>TaAnn10-B</i>        | <i>TaAffx.114559.1.S1_x_at</i> |
|                                           | <i>TaAnn10-D</i>        | <i>TaAffx.114559.1.S1_x_at</i> |
