# Supplementary material for: Comprehensive analyses of the annexin gene family in wheat
Source: PubMed Central journal article supplement (PMC4884362; doi:10.1186/s12864-016-2750-y), 2016-05-28
Supplement: 12864_2016_2750_MOESM15_ESM.pdf [file 12864_2016_2750_MOESM15_ESM.pdf]

**Additional file 15: Table S8.** Primer pairs used for the expression analysis of wheat annexin genes by quantitative RT-PCR.

| <b>Name</b>      | <b>Forward primer</b>          | <b>Reverse primer</b>          |
|------------------|--------------------------------|--------------------------------|
| <i>TaAnn1-D</i>  | 5' GTGCGAGGTTCCGGTTGCTAC 3'    | 5' GCCTTCGTTGCGTGGGAC 3'       |
| <i>TaAnn2-A</i>  | 5' TGCTTCAGTTCCGATGCTCTTC 3'   | 5' GTCACCGTCGTCTTGTACCTCA 3'   |
| <i>TaAnn3-B</i>  | 5' CTCATCGTCGGCAAGTAAACC 3'    | 5' TCAGCCGTACACGACCTCAG 3'     |
| <i>TaAnn4-A</i>  | 5' CCAACGCCGCCACGAAG 3'        | 5' AGGCCTGCTTCACTTCCAGG 3'     |
| <i>TaAnn6-B</i>  | 5' GCGGAAACATCACGCGATAA 3'     | 5' CGCAAGGAAGAGCCTGGAC 3'      |
| <i>TaAnn7-B</i>  | 5' ATGAACCGAGGCAACAGTCTATG 3'  | 5' CGTAATCTTACCTTCGCACTCTTG 3' |
| <i>TaAnn8-B</i>  | 5' GCATCCATAACATCCCTCCCC 3'    | 5' TCCTTCTTCTCCCTCGCTTCC 3'    |
| <i>TaAnn9-B</i>  | 5' GCTCTGTGCGATTACTTTACCCTA 3' | 5' GCAGAAATAGTTGTCAGCGAAGC 3'  |
| <i>TaAnn10-B</i> | 5' ACGCCAGAAAGCCGATAAA 3'      | 5' CCCTTGCCATAACCAAAGAAAC 3'   |
| <i>TaAnn12-A</i> | 5' TCCTGTGGACGCTGGACCC 3'      | 5' CCTGCCTGACGGCGAAGAG 3'      |
| <i>Actin</i>     | 5' TACTCCCTCACAAACAACCG 3'     | 5' AGAACCTCCACTGAGAACAA 3'     |
